# Supplementary material for: Ultra-processed foods and excessive free sugar intake in the UK: a nationally representative cross-sectional study
Source: PubMed Central journal article supplement — BMJ Open. 2019 Oct 28;9(10):e027546. doi: 10.1136/bmjopen-2018-027546 (PMC6830631; doi:10.1136/bmjopen-2018-027546), 2019-10-28
Supplement: bmjopen-2018-027546.draft_revisions.pdf [file bmjopen-2018-027546.draft_revisions.pdf]

# BMJ Open

BMJ Open is committed to open peer review. As part of this commitment we make the peer review history of every article we publish publicly available.

When an article is published we post the peer reviewers' comments and the authors' responses online. We also post the versions of the paper that were used during peer review. These are the versions that the peer review comments apply to.

The versions of the paper that follow are the versions that were submitted during the peer review process. They are not the versions of record or the final published versions. They should not be cited or distributed as the published version of this manuscript.

BMJ Open is an open access journal and the full, final, typeset and author-corrected version of record of the manuscript is available on our site with no access controls, subscription charges or pay-per-view fees (<http://bmjopen.bmj.com>).

If you have any questions on BMJ Open's open peer review process please email [info.bmjopen@bmj.com](mailto:info.bmjopen@bmj.com)

# BMJ Open

## Ultra-processed foods and excessive free sugar intake in the United Kingdom: a nationally representative cross-sectional study

|                               |                                                                                                                                                                                                                                                                                                                                                                                                                                                                                                                                                                                                                                                                                                                                                                                                                                                                                                                                                                                                                                                                                                                                                                                                                                                               |
|-------------------------------|---------------------------------------------------------------------------------------------------------------------------------------------------------------------------------------------------------------------------------------------------------------------------------------------------------------------------------------------------------------------------------------------------------------------------------------------------------------------------------------------------------------------------------------------------------------------------------------------------------------------------------------------------------------------------------------------------------------------------------------------------------------------------------------------------------------------------------------------------------------------------------------------------------------------------------------------------------------------------------------------------------------------------------------------------------------------------------------------------------------------------------------------------------------------------------------------------------------------------------------------------------------|
| Journal:                      | <i>BMJ Open</i>                                                                                                                                                                                                                                                                                                                                                                                                                                                                                                                                                                                                                                                                                                                                                                                                                                                                                                                                                                                                                                                                                                                                                                                                                                               |
| Manuscript ID                 | bmjopen-2018-027546                                                                                                                                                                                                                                                                                                                                                                                                                                                                                                                                                                                                                                                                                                                                                                                                                                                                                                                                                                                                                                                                                                                                                                                                                                           |
| Article Type:                 | Research                                                                                                                                                                                                                                                                                                                                                                                                                                                                                                                                                                                                                                                                                                                                                                                                                                                                                                                                                                                                                                                                                                                                                                                                                                                      |
| Date Submitted by the Author: | 27-Oct-2018                                                                                                                                                                                                                                                                                                                                                                                                                                                                                                                                                                                                                                                                                                                                                                                                                                                                                                                                                                                                                                                                                                                                                                                                                                                   |
| Complete List of Authors:     | <p>Rauber, Fernanda; Universidade de Sao Paulo, Departamento de Nutrição; Universidade de Sao Paulo, Núcleo de Pesquisas Epidemiológicas em Nutrição e Saúde</p> <p>Louzada, Maria Laura; Universidade Federal de Sao Paulo, Departamento de Políticas Públicas e Saúde Coletiva; Universidade de Sao Paulo, Núcleo de Pesquisas Epidemiológicas em Nutrição e Saúde</p> <p>Martinez Steele, Euridice; Universidade de Sao Paulo, Departamento de Nutrição; Universidade de Sao Paulo, Núcleo de Pesquisas Epidemiológicas em Nutrição e Saúde</p> <p>Rezende, Leandro; Faculdade de Medicina, Universidade de São Paulo, Medicina Preventiva; Universidade de Sao Paulo, Núcleo de Pesquisas Epidemiológicas em Nutrição e Saúde</p> <p>Millett, Christopher; Imperial College, Public Health Policy Evaluation Unit; Universidade de Sao Paulo, Núcleo de Pesquisas Epidemiológicas em Nutrição e Saúde</p> <p>Monteiro, Carlos; Universidade de Sao Paulo, Departamento de Nutrição; Universidade de Sao Paulo, Núcleo de Pesquisas Epidemiológicas em Nutrição e Saúde</p> <p>Levy, Renata; Faculdade de Medicina, Universidade de São Paulo, Medicina Preventiva; Universidade de Sao Paulo, Núcleo de Pesquisas Epidemiológicas em Nutrição e Saúde</p> |
| Keywords:                     | Food processing, Ultra-processed, Free sugar, United Kingdom                                                                                                                                                                                                                                                                                                                                                                                                                                                                                                                                                                                                                                                                                                                                                                                                                                                                                                                                                                                                                                                                                                                                                                                                  |
|                               |                                                                                                                                                                                                                                                                                                                                                                                                                                                                                                                                                                                                                                                                                                                                                                                                                                                                                                                                                                                                                                                                                                                                                                                                                                                               |

SCHOLARONE™  
Manuscripts

1  
2  
3 **Ultra-processed foods and excessive free sugar intake in the United Kingdom: a**  
4 **nationally representative cross-sectional study**  
5  
6

7 Fernanda Rauber <sup>1,2</sup>, Maria Laura da Costa Louzada <sup>1,3</sup>, Eurídice Martínez Steele <sup>1,2</sup>,  
8 Leandro Fórniás Machado de Rezende <sup>1,4</sup>, Christopher Millett <sup>1,5</sup>, Carlos Augusto Monteiro  
9 <sup>1,2</sup>, Renata Bertazzi Levy <sup>1,4</sup>  
10  
11  
12  
13

14  
15 <sup>1</sup> Núcleo de Pesquisas Epidemiológicas em Nutrição e Saúde, Universidade de São Paulo,  
16 São Paulo, Brasil.

17  
18 <sup>2</sup> Departamento de Nutrição, Faculdade de Saúde Pública, Universidade de São Paulo, São  
19 Paulo, Brasil.

20  
21  
22 <sup>3</sup> Departamento de Políticas Públicas e Saúde Coletiva, Universidade Federal de São Paulo,  
23 São Paulo, Brasil.

24  
25  
26 <sup>4</sup> Departamento de Medicina Preventiva, Faculdade de Medicina FMUSP, Universidade de  
27 São Paulo, São Paulo, Brasil.

28  
29 <sup>5</sup> Public Health Policy Evaluation Unit, School of Public Health, Imperial College London,  
30 London, United Kingdom.  
31  
32  
33  
34  
35  
36

37 **Corresponding author:** Fernanda Rauber, [rauber.fernanda@gmail.com](mailto:rauber.fernanda@gmail.com), Departamento de  
38 Nutrição, Faculdade de Saúde Pública, Universidade de São Paulo, Av. Dr. Arnaldo, 715, São  
39 Paulo 01246-907, Brasil.  
40  
41  
42  
43

44 **Word count:** 3,157  
45  
46  
47  
48  
49  
50  
51  
52  
53  
54  
55  
56  
57  
58  
59  
60

## ABSTRACT

**Objectives:** to describe dietary sources of free sugars in different age groups of the UK population and to estimate the proportion of excessive free sugars that could potentially be avoided by reducing consumption of their main sources.

**Design and setting:** Cross-sectional data from the UK National Diet and Nutrition Survey (2008–14) were analysed. Food items collected using a four-day food diary were classified according to the NOVA system.

**Participants:** 9,364 individuals aged 1.5 years and above.

**Main outcome measures:** Average dietary content of free sugars and proportion of individuals consuming more than 10% of total energy from free sugars.

**Data analysis:** Poisson regression was used to estimate the associations between each of the NOVA food group and intake of free sugars. We also estimated population attributable fraction for excessive free sugar intake associated with consumption of ultra-processed foods and table sugar. Analyses were stratified by age group and adjusted for age, sex, ethnicity, region, and equivalised household income (sterling pounds).

**Results:** Ultra-processed foods account for 56.8% of total energy intake and 64.7% of total free sugars in the UK diet. Free sugars represent 12.4% of total energy intake and 61.3% of the sample exceeded the recommended limit of 10% energy from free sugars. This percentage was higher among children (74.9%) and adolescents (82.9%). Excessive free sugar intake increased linearly across quintiles of ultra-processed food consumption for all age groups, except among the elderly. We estimated that 47% of excessive free sugars intake in the UK population could be avoided if the consumption of ultra-processed foods was eliminated.

**Conclusion:** Our findings suggest that actions to reduce the ultra-processed food consumption generally rich in free sugars could lead to substantial public health benefits.

**Keywords:** Food processing; Ultra-processed; Free sugar; United Kingdom.

## ARTICLE SUMMARY

### Strengths and limitations of this study

- Use of a large and nationally representative sample of the UK population, increasing generalisability.
- Use of data on free sugars rather than total sugars or sugar-sweetened beverages, which correspond to the guidelines relevant area of prioritisation.
- Use of NOVA system, which has been recognised as a valid tool for public health and nutrition research and policy by international organizations.
- Dietary data obtained by food diaries are subject to potential error and bias.
- NDNS collects limited information indicative of food processing (for example, place of meals and product brands), which may lead to misclassification of food items.

## INTRODUCTION

Excessive consumption of free sugar is associated with obesity, type 2 diabetes, dental caries, and several other health outcomes [1-4]. To address this associated health burden, the World Health Organization (WHO) [5] recommends that free sugars should be reduced to less than 10% of total energy intake and also suggests a level below 5% to obtain additional health benefits. Achievement of this ambitious target will require bold and systematic efforts to reduce sugar across a variety of food products in most settings.

As defined by the NOVA food classification system, ultra-processed foods are industrial formulations of many ingredients, mostly of exclusive industrial use, that result from a sequence of industrial processes (hence ultra-processed) [6]. In some high-income countries, including the UK, ultra-processed foods account for more than half of total dietary energy intake [7-9]. Importantly, national dietary surveys conducted in high- and middle-income countries [8-12] have shown a strong and positive association between consumption of ultra-processed foods and excessive dietary added (or free) sugar intake.

Free sugar intake in the UK is high, ranging from 11 to 15% of total energy intake [13]. To address this, the UK has implemented a number of measures including a sugar-sweetened beverage levy in 2018. However, action on sugar sweetened beverages alone is unlikely to reduce population level sugar intake to WHO recommended levels. In a more recent publication, the voluntary sugar reduction programme continues being endorsed by the government, but other measures such as restriction of advertising and in-store promotions of some sugary foods are also being considered as strategies to reduce childhood obesity [14]. A better understanding of the key sources of sugar intake in the UK diet is required to inform policy development. In this study, we describe the dietary sources of free sugars in different age groups of the UK population taking into account food groups classified according to the NOVA classification system and estimated the proportion of excessive free sugars that could be potentially avoided by reducing the consumption of their main dietary sources.

## METHODS

### Data source and collection

We used data from the National Diet and Nutrition Survey Rolling Programme (NDNS) years 1-6 (2008/09-2009/10, 2010/11-2011/12, 2012/13-2013/14) combined, which is a cross-sectional survey of people aged 1.5 years or older. The survey was designed to be representative of the UK population and provides comprehensive information on food intake. Details of the rationale, design, and methods of the survey have been described in detail elsewhere [15]. Briefly, the sample was drawn from households randomly selected from the UK Postcode Address File, a list of all UK addresses. One adult (aged 19 years and older) and one child (aged 1.5–18 years), if available, were randomly selected from each household. Only a child was selected from some households to be part of a 'child boost' to ensure approximately equal numbers of children and adults. Participants (or in the case of children  $\leq 11$  years, their parent/carer) completed a four-day food diary and participated in an interview that included data on socio-demographic status.

Participants were asked to report all foods and drinks consumed both within and outside the home. Portion sizes were estimated using household measures or weights from packaging. Once completed, diaries were checked by interviewers with respondents and missing details added to improve completeness. Diary days were randomly selected to ensure balanced representation of all days of the week. All individuals who completed three or four days of dietary recording were eligible for inclusion in the study, giving a sample size of 9,374 (4,738 adults and 4,636 children) participants for years 1 to 6 (2008/09 to 2013/14) combined.

The food intake data from completed records were coded and edited using the software DINO (Diet In, Nutrients Out) and food and nutrient intakes estimated using nutrient composition data from the Department of Health's Nutrient Databank, updated for

1  
2  
3 each survey year [16, 17]. Free sugars are defined as sugars added to foods by the  
4 manufacturer, cook or consumer, plus sugars naturally present in honey, syrups, fruit juices  
5 and fruit concentrates [5]. Intakes in the UK NDNS are currently expressed as non-milk  
6 extrinsic sugars (NMES). The term NMES captures all the sugars defined by the term free  
7 sugars while also including half of the sugars present in dried, stewed or canned fruit. Based  
8 on the assumption that those definitions are sufficiently similar for assessment and  
9 monitoring purposes [1,3], this study used the term free sugars.  
10  
11  
12  
13  
14  
15

16 Computerized raw data files and documentation from this survey were obtained under  
17 license from the UK Data Archive (<http://www.esds.ac.uk>). All relevant research ethics and  
18 governance committees approved the survey.  
19  
20  
21  
22  
23

### 24 **Food classification according to processing**

25  
26  
27  
28  
29 We classified all recorded food items according to NOVA, a food classification system  
30 based on the nature, extent, and purpose of the industrial food processing [6]. This  
31 classification includes four groups: 1) unprocessed or minimally processed foods (e.g. fresh,  
32 dry or frozen fruits or vegetables; grains, flours and pasta; pasteurized or power plain milk,  
33 plain yogurt, fresh or frozen meat); 2) processed culinary ingredients (e.g. table sugar, oils,  
34 butter, and salt); 3) processed foods (e.g. vegetables in brine, cheese, simple breads, fruits  
35 in syrup, canned fish); and 4) ultra-processed foods (e.g. soft drinks, sweet or savoury  
36 packaged snacks, confectionery; packaged breads and buns; reconstituted meat products  
37 and pre-prepared frozen or shelf-stable dishes) (**see Suppl. Table S1**). The detailed  
38 description of NOVA classification can be found elsewhere [6, 18].  
39  
40  
41  
42  
43  
44  
45  
46  
47

48 All foods in NDNS are coded as food number and grouped into subsidiary food groups  
49 (n = 155). When possible, subsidiary food groups were directly classified according to NOVA  
50 (**see Suppl. Table S2**). When foods within a subsidiary food group pertained to different  
51 NOVA groups (n = 52), it was the food codes instead of the group, which were individually  
52  
53  
54  
55  
56  
57  
58  
59  
60



1  
2  
3 classified. By doing so, we were able to classify each underlying ingredient of homemade  
4 dishes in its corresponding NOVA group.  
5

6  
7 Although most food items in NDNS were systematically disaggregated into their  
8 individual components, about 4% of composite food codes were still mixed dishes compiled  
9 from two or more single-ingredient food codes [19]. Using the core sample of years 1 to 4  
10 (2008/09 to 2011/12) (n = 4,125), we estimated that these represented only 3% of total  
11 calories. In this case, dishes were categorised according to the main constituent ingredient.  
12 Dishes in which a main constituent ingredient was not clearly identified (e.g. chicken and  
13 vegetable soup) were classified as a specific subgroup of freshly prepared dishes based on  
14 one or more unprocessed or minimally processed food (group 1). Non-caloric supplements  
15 were not included in the analyses.  
16  
17  
18  
19  
20  
21  
22  
23  
24  
25

## 26 **Covariates**

27  
28  
29  
30  
31 Covariates included were age (years), sex, ethnicity (White, Mixed ethnic group, Black  
32 or Black British, Asian or Asian British and Other race), region (England North, England  
33 Central/Midlands, England South (including London), Scotland, Wales, and Northern  
34 Ireland), and equivalised household income (equivalised for different household sizes and  
35 composition using the McClements equivalence scale [15]). Due to the significant  
36 proportion of missing values for the equivalised household income (12.8%), we applied  
37 multiple imputation by chained equation method based on age, sex, ethnicity, excessive  
38 free sugars intake and ultra-processed food consumption. Multiple imputation was  
39 performed 20 times, and the Monte Carlo error analysis showed good statistical  
40 reproducibility of the results [20].  
41  
42  
43  
44  
45  
46  
47  
48  
49  
50  
51

## 52 **Data analysis**

1  
2  
3 For each survey day and age group (1.5 – 10 years, 11 – 18 years, 19 – 64 years, and  
4 ≥64 years), we defined extreme total energy intake outliers as values below the 1<sup>st</sup> and  
5 above the 99th percentiles [21]. Based on these criteria, we excluded ten individuals who  
6 had all days of food diary classified as outliers. In total, 9,364 (4,729 adults and 4,635  
7 children) participants were eligible for inclusion in the analyses and more than 91%  
8 completed the four food diary days. We used the mean of all available days of food diary  
9 for each individual.  
10  
11  
12  
13  
14  
15

16 Food items were sorted into mutually exclusive food groups according to NOVA  
17 classification. We combined the group of unprocessed or minimally processed foods with  
18 the group of processed culinary ingredients, as foods belonging to these two groups are  
19 usually combined together in culinary preparations and, therefore, consumed together.  
20 Thus, we performed the analyses considering three groups of foods: unprocessed or  
21 minimally processed foods and processed culinary ingredients, processed foods, and ultra-  
22 processed foods.  
23  
24  
25  
26  
27  
28  
29

30 First, we estimated the distribution of total energy and free sugars intake according to  
31 the food groups. Then, we calculated the mean free sugars intake of the overall diet and  
32 the prevalence of excessive intake of free sugars. We used the WHO recommendations [5]  
33 to assess the excessive intake of free sugars (≥10% of total energy). Analyses using the UK  
34 recommendations to further limit free sugars intake to less than 5% of total energy intake  
35 are presented in a supplementary table (**Suppl. Table S3**). Analyses were carried out for the  
36 entire population and also stratified by age group.  
37  
38  
39  
40  
41  
42

43 Next, the prevalence of excessive intake of free sugars (≥10% of total energy) was  
44 compared across quintiles of the energy share provided by each of the three food groups.  
45 Poisson regression was used to estimate prevalence ratios (PR) and 95% confidence  
46 intervals for the associations between each of the three food group quintiles and  
47 prevalence of individuals consuming more than 10% of total energy from free sugars. Tests  
48 of linear trend were performed to evaluate the quintiles as a single continuous variable. All  
49 analyses were stratified by age group. Multiple regression models were also performed to  
50 adjust for age, sex, ethnicity, region, and equivalised household income (sterling pounds).  
51  
52  
53  
54  
55  
56  
57  
58  
59  
60

Analyses using the entire population are presented in a supplementary table (**Suppl. Table S4**).

Finally, we estimated the proportion of excessive free sugar intake that could be potentially avoided under two counterfactual scenarios regarding the consumption of the main dietary sources of free sugar. The first counterfactual scenario assumed no consumption of ultra-processed food, while in the second scenario the table sugar consumption was set to zero. Table sugar included honey, molasses, maple syrup (100%), and also both sugar added to coffee/juice and sugar from homemade dishes. We calculated population attributable fraction (PAF) through the following equation:

$$PAF = \frac{P_{population} - P_{nonexposed}}{P_{population}}$$

Where  $P_{population}$  is the prevalence of excessive free sugar intake in the UK population and  $P_{nonexposed}$  is the prevalence of excessive free sugar intake in the counterfactual scenarios. Prevalences were adjusted for sex, age, ethnicity, region, and household income.

NDNS study weights were used in all analyses to account for sampling and non-response error. All statistical analyses were carried out using Stata Statistical Software version 14. The  $p$  values reported were two-tailed, and a threshold of <0.01 was considered for statistically significant associations.

## RESULTS

Ultra-processed foods account for 56.8% of total energy intake and 64.7% of total free sugars in the UK diet. Unprocessed or minimally processed foods and processed culinary ingredients represented an additional 34.3% of total energy intake and 23.8% of free sugars, and processed foods the remaining 8.8% of total energy intake and 11.5% of free sugars. Ultra-processed foods accounted for a higher percentage of total energy intake among children (63.5%) and adolescents (68%). The average UK daily intake of free sugars was 12.4% (SE 0.1) of total energy intake and 61.3% of British exceeded the recommended limit

1  
2  
3 of 10% energy from free sugars. This proportion was even higher among children (74.9%)  
4 and adolescents (82.9%) (**Table 1**).  
5  
6  
7  
8  
9  
10  
11  
12  
13  
14  
15  
16  
17  
18  
19  
20  
21  
22  
23  
24  
25  
26  
27  
28  
29  
30  
31  
32  
33  
34  
35  
36  
37  
38  
39  
40  
41  
42  
43  
44  
45  
46  
47  
48  
49  
50  
51  
52  
53  
54  
55  
56  
57  
58  
59  
60

For peer review only

**Table 1. Dietary contribution of NOVA food groups and indicators of the dietary content in free sugars according to age groups. UK population aged 1.5 years or over (2008–14).**

| Age groups     | Dietary contribution (% of total energy intake)                           |             |             |                 |              |             | % of total energy intake from free sugars                                 |             |              |                 |              |             | Individuals with ≥10% of total energy intake from free sugars |             |              |              |              |  |              |  |  |
|----------------|---------------------------------------------------------------------------|-------------|-------------|-----------------|--------------|-------------|---------------------------------------------------------------------------|-------------|--------------|-----------------|--------------|-------------|---------------------------------------------------------------|-------------|--------------|--------------|--------------|--|--------------|--|--|
|                | Unprocessed or minimally processed foods + Processed culinary ingredients |             |             | Processed foods |              |             | Unprocessed or minimally processed foods + Processed culinary ingredients |             |              | Processed foods |              |             | Ultra-processed foods                                         |             |              | Total        |              |  | Overall diet |  |  |
|                | Mean                                                                      | SE          |             | Mean            | SE           |             | Mean                                                                      | SE          |              | Mean            | SE           |             | Mean                                                          | SE          |              | %            | 95%CI        |  |              |  |  |
| 1.5 - 10 years | 31.96                                                                     | 0.33        | 4.51        | 0.10            | 63.53        | 0.34        | 18.82                                                                     | 0.45        | 5.15         | 0.22            | 76.03        | 0.49        | 14.00                                                         | 0.14        | 74.94        | 72.78        | 76.99        |  |              |  |  |
| 11 - 18 years  | 27.25                                                                     | 0.37        | 4.75        | 0.16            | 68.00        | 0.40        | 18.63                                                                     | 0.55        | 2.48         | 0.19            | 78.89        | 0.57        | 15.78                                                         | 0.19        | 82.91        | 80.72        | 84.90        |  |              |  |  |
| 19 - 64 years  | 34.75                                                                     | 0.32        | 10.37       | 0.19            | 54.89        | 0.35        | 24.68                                                                     | 0.50        | 12.96        | 0.38            | 62.36        | 0.56        | 11.93                                                         | 0.14        | 56.59        | 54.47        | 58.68        |  |              |  |  |
| ≥65 years      | 38.57                                                                     | 0.49        | 8.45        | 0.29            | 52.98        | 0.52        | 26.77                                                                     | 0.96        | 15.38        | 0.69            | 57.86        | 1.01        | 11.36                                                         | 0.23        | 56.83        | 52.98        | 60.59        |  |              |  |  |
| <b>Total</b>   | <b>34.35</b>                                                              | <b>0.22</b> | <b>8.83</b> | <b>0.13</b>     | <b>56.82</b> | <b>0.24</b> | <b>23.78</b>                                                              | <b>0.36</b> | <b>11.46</b> | <b>0.27</b>     | <b>64.75</b> | <b>0.40</b> | <b>12.44</b>                                                  | <b>0.10</b> | <b>61.27</b> | <b>59.76</b> | <b>62.76</b> |  |              |  |  |

For peer review only

1  
2  
3 Indicators of the dietary content in free sugars according to quintiles of the dietary  
4 contribution of NOVA food groups stratified by age groups are shown in **Tables 2 to 5** (1.5  
5 – 10 years, 11 – 18 years, 19 – 64 years, and  $\geq 64$  years, respectively). The dietary contents  
6 of free sugars increased linearly across quintiles of ultra-processed food consumption for  
7 children (from 10.4% in the lowest quintile to 15.3% in the highest quintile), adolescents  
8 (from 12.7% to 17.4%, respectively) and adults (from 9.6% to 15.2%, respectively), whereas  
9 the increase for elderly was not significant (from 10.6% to 11.7%, respectively). The  
10 prevalence of excessive free sugar intake also increased linearly across quintiles of ultra-  
11 processed food consumption for all age groups, except among the elderly group. Children  
12 in the highest quintiles of ultra-processed food consumption had a prevalence of excessive  
13 free sugar intake 60% higher (PRadj 1.6; 95% CI 1.3 to 1.9) than those in the lowest quintile  
14 group. The same trend was observed for adolescents (PRadj 1.6 95% IC 1.2 – 1.9) and adults  
15 (PRadj 1.7 95% IC 1.5 – 1.9), while no difference in prevalence was observed for elderly  
16 (PRadj 1.1 95% IC 0.8 – 1.4).  
17  
18  
19  
20  
21  
22  
23  
24  
25  
26  
27  
28

29 Opposite trends were observed for the group of unprocessed or minimally processed  
30 foods and processed culinary ingredients, where the prevalence of excessive free sugars  
31 intake decreased from the first to the last quintile of these food groups in all age groups.  
32 The prevalence of excessive free sugars intake also decreased from the first to the last  
33 quintile of processed foods, but only in adolescents and adults.  
34  
35  
36  
37  
38  
39  
40  
41  
42  
43  
44  
45  
46  
47  
48  
49  
50  
51  
52  
53  
54  
55  
56  
57  
58  
59  
60

**Table 2. Indicators of the dietary content in free sugars according to quintiles of the dietary contribution of NOVA food groups in the UK population aged 1.5 - 10 years (2008-14).**

| Dietary contribution (% of total energy intake)                                  |       |       |       | % of total energy intake from free sugars |      | Individuals with $\geq 10\%$ of total energy intake from free sugars |                   |                    |       |      |  |
|----------------------------------------------------------------------------------|-------|-------|-------|-------------------------------------------|------|----------------------------------------------------------------------|-------------------|--------------------|-------|------|--|
| Quintile                                                                         | mean  | min   | max   | mean                                      | SE   | %                                                                    | PR*               | PRadj <sup>i</sup> | 95%CI |      |  |
| <b>Unprocessed or minimally processed foods + Processed culinary ingredients</b> |       |       |       |                                           |      |                                                                      |                   |                    |       |      |  |
| 1st                                                                              | 15.36 | 0.00  | 20.92 | 15.80                                     | 0.33 | 82.99                                                                | 1.00              | 1.00               | –     | –    |  |
| 2nd                                                                              | 24.86 | 20.93 | 28.41 | 14.60                                     | 0.30 | 79.62                                                                | 0.96              | 0.95               | 0.89  | 1.02 |  |
| 3rd                                                                              | 31.57 | 28.46 | 34.96 | 14.37                                     | 0.28 | 81.68                                                                | 0.98              | 0.99               | 0.93  | 1.06 |  |
| 4th                                                                              | 39.30 | 34.98 | 43.86 | 13.66                                     | 0.36 | 73.40                                                                | 0.88              | 0.91               | 0.84  | 0.99 |  |
| 5th                                                                              | 52.46 | 43.97 | 79.93 | 11.13 <sup>‡</sup>                        | 0.26 | 53.87                                                                | 0.65 <sup>‡</sup> | 0.69 <sup>‡</sup>  | 0.61  | 0.78 |  |
| <b>Processed foods</b>                                                           |       |       |       |                                           |      |                                                                      |                   |                    |       |      |  |
| 1st                                                                              | 0.41  | 0.00  | 1.33  | 13.93                                     | 0.29 | 72.58                                                                | 1.00              | 1.00               | –     | –    |  |
| 2nd                                                                              | 2.56  | 1.34  | 3.79  | 14.82                                     | 0.30 | 80.23                                                                | 1.11              | 1.11               | 1.03  | 1.19 |  |
| 3rd                                                                              | 5.18  | 3.79  | 6.82  | 13.77                                     | 0.25 | 73.85                                                                | 1.02              | 1.04               | 0.95  | 1.13 |  |
| 4th                                                                              | 8.96  | 6.83  | 11.95 | 13.37                                     | 0.31 | 73.23                                                                | 1.01              | 1.02               | 0.93  | 1.12 |  |
| 5th                                                                              | 16.05 | 12.04 | 41.71 | 13.16                                     | 0.52 | 69.20                                                                | 0.95              | 0.99               | 0.86  | 1.14 |  |
| <b>Ultra-processed foods</b>                                                     |       |       |       |                                           |      |                                                                      |                   |                    |       |      |  |
| 1st                                                                              | 36.38 | 15.11 | 43.67 | 10.35                                     | 0.38 | 46.41                                                                | 1.00              | 1.00               | –     | –    |  |
| 2nd                                                                              | 49.00 | 43.72 | 53.03 | 12.37                                     | 0.30 | 66.78                                                                | 1.44              | 1.40               | 1.15  | 1.70 |  |
| 3rd                                                                              | 57.17 | 53.06 | 60.95 | 13.84                                     | 0.37 | 74.22                                                                | 1.60              | 1.50               | 1.24  | 1.81 |  |
| 4th                                                                              | 65.58 | 60.96 | 70.14 | 14.48                                     | 0.26 | 80.95                                                                | 1.74              | 1.62               | 1.35  | 1.95 |  |
| 5th                                                                              | 78.05 | 70.15 | 100   | 15.32 <sup>‡</sup>                        | 0.25 | 81.41                                                                | 1.75 <sup>‡</sup> | 1.62 <sup>‡</sup>  | 1.35  | 1.95 |  |

\*PR=Prevalence ratios estimated using Poisson regression.

<sup>i</sup>PRadj=Prevalence ratios adjusted for sex, age, race/ethnicity (White, Mixed ethnic group, Black or Black British, Asian or Asian British and Other race), region, and household income.

<sup>‡</sup>Significant linear trend across all quintiles ( $p \leq 0.001$ ).

**Table 3. Indicators of the dietary content in free sugars according to quintiles of the dietary contribution of NOVA food groups in the UK population aged 11 - 18 years (2008-14).**

| Dietary contribution (% of total energy intake)                                  |       |       |       | % of total energy intake from free sugars |      | Individuals with ≥10% of total energy intake from free sugars |                   |                    |       |      |
|----------------------------------------------------------------------------------|-------|-------|-------|-------------------------------------------|------|---------------------------------------------------------------|-------------------|--------------------|-------|------|
| Quintile                                                                         | mean  | min   | max   | mean                                      | SE   | %                                                             | PR*               | PRadj <sup>i</sup> | 95%CI |      |
| <b>Unprocessed or minimally processed foods + Processed culinary ingredients</b> |       |       |       |                                           |      |                                                               |                   |                    |       |      |
| 1st                                                                              | 14.43 | 0.00  | 20.89 | 17.28                                     | 0.36 | 88.89                                                         | 1.00              | 1.00               | –     | –    |
| 2nd                                                                              | 24.61 | 20.92 | 28.43 | 15.87                                     | 0.35 | 84.30                                                         | 0.95              | 0.95               | 0.89  | 1.01 |
| 3rd                                                                              | 31.46 | 28.44 | 34.93 | 15.50                                     | 0.37 | 81.82                                                         | 0.92              | 0.92               | 0.86  | 0.99 |
| 4th                                                                              | 39.24 | 34.98 | 43.84 | 13.96                                     | 0.43 | 78.15                                                         | 0.88              | 0.89               | 0.82  | 0.96 |
| 5th                                                                              | 52.96 | 43.88 | 79.86 | 13.60 <sup>‡</sup>                        | 0.80 | 66.92                                                         | 0.75 <sup>‡</sup> | 0.77 <sup>‡</sup>  | 0.66  | 0.88 |
| <b>Processed foods</b>                                                           |       |       |       |                                           |      |                                                               |                   |                    |       |      |
| 1st                                                                              | 0.29  | 0.00  | 1.33  | 17.18                                     | 0.41 | 85.11                                                         | 1.00              | 1.00               | –     | –    |
| 2nd                                                                              | 2.56  | 1.34  | 3.79  | 15.81                                     | 0.35 | 81.74                                                         | 0.96              | 0.96               | 0.90  | 1.03 |
| 3rd                                                                              | 5.16  | 3.80  | 6.81  | 15.62                                     | 0.35 | 86.87                                                         | 1.02              | 1.02               | 0.96  | 1.09 |
| 4th                                                                              | 8.94  | 6.82  | 11.95 | 14.52                                     | 0.43 | 79.40                                                         | 0.93              | 0.93               | 0.86  | 1.01 |
| 5th                                                                              | 17.53 | 12.05 | 41.62 | 13.68 <sup>‡</sup>                        | 0.57 | 74.89                                                         | 0.88 <sup>‡</sup> | 0.88 <sup>‡</sup>  | 0.78  | 0.99 |
| <b>Ultra-processed foods</b>                                                     |       |       |       |                                           |      |                                                               |                   |                    |       |      |
| 1st                                                                              | 35.29 | 18.40 | 42.94 | 12.72                                     | 1.39 | 56.18                                                         | 1.00              | 1.00               | –     | –    |
| 2nd                                                                              | 49.35 | 43.70 | 53.03 | 13.65                                     | 0.56 | 75.73                                                         | 1.35              | 1.34               | 1.03  | 1.74 |
| 3rd                                                                              | 56.91 | 53.08 | 60.96 | 14.19                                     | 0.40 | 79.24                                                         | 1.41              | 1.40               | 1.09  | 1.80 |
| 4th                                                                              | 65.63 | 60.96 | 70.13 | 14.99                                     | 0.32 | 80.76                                                         | 1.44              | 1.42               | 1.11  | 1.82 |
| 5th                                                                              | 79.05 | 70.14 | 100   | 17.37 <sup>‡</sup>                        | 0.29 | 89.04                                                         | 1.58 <sup>‡</sup> | 1.56 <sup>‡</sup>  | 1.23  | 1.99 |

\*PR=Prevalence ratios estimated using Poisson regression.

<sup>i</sup>PRadj=Prevalence ratios adjusted for sex, age, race/ethnicity (White, Mixed ethnic group, Black or Black British, Asian or Asian British and Other race), region, and household income.

<sup>‡</sup>Significant linear trend across all quintiles ( $p \leq 0.001$ ).



**Table 4. Indicators of the dietary content in free sugars according to quintiles of the dietary contribution of NOVA food groups in the UK population aged 19 - 64 years (2008-14).**

| Dietary contribution (% of total energy intake)                                  |       |       |       | % of total energy intake from free sugars |      | Individuals with ≥10% of total energy intake from free sugars |                   |                    |       |      |
|----------------------------------------------------------------------------------|-------|-------|-------|-------------------------------------------|------|---------------------------------------------------------------|-------------------|--------------------|-------|------|
| Quintile                                                                         | mean  | min   | max   | mean                                      | SE   | %                                                             | PR*               | PRadj <sup>i</sup> | 95%CI |      |
| <b>Unprocessed or minimally processed foods + Processed culinary ingredients</b> |       |       |       |                                           |      |                                                               |                   |                    |       |      |
| 1st                                                                              | 15.06 | 0.00  | 20.92 | 15.11                                     | 0.36 | 35.87                                                         | 1.00              | –                  | –     |      |
| 2nd                                                                              | 24.93 | 20.95 | 28.41 | 12.87                                     | 0.31 | 31.12                                                         | 0.85              | 0.87               | 0.79  | 0.96 |
| 3rd                                                                              | 31.65 | 28.43 | 34.96 | 11.97                                     | 0.31 | 30.87                                                         | 0.79              | 0.85               | 0.77  | 0.94 |
| 4th                                                                              | 38.95 | 34.97 | 43.88 | 11.01                                     | 0.28 | 28.45                                                         | 0.66              | 0.72               | 0.64  | 0.80 |
| 5th                                                                              | 54.24 | 43.93 | 91.90 | 9.89 <sup>‡</sup>                         | 0.25 | 25.28                                                         | 0.57 <sup>‡</sup> | 0.63 <sup>‡</sup>  | 0.55  | 0.71 |
| <b>Processed foods</b>                                                           |       |       |       |                                           |      |                                                               |                   |                    |       |      |
| 1st                                                                              | 0.28  | 0.00  | 1.32  | 13.09                                     | 0.50 | 59.14                                                         | 1.00              | 1.00               | –     |      |
| 2nd                                                                              | 2.60  | 1.34  | 3.79  | 12.82                                     | 0.41 | 60.65                                                         | 1.03              | 1.04               | 0.92  | 1.19 |
| 3rd                                                                              | 5.35  | 3.79  | 6.82  | 12.17                                     | 0.30 | 61.42                                                         | 1.04              | 1.04               | 0.92  | 1.18 |
| 4th                                                                              | 9.36  | 6.82  | 12.03 | 11.62                                     | 0.26 | 55.92                                                         | 0.95              | 0.98               | 0.87  | 1.11 |
| 5th                                                                              | 19.80 | 12.04 | 65.22 | 11.27 <sup>‡</sup>                        | 0.22 | 52.47                                                         | 0.89 <sup>‡</sup> | 0.92 <sup>‡</sup>  | 0.82  | 1.03 |
| <b>Ultra-processed foods</b>                                                     |       |       |       |                                           |      |                                                               |                   |                    |       |      |
| 1st                                                                              | 34.45 | 1.82  | 43.67 | 9.62                                      | 0.27 | 39.42                                                         | 1.00              | 1.00               | –     |      |
| 2nd                                                                              | 48.70 | 43.69 | 53.04 | 11.11                                     | 0.25 | 53.34                                                         | 1.35              | 1.30               | 1.13  | 1.50 |
| 3rd                                                                              | 57.08 | 53.06 | 60.96 | 11.83                                     | 0.29 | 56.84                                                         | 1.44              | 1.37               | 1.19  | 1.57 |
| 4th                                                                              | 65.34 | 60.96 | 70.14 | 13.09                                     | 0.32 | 66.31                                                         | 1.68              | 1.57               | 1.37  | 1.79 |
| 5th                                                                              | 78.04 | 70.15 | 100   | 15.21 <sup>‡</sup>                        | 0.38 | 74.30                                                         | 1.88 <sup>‡</sup> | 1.67 <sup>‡</sup>  | 1.46  | 1.92 |

\*PR=Prevalence ratios estimated using Poisson regression.

<sup>i</sup>PRadj=Prevalence ratios adjusted for sex, age, race/ethnicity (White, Mixed ethnic group, Black or Black British, Asian or Asian British and Other race), region, and household income.

<sup>‡</sup>Significant linear trend across all quintiles (p≤0.001).

**Table 5. Indicators of the dietary content in free sugars according to quintiles of the dietary contribution of NOVA food groups in the UK population aged 65 years or over (2008-14).**

| Dietary contribution (% of total energy intake)                                  |       |       |       | % of total energy intake from free sugars |      | Individuals with ≥10% of total energy intake from free sugars |                   |                    |       |      |
|----------------------------------------------------------------------------------|-------|-------|-------|-------------------------------------------|------|---------------------------------------------------------------|-------------------|--------------------|-------|------|
| Quintile                                                                         | mean  | min   | max   | mean                                      | SE   | %                                                             | PR*               | PRadj <sup>i</sup> | 95%CI |      |
| <b>Unprocessed or minimally processed foods + Processed culinary ingredients</b> |       |       |       |                                           |      |                                                               |                   |                    |       |      |
| 1st                                                                              | 16.63 | 6.34  | 20.82 | 11.67                                     | 0.87 | 56.16                                                         | 1.00              | 1.00               | –     | –    |
| 2nd                                                                              | 25.04 | 20.95 | 28.36 | 12.83                                     | 0.61 | 67.39                                                         | 1.20              | 1.19               | 0.90  | 1.57 |
| 3rd                                                                              | 32.06 | 28.44 | 34.90 | 11.98                                     | 0.48 | 64.37                                                         | 1.15              | 1.15               | 0.87  | 1.52 |
| 4th                                                                              | 39.30 | 34.98 | 43.85 | 10.93                                     | 0.44 | 53.96                                                         | 0.96              | 0.97               | 0.73  | 1.28 |
| 5th                                                                              | 52.26 | 43.89 | 78.36 | 10.70                                     | 0.42 | 50.94                                                         | 0.91 <sup>‡</sup> | 0.91 <sup>‡</sup>  | 0.69  | 1.21 |
| <b>Processed foods</b>                                                           |       |       |       |                                           |      |                                                               |                   |                    |       |      |
| 1st                                                                              | 0.38  | 0.00  | 1.32  | 9.70                                      | 0.72 | 43.52                                                         | 1.00              | 1.00               | –     | –    |
| 2nd                                                                              | 2.42  | 1.34  | 3.78  | 12.13                                     | 0.56 | 64.30                                                         | 1.48              | 1.49               | 1.14  | 1.96 |
| 3rd                                                                              | 5.23  | 3.79  | 6.81  | 12.16                                     | 0.45 | 65.00                                                         | 1.49              | 1.52               | 1.17  | 1.98 |
| 4th                                                                              | 9.27  | 6.82  | 12.02 | 11.10                                     | 0.47 | 54.46                                                         | 1.25              | 1.27               | 0.96  | 1.67 |
| 5th                                                                              | 19.10 | 12.04 | 50.86 | 11.23                                     | 0.46 | 53.62                                                         | 1.23              | 1.29               | 0.97  | 1.69 |
| <b>Ultra-processed foods</b>                                                     |       |       |       |                                           |      |                                                               |                   |                    |       |      |
| 1st                                                                              | 35.98 | 7.79  | 43.69 | 10.63                                     | 0.49 | 47.63                                                         | 1.00              | 1.00               | –     | –    |
| 2nd                                                                              | 48.67 | 43.74 | 53.02 | 11.30                                     | 0.48 | 58.67                                                         | 1.23              | 1.20               | 0.97  | 1.47 |
| 3rd                                                                              | 56.97 | 53.05 | 60.91 | 11.61                                     | 0.45 | 59.89                                                         | 1.26              | 1.21               | 0.98  | 1.50 |
| 4th                                                                              | 64.99 | 61.01 | 70.08 | 12.01                                     | 0.54 | 65.53                                                         | 1.38              | 1.35               | 1.09  | 1.66 |
| 5th                                                                              | 75.66 | 70.17 | 92.30 | 11.67                                     | 0.70 | 53.75                                                         | 1.13              | 1.06               | 0.81  | 1.40 |

\*PR=Prevalence ratios estimated using Poisson regression.

<sup>i</sup>PRadj=Prevalence ratios adjusted for sex, age, race/ethnicity (White, Mixed ethnic group, Black or Black British, Asian or Asian British and Other race), region, and household income.

<sup>‡</sup>Significant linear trend across all quintiles ( $p \leq 0.001$ ).

In our counterfactual scenarios, we calculated the percentage of excessive free sugar intake avoided if the consumption of ultra-processed foods and table sugar were zero (**Figure 1**). We estimated that about 47% of excessive free sugars intake in the UK population could be potentially avoided if the consumption of ultra-processed foods was eliminated. Eliminating table sugar could potentially avoid 9.4% of the excessive free sugars intake. This greater reduction in the percentage of excessive free sugar intake due to elimination of ultra-processed foods, relative to table sugar, was observed in all age groups, except in the elderly group where both scenarios had similar impacts on total free sugar intake.

## DISCUSSION

In this large, nationally representative sample of the UK population, higher consumption of ultra-processed food was associated with greater dietary content of free sugars in children, adolescents, and adults. We also showed that by eliminating ultra-processed food consumption, the prevalence of excessive free sugar intake (10% or more of total energy intake) could be potentially reduced from 60% to 28%. Greater reduction could be achieved in children (from 74% to 28%) and adolescents (from 83% to 29%).

Our findings confirm an excessive consumption of free sugars in the UK diet [13] and show that ultra-processed foods contributed nearly 65% of all free sugars in all age groups and nearly 80% in children and adolescents. Unprocessed or minimally processed foods (mostly fresh juice) and processed culinary ingredients (mostly table sugar) contributed between 19% and 27% of the dietary content of free sugars, while processed foods provided the lowest contribution in all age groups.

Our findings are similar to previous studies conducted in high- and middle-income countries that have shown strong associations between the intake of ultra-processed foods and the dietary content of free sugars [8-11]. A previous study conducted in Chile similarly showed that the association between ultra-processed food consumption and the dietary content of added sugars is more pronounced among children and adolescents [12]. In our study there was no association between ultra-processed food consumption and dietary content of free sugars among the elderly, probably due to differences in the type of ultra-processed foods consumed in this age group, with salted products more likely to be consumed than the sweetened products.

There is strong evidence that the high consumption of free sugars contributes to excess obesity, type 2 diabetes, dyslipidaemia, hypertension and coronary heart disease [2-4]. Consequently, most dietary recommendations now advise limiting free sugar intake, but

1  
2  
3 more focused efforts are needed to put this recommendation into practice. Changing  
4 personal behaviour and choice alone is not an effective or realistic option as our findings  
5 confirm that the majority of free sugar is added to food before it is marketed and sold.  
6 Voluntary agreements between industry and government have been shown repeatedly to  
7 be ineffective in improving public health [22]. This is confirmed by recent UK experience  
8 where the early stages of the government's sugar reduction programme, which challenged  
9 the food industry to voluntarily cut sugar in some products, has produced only slow  
10 progress toward proposed targets [23]. Thus, more drastic measures that change the  
11 availability, price and marketing of these products is necessary.  
12  
13  
14  
15  
16  
17  
18  
19

20 The analyses presented here suggest that actions to reduce the consumption of ultra-  
21 processed foods generally rich in free sugars could lead to larger public health benefits.  
22 Policies concerning the use of fiscal measures to reduce intake of free sugars and improve  
23 diet quality should consider extending beyond artificially sweetened beverages to include  
24 the main driver of excessive free sugar intake, including dairy drinks, cakes, biscuits and  
25 confectionery [13].  
26  
27  
28  
29  
30

31 To our knowledge, this is the first study to examine the association between  
32 consumption of ultra-processed foods, as defined per NOVA [6], and dietary content of free  
33 sugar in different age groups of the UK population. The use of NOVA is a key strength of the  
34 study as it classified foods by their level of processing level using standardised and objective  
35 criteria. NOVA has been recognised as a valid tool for public health and nutrition research  
36 and policy by the Food and Agricultural Organization of the United Nations [24] and the Pan  
37 American Health Organization [25]. In addition, we used data from the NDNS - a large and  
38 nationally representative sample of the UK population, applying weighting to reduce any  
39 sampling and non-response bias. Unlike household budget data, food diaries employed in  
40 the NDNS take food wastage into account, include food eaten out of home, and do not  
41 assume that all individuals within a household consume the same diet. Importantly, the  
42 dietary data also allowed for the disaggregation of dishes into their constituents and  
43 classification of the underlying ingredients, which enabled the calculation of more precise  
44 estimates of intakes of each NOVA group and reduced misclassification.  
45  
46  
47  
48  
49  
50  
51  
52  
53  
54  
55  
56  
57  
58  
59  
60

Potential limitations should be considered. The dietary data we used were self-reported and may be subject to misclassification. A constant limitation of dietary assessment methods is underreporting of some foods (particularly unhealthy foods), though food diaries are recognised to be one of the most comprehensive methods for assessing dietary intake. Possible underreporting of unhealthy foods may lead to an underestimation of the dietary contribution of ultra-processed foods and the overall intake of free sugars, but may less likely affect the association between these variables. Nevertheless, accurate and valid NDNS data were achieved through optimal methods for collecting dietary intake [26] which helped to minimise missing information. NDNS collects limited information indicative of food processing (for example, place of meals and product brands), which may lead to misclassification of food items. This bias is more likely for a small number of specific food items such as pizza where there is insufficient information for classification purposes (see **Suppl. Table S2**). In those cases, the most frequently consumed alternative (culinary preparation or manufactured product) was chosen.

## Conclusions

Almost half of excessive intake of free sugars in the UK can be attributed to ultra-processed foods. Policies to reduce sugar consumption should focus on minimizing consumption of ultra-processed foods and replacing them with unprocessed or minimally processed foods alternatives. The study adds to a growing body of evidence that ultra-processed foods are a major contributor to growth of diet related non-communicable diseases globally.

**Author contributions:** CAM, EMS, FR, MLdCL, and RBL designed the research. FR and RBL took care of data management and analyses. CAM, CM, EMS, FR, LFMR, MLdCL, and RBL interpreted the data. FR wrote the first draft of the manuscript. All authors read, edited and approved the final manuscript.

1  
2  
3 **Funding:** This work was supported by the Fundação de Amparo à Pesquisa do Estado de São  
4 Paulo (FAPESP), grant numbers 2015/14900-9, 2016/14302-7 (FR is a beneficiary of a  
5 postdoctoral fellowship), and 2014/25614-4 (LFMR is a beneficiary of a doctoral fellowship).  
6 FAPESP had no role in the design, analysis or writing of this manuscript.  
7  
8  
9

10  
11 **Competing interests:** None declared.  
12

13 **Data sharing statement:** This study is based on open data of the UK population that is  
14 available in the UK Data Archive website (<http://www.esds.ac.uk>).  
15  
16  
17  
18  
19  
20  
21  
22  
23  
24  
25  
26  
27  
28  
29  
30  
31  
32  
33  
34  
35  
36  
37  
38  
39  
40  
41  
42  
43  
44  
45  
46  
47  
48  
49  
50  
51  
52  
53  
54  
55  
56  
57  
58  
59  
60

**REFERENCES**

1. Scientific Advisory Committee on Nutrition. SACN's Sugars and Health Recommendations: Why 5%. London, UK: Scientific Advisory Committee on Nutrition, Department of Health, 2015.
2. Te Morenga LA, Howatson AJ, Jones RM, Mann J. Dietary sugars and cardiometabolic risk: systematic review and meta-analyses of randomized controlled trials of the effects on blood pressure and lipids. *Am J Clin Nutr* 2014;100(1):65-79.
3. Scientific Advisory Committee on Nutrition. Carbohydrates and Health Report. London, UK: Scientific Advisory Committee on Nutrition, Department of Health, 2015.
4. Te Morenga L, Mallard S, Mann J. Dietary sugars and body weight: systematic review and meta-analyses of randomised controlled trials and cohort studies. *BMJ* 2013;346:e7492.
5. World Health Organization. Sugars intake for adults and children. Geneva, Switzerland: World Health Organization, 2015.
6. Monteiro CA, Cannon G, Moubarac JC, Levy RB, Louzada ML, Jaime PC. The UN decade of nutrition, the NOVA food classification and the trouble with ultra-processing. *Public Health Nutr* 2018;21:5–17.
7. Martinez Steele E, Popkin BM, Swinburn B, Monteiro CA. The share of ultra-processed foods and the overall nutritional quality of diets in the US: evidence from a nationally representative cross-sectional study. *Popul Health Metr* 2017;15:6.
8. Moubarac JC, Batal M, Louzada ML, Martinez Steele E, Monteiro CA. Consumption of ultra-processed foods predicts diet quality in Canada. *Appetite* 2017;108:512-520.
9. Rauber F, da Costa Louzada ML, Steele EM, Millett C, Monteiro CA, Levy RB. Ultra-Processed Food Consumption and Chronic Non-Communicable Diseases-Related

- 1  
2  
3 Dietary Nutrient Profile in the UK (2008-2014). *Nutrients*. 2018;10(5) 9;10(5), pii:  
4 E587.  
5  
6  
7  
8 10. Martinez Steele E, Baraldi LG, Louzada ML, Moubarac JC, Mozaffarian D, Monteiro  
9 CA. Ultra-processed foods and added sugars in the US diet: evidence from a  
10 nationally representative cross-sectional study. *BMJ Open* 2016;6(3):e009892.  
11  
12  
13 11. Louzada M, Ricardo CZ, Steele EM, Levy RB, Cannon G, Monteiro CA. The share of  
14 ultra-processed foods determines the overall nutritional quality of diets in Brazil.  
15 *Public Health Nutr* 2018;21(1):94-102.  
16  
17  
18 12. Cediel G, Reyes M, da Costa Louzada ML, Martinez Steele E, Monteiro CA, Corvalán  
19 C, Uauy R. Ultra-processed foods and added sugars in the Chilean diet (2010). *Public*  
20 *Health Nutr* 2018;21(1):125-133.  
21  
22  
23 13. Public Health England. National Diet and Nutrition Survey Results from years 7 and  
24 8 (Combined) of the Rolling Programme (2014/2015 to 2015/2016). London, UK:  
25 Public Health England, 2018.  
26  
27  
28 14. Department of Health and Social Care: Global Public Health Directorate: Obesity,  
29 Food and Nutrition. Childhood obesity: a plan for action, Chapter 2. London, UK:  
30 Department of Health and Social Care, 2018.  
31  
32  
33 15. Public Health England. National Diet and Nutrition Survey Results from Years 1, 2, 3  
34 and 4 (Combined) of the Rolling Programme (2008/2009–2011/2012). London, UK:  
35 Public Health England, 2014.  
36  
37  
38 16. Fitt E, Cole D, Ziauddeen N, Pell D, Stickley E, Harvey A, Stephen AM. DINO (Diet In  
39 Nutrients Out) - an integrated dietary assessment system. *Public Health Nutr*  
40 2015;18(2):234-241.  
41  
42  
43 17. Public Health England. McCance and Widdowson's the composition of foods  
44 integrated dataset 2015. London, UK: Public Health England, 2015.  
45  
46  
47  
48  
49  
50  
51  
52  
53  
54  
55  
56  
57  
58  
59  
60



18. Monteiro CA, Cannon G, Levy RB, Moubarac JC, Jaime PC, Martins AP, Canella D, Louzada MLDC, Parra D. NOVA. The star shines bright. *World Nutrition* 2016;7(1-3):28-38.
19. Fitt E, Mak TN, Stephen AM, Prynne C, Roberts C, Swan G, Farron-Wilson M. Disaggregating composite food codes in the UK National Diet and Nutrition Survey food composition databank. *Eur J Clin Nutr* 2010;64 Suppl 3:S32-36.
20. White IR, Royston P, Wood AM. Multiple imputation using chained equations: Issues and guidance for practice. *Stat Med* 2011;30(4):377-399.
21. Nielsen SJ, Adair L. An alternative to dietary data exclusions. *J Am Diet Assoc* 2007;107(5):792-799.
22. Moodie R, Stuckler D, Monteiro CA, Sheron N, Neal B, Thamarangsi T, Lincoln P, Casswell S. Profits and pandemics: prevention of harmful effects of tobacco, alcohol, and ultra-processed food and drink industries. *Lancet* 2013;381(9867):670-679.
23. Public Health England. First measure of industry progress to cut sugar unveiled [press release]. London, UK: Public Health England, 2018.
24. Food and Agriculture Organization of the United Nations. Guidelines on the collection of information on food processing through food consumption surveys. Rome, Italy: Food and Agriculture Organization of the United Nations, 2015.
25. Pan American Health Organization. Ultra-processed Food and Drink Products in Latin America: Trends, Impact on Obesity, Policy Implications. Washington, DC: Pan American Health Organization, 2015.
26. Public Health England. Dietary data collection and editing. In *National Diet and Nutrition Survey. Results from years 1–4 (combined) of the Rolling Programme (2008/2009–2011/2012)*. London, UK: Public Health England, 2014. Available online: <https://www.gov.uk/government/statistics/national-diet-and-nutrition-survey-results-from-years-1-to-4-combined-of-the-rolling-programme-for-2008-and-2009-to-2011-and-2012> (accessed on 15 January 2018).

Figure 1.

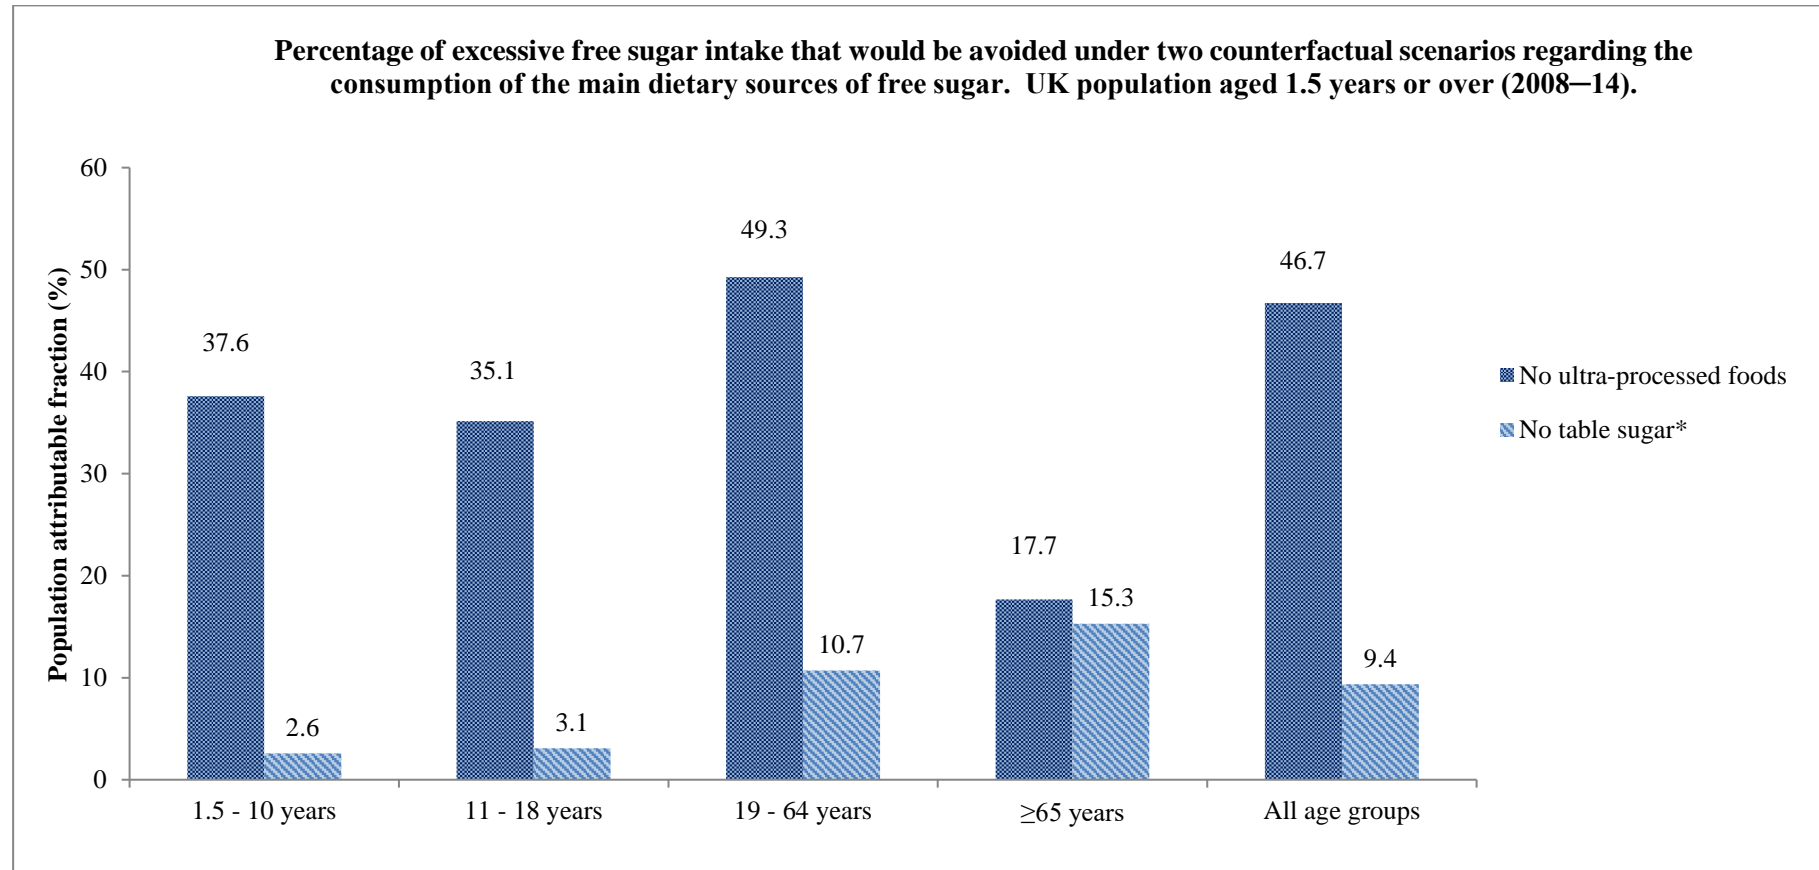

\*Including honey, molasses, maple syrup (100%).

1  
2  
3  
4 **Ultra-processed foods and excessive free sugar intake in the United Kingdom: a nationally**  
5 **representative cross-sectional study.**  
6  
7

8  
9 Fernanda Rauber <sup>1,2</sup>, Maria Laura da Costa Louzada <sup>1,3</sup>, Eurídice Martínez Steele <sup>1,2</sup>, Leandro  
10 Fórnias Machado de Rezende <sup>1,4</sup>, Christopher Millett <sup>1,5</sup>, Carlos Augusto Monteiro <sup>1,2</sup>, Renata  
11 Bertazzi Levy <sup>1,4</sup>  
12  
13  
14  
15

16 <sup>1</sup> Núcleo de Pesquisas Epidemiológicas em Nutrição e Saúde, Universidade de São Paulo, São  
17 Paulo, Brasil.

18 <sup>2</sup> Departamento de Nutrição, Faculdade de Saúde Pública, Universidade de São Paulo, São Paulo,  
19 Brasil.  
20

21 <sup>3</sup> Departamento de Políticas Públicas e Saúde Coletiva, Universidade Federal de São Paulo, São  
22 Paulo, Brasil.  
23

24 <sup>4</sup> Departamento de Medicina Preventiva, Faculdade de Medicina FMUSP, Universidade de São  
25 Paulo, São Paulo, Brasil.  
26

27 <sup>5</sup> Public Health Policy Evaluation Unit, School of Public Health, Imperial College London,  
28 London W6 8RP, United Kingdom.  
29  
30  
31  
32  
33  
34  
35  
36

37 **Corresponding author:** Fernanda Rauber, [rauber.fernanda@gmail.com](mailto:rauber.fernanda@gmail.com), Departamento de  
38 Nutrição, Faculdade de Saúde Pública, Universidade de São Paulo, Av. Dr. Arnaldo, 715, São  
39 Paulo 01246-907, Brasil.  
40  
41  
42  
43  
44  
45  
46  
47  
48  
49  
50  
51  
52  
53  
54  
55  
56  
57  
58  
59  
60

**Supplementary table S1. The Nova food classification system\***

| <b>Food groups</b>                                                                                                                                                                                                                                                                                                                                                                                                                                                                                                                                                                                                                                                                                           | <b>Examples</b>                                                                                                                                                                                                                                                                                                                                                                                                                                                                                                                                                                                                                      |
|--------------------------------------------------------------------------------------------------------------------------------------------------------------------------------------------------------------------------------------------------------------------------------------------------------------------------------------------------------------------------------------------------------------------------------------------------------------------------------------------------------------------------------------------------------------------------------------------------------------------------------------------------------------------------------------------------------------|--------------------------------------------------------------------------------------------------------------------------------------------------------------------------------------------------------------------------------------------------------------------------------------------------------------------------------------------------------------------------------------------------------------------------------------------------------------------------------------------------------------------------------------------------------------------------------------------------------------------------------------|
| <p><b>1) Unprocessed foods or minimally processed foods</b></p> <p>Natural foods altered by methods such as freezing, pasteurization, fermentation, removal of inedible or unwanted parts, grinding, and other methods that do not include the addition of substances such as salt, sugar and/or oils or fats.</p>                                                                                                                                                                                                                                                                                                                                                                                           | <p>Fresh, dry or frozen fruits or vegetables; legumes; grains, roots and tubers, flours and pasta; pasteurized or power plain milk and plain yogurt; fresh or frozen meat (fish, poultry and red meat); eggs; nuts and seeds; fungi; fresh or pasteurised fruit or vegetable juices without added sugar, sweeteners or flavours; tea, coffee and drinking water.</p>                                                                                                                                                                                                                                                                 |
| <p><b>2) Processed culinary ingredients</b></p> <p>Substances obtained directly from group 1 foods or from nature by processes that include pressing, refining, grinding, milling, and drying, and consumed in combination with group 1 foods in freshly prepared dishes or drinks.</p>                                                                                                                                                                                                                                                                                                                                                                                                                      | <p>Salt; sugar, honey and molasses; vegetable oils; butter and lard; starches extracted from corn and other plants.</p>                                                                                                                                                                                                                                                                                                                                                                                                                                                                                                              |
| <p><b>3) Processed foods</b></p> <p>Products manufactured with the addition of group 2 substances (e.g. salt, sugar, oil, and fats) to group 1 foods and alcoholic drinks produced by fermentation of group 1 foods such as beer, cider and wine.</p>                                                                                                                                                                                                                                                                                                                                                                                                                                                        | <p>Canned or bottled vegetables, fruits and legumes; salted or sugared nuts and seeds; salted, cured, or smoked meats; canned fish; fruits in syrup; cheeses and unpackaged freshly made breads.</p>                                                                                                                                                                                                                                                                                                                                                                                                                                 |
| <p><b>4) Ultra-processed foods</b></p> <p>Food and drink formulations made from several ingredients. Such ingredients include salt, sugar, oils, and fats but also other substances derived from foods but not commonly used as culinary ingredients (such as protein isolates, hydrogenated oils, modified starches) and additives used to imitate sensory quality of natural foods and freshly prepared dishes or to disguise unpalatable aspects of the final product (such as flavours, colours, sweeteners, emulsifiers). Alcoholic drinks produced by fermentation of group 1 foods followed by distillation of the resulting alcohol, such as whisky, gin, rum, vodka, are classified in group 4.</p> | <p>Carbonated drinks; sweet or savoury packaged snacks; confectionery; mass-produced packaged breads and buns; margarines and spreads; biscuits, pastries, cakes, and cake mixes; breakfast 'cereals', 'cereal' and 'energy' bars; 'energy' drinks; milk drinks, 'fruit' yoghurts and 'fruit' drinks; cocoa drinks; meat and chicken extracts and 'instant' sauces; ready to heat products including pre-prepared pies and pasta and pizza dishes; poultry and fish 'nuggets' and 'sticks', sausages, burgers, hot dogs, and other reconstituted meat products, and powdered and packaged 'instant' soups, noodles and desserts.</p> |

Adapted from Monteiro et al. (2016 and 2018).

Monteiro CA, Cannon G, Moubarac JC et al. (2018) The UN Decade of Nutrition, the NOVA food classification and the trouble with ultra-processing. *Public Health Nutr* 21, 5-17.

Monteiro CA, Cannon G, Levy RB, et al. NOVA. The star shines bright. *World Nutrition*. 2016;7(1-3):28-38.

**Supplementary Table S2. Coding of subsidiary food groups from National Diet and Nutrition Survey according to NOVA classification.**

| Subsidiary food group code | Subsidiary food group name                              | NOVA food group† |
|----------------------------|---------------------------------------------------------|------------------|
| 1C                         | Pizza                                                   | 4                |
| 1D                         | Pasta (manufactured products and ready meals)           | 4                |
| 1E                         | Pasta (other, including homemade dishes)                | *                |
| 1F                         | Rice (manufactured products and ready meals)            | 4                |
| 1G                         | Rice (other, including homemade dishes)                 | *                |
| 1R                         | Other cereals                                           | *                |
| 2R                         | White bread (not high fibre, not multiseed bread)       | 4                |
| 3R                         | Wholemeal bread                                         | 4                |
| 4R                         | Other bread                                             | 4                |
| 5R                         | High fibre breakfast cereals                            | 4                |
| 6R                         | Other breakfast cereals (not high fibre)                | 4                |
| 7A                         | Biscuits(manufactured/retail)                           | 4                |
| 7B                         | Biscuits (homemade)                                     | *                |
| 8B                         | Fruit pies (manufactured)                               | 4                |
| 8C                         | Fruit pies (homemade)                                   | *                |
| 8D                         | Buns cakes and pastries (manufactured)                  | 4                |
| 8E                         | Buns cakes and pastries (homemade)                      | *                |
| 9C                         | Cereal based milk puddings (manufactured)               | 4                |
| 9D                         | Cereal based milk puddings (homemade)                   | *                |
| 9E                         | Sponge puddings (manufactured)                          | 4                |
| 9F                         | Sponge puddings (homemade)                              | *                |
| 9G                         | Other cereal based puddings (manufactured)              | 4                |
| 9H                         | Other cereal based puddings (homemade)                  | *                |
| 10R                        | Whole milk                                              | 1                |
| 11R                        | Semi-skimmed milk                                       | 1                |
| 12R                        | Skimmed milk                                            | 1                |
| 13A                        | Infant formula                                          | 4                |
| 13B                        | Cream (including imitation cream)                       | *                |
| 13R                        | Other milk                                              | *                |
| 14A                        | Cottage cheese                                          | 3                |
| 14B                        | Cheddar cheese                                          | 3                |
| 14R                        | Other cheese                                            | *                |
| 15B                        | Yogurt                                                  | *                |
| 15C                        | Fromage frais and other dairy desserts (manufactured)   | 4                |
| 15D                        | Dairy desserts (homemade)                               | *                |
| 16C                        | Manufactured egg products, including ready meals        | 4                |
| 16D                        | Other eggs and egg dishes, including homemade           | *                |
| 17R                        | Butter                                                  | 2                |
| 18A                        | Polyunsaturated margarine                               | 4                |
| 18B                        | Polyunsaturated oils                                    | 2                |
| 19A                        | Polyunsaturated low fat spread                          | 4                |
| 19R                        | Low fat spread not polyunsaturated                      | 4                |
| 20A                        | Block margarine                                         | 4                |
| 20B                        | Soft margarine not polyunsaturated                      | 4                |
| 20C                        | Other cooking fats and oils not polyunsaturated         | 2                |
| 21A                        | Reduced fat spread (polyunsaturated)                    | 4                |
| 21B                        | Reduced fat spread (not polyunsaturated)                | 4                |
| 22A                        | Ready meals/meal centres based on bacon and ham         | 4                |
| 22B                        | Other bacon and ham (including homemade dishes)         | *                |
| 23A                        | Manufactured beef products (including ready meals)      | 4                |
| 23B                        | Other beef & veal (including homemade recipe dishes)    | *                |
| 24A                        | Manufactured lamb products (including ready meals)      | 4                |
| 24B                        | Other lamb (including homemade recipe dishes)           | *                |
| 25A                        | Manufactured pork products(including ready meals)       | 4                |
| 25B                        | Other pork (including homemade recipe dishes)           | *                |
| 26A                        | Manufactured coated chicken/turkey products             | 4                |
| 27A                        | Manufactured chicken products (including ready meals)   | 4                |
| 27B                        | Other chicken/turkey (including homemade recipe dishes) | *                |
| 28R                        | Liver and dishes                                        | *                |
| 29R                        | Burgers and kebabs purchased                            | 4                |
| 30A                        | Ready meals based on sausages                           | 4                |

1  
2  
3  
4  
5  
6  
7  
8  
9  
10  
11  
12  
13  
14  
15  
16  
17  
18  
19  
20  
21  
22  
23  
24  
25  
26  
27  
28  
29  
30  
31  
32  
33  
34  
35  
36  
37  
38  
39  
40  
41  
42  
43  
44  
45  
46  
47  
48  
49  
50  
51  
52  
53  
54  
55  
56  
57  
58  
59  
60

|     |                                                               |   |
|-----|---------------------------------------------------------------|---|
| 30B | Other sausages (including homemade dishes)                    | * |
| 31A | Meat pies and pastries (manufactured)                         | 4 |
| 31B | Meat pies and pastries (homemade)                             | * |
| 32A | Other meat products (manufactured including ready meals)      | 4 |
| 32B | Other meat (including homemade recipe dishes)                 | * |
| 33R | White fish coated or fried                                    | * |
| 34C | Manufactured white fish products (including ready meals)      | 4 |
| 34D | Other white fish (including homemade dishes)                  | * |
| 34E | Manufactured shellfish products (including ready meals)       | 4 |
| 34F | Other shellfish (including homemade dishes)                   | * |
| 34G | Manufactured canned tuna products (including ready meals)     | * |
| 34H | Other canned tuna (including homemade dishes)                 | * |
| 35A | Manufactured oily fish products (including ready meals)       | 4 |
| 35B | Other oily fish (including homemade dishes)                   | * |
| 36A | Carrots (raw)                                                 | 1 |
| 36B | Salad and other raw vegetables                                | * |
| 36C | Tomatoes raw                                                  | 1 |
| 37A | Peas not raw                                                  | * |
| 37B | Green beans not raw                                           | * |
| 37C | Baked beans                                                   | 4 |
| 37D | Leafy green vegetables not raw                                | * |
| 37E | Carrots not raw                                               | * |
| 37F | Tomatoes not raw                                              | * |
| 37I | Beans and pulses (including ready meal & homemade dishes)     | * |
| 37K | Meat alternatives (including ready meals and homemade dishes) | 4 |
| 37L | Other manufactured vegetable products (including ready meals) | 4 |
| 37M | Other vegetables (including homemade dishes)                  | * |
| 38A | Chips purchased including takeaway                            | 4 |
| 38C | Other manufactured potato products fried/baked                | 4 |
| 38D | Other fried/roast potatoes (including homemade dishes)        | * |
| 39A | Other potato products and dishes(manufactured)                | 4 |
| 39B | Other potatoes (including homemade dishes)                    | * |
| 40A | Apples and pears not canned                                   | * |
| 40B | Citrus fruit not canned                                       | * |
| 40C | Bananas                                                       | * |
| 40D | Canned fruit in juice                                         | * |
| 40E | Canned fruit in syrup                                         | 3 |
| 40R | Other fruit not canned                                        | * |
| 41A | Sugar                                                         | * |
| 41B | Preserves                                                     | 3 |
| 41R | Sweet spreads fillings and icing                              | 4 |
| 42R | Crisps and savoury snacks                                     | 4 |
| 43R | Sugar confectionery                                           | 4 |
| 44R | Chocolate confectionery                                       | 4 |
| 45R | Fruit juice                                                   | * |
| 47A | Liqueurs                                                      | 4 |
| 47B | Spirits                                                       | 4 |
| 48A | Wine                                                          | 3 |
| 48B | Fortified wine                                                | 4 |
| 48C | Low alcohol and alcohol free wine                             | 3 |
| 49A | Beers and lagers                                              | 3 |
| 49B | Low alcohol & alcohol free beer & lager                       | 3 |
| 49C | Cider and Perry                                               | 4 |
| 49D | Low alcohol & alcohol free cider & Perry                      | 4 |
| 49E | Alcoholic soft drinks (Alcopops)                              | 4 |
| 50A | Beverages dry weight                                          | 4 |
| 50C | Soup (manufactured/retail)                                    | 4 |
| 50D | Soup (homemade)                                               | * |
| 50E | Nutrition powders and drinks                                  | 4 |
| 50R | Savoury sauces pickles gravies & condiments                   | 4 |
| 51A | Coffee (made up weight)                                       | * |
| 51B | Tea (made up)                                                 | * |
| 51C | Herbal tea (made up)                                          | 1 |
| 51D | Bottled water still or carbonated                             | * |
| 51R | Tap water only                                                | 1 |
| 52A | Commercial toddlers drinks                                    | 3 |
| 52R | Commercial toddlers foods                                     | 3 |

1  
2  
3  
4  
5  
6  
7  
8  
9  
10  
11  
12  
13  
14  
15  
16  
17  
18  
19  
20  
21  
22  
23  
24  
25  
26  
27  
28  
29  
30  
31  
32  
33  
34  
35  
36  
37  
38  
39  
40  
41  
42  
43  
44  
45  
46  
47  
48  
49  
50  
51  
52  
53  
54  
55  
56  
57  
58  
59  
60

|     |                                                                     |    |
|-----|---------------------------------------------------------------------|----|
| 53R | Ice cream                                                           | 4  |
| 54A | Cod liver oil and other fish oils                                   | ** |
| 54B | Evening primrose oil and other plant oils                           | ** |
| 54C | Single vitamins/minerals not Folic acid, iron, calcium              | ** |
| 54D | Folic acid                                                          | ** |
| 54E | Iron only or with vitamin C                                         | ** |
| 54F | Calcium only or with vitamin D                                      | ** |
| 54G | Vitamins (two or more including multivitamins) no minerals          | ** |
| 54H | Minerals (two or more including multimineral) no vitamins           | ** |
| 54I | Vitamins and minerals (including multivitamins & minerals)          | ** |
| 54J | Non-nutrient supplements (including herbal)                         | ** |
| 54K | Other nutrient supplements                                          | ** |
| 54L | Vitamin C                                                           | ** |
| 54M | Single vitamins/minerals not Folic acid, iron, calcium or vitamin C | ** |
| 54N | Cod liver oil and other fish oils (including with vitamins A, D, E) | ** |
| 54P | Multivitamins and/or minerals with omega ultra-processed            | ** |
| 55R | Artificial sweeteners                                               | 4  |
| 56R | Nuts and seeds                                                      | *  |
| 57A | Soft drinks not low calorie concentrated                            | 4  |
| 57B | Soft drinks not low calorie carbonated                              | 4  |
| 57C | Soft drinks not low calorie, ready to drink, still                  | 4  |
| 58A | Soft drinks low calorie concentrated                                | 4  |
| 58B | Soft drinks low calorie carbonated                                  | 4  |
| 58C | Soft drinks low calorie, ready to drink, still                      | 4  |
| 59R | Brown, granary and wheat germ bread                                 | 4  |
| 60R | 1% Milk                                                             | 1  |
| 61R | Smoothies                                                           | 1  |

† NOVA food groups defined as 1) unprocessed or minimally processed foods; 2) processed culinary ingredients; 3) processed foods; and 4) ultra-processed foods.

\* All foods within this subsidiary food group were individually coded (by food name).

\*\* Supplements were not included in any of the NOVA food groups.

Source: Rauber F, Louzada MLC, Steele EM, Millett C, Monteiro CA, Levy RB. Ultra-Processed Food Consumption and Chronic Non-Communicable Diseases-Related Dietary Nutrient Profile in the UK (2008–2014). *Nutrients* 2018, 10, 587; doi:10.3390/nu10050587.

**Supplementary table S3. Dietary content in free sugars according to age groups. UK population aged 1.5 years or over (2008–14).**

| Age groups            | % of total energy intake from free sugars |             | Individuals with $\geq 5\%$ of total energy intake from free sugars |              |              |
|-----------------------|-------------------------------------------|-------------|---------------------------------------------------------------------|--------------|--------------|
|                       | mean                                      | SE          | %                                                                   | 95%CI        |              |
| 1.5 - 10 years        | 14.00                                     | 0.14        | 97.16                                                               | 96.29        | 97.84        |
| 11 - 18 years         | 15.78                                     | 0.19        | 96.77                                                               | 95.62        | 97.62        |
| 19 - 64 years         | 11.93                                     | 0.14        | 88.82                                                               | 87.48        | 90.04        |
| $\geq 65$ years       | 11.36                                     | 0.23        | 87.62                                                               | 84.88        | 89.93        |
| <b>All age groups</b> | <b>12.44</b>                              | <b>0.10</b> | <b>90.34</b>                                                        | <b>89.39</b> | <b>91.21</b> |



**Supplementary table S4. Indicators of the dietary content in free sugars according to quintiles of the dietary contribution of NOVA food groups in the UK population aged 1.5 years or over (2008-14).**

| Dietary contribution (% of total energy intake)                                  |       |       |        | % of total energy intake from free sugars |      | Individuals with ≥5% of total energy intake from free sugars |                   |                    |       | Individuals with ≥10% of total energy intake from free sugars |       |                   |                    |       |      |
|----------------------------------------------------------------------------------|-------|-------|--------|-------------------------------------------|------|--------------------------------------------------------------|-------------------|--------------------|-------|---------------------------------------------------------------|-------|-------------------|--------------------|-------|------|
| Quintile                                                                         | mean  | min   | max    | mean                                      | SE   | %                                                            | PR*               | PRadj <sup>†</sup> | 95%CI |                                                               | %     | PR*               | PRadj <sup>†</sup> | 95%CI |      |
| <b>Unprocessed or minimally processed foods + Processed culinary ingredients</b> |       |       |        |                                           |      |                                                              |                   |                    |       |                                                               |       |                   |                    |       |      |
| 1st                                                                              | 15.10 | 0.00  | 20.92  | 15.36                                     | 0.24 | 95.94                                                        | 1.00              | 1.00               | —     | —                                                             | 77.42 | 1.00              | 1.00               | —     | —    |
| 2nd                                                                              | 24.90 | 20.92 | 28.43  | 13.44                                     | 0.22 | 94.28                                                        | 0.98              | 0.99               | 0.97  | 1.01                                                          | 68.55 | 0.89              | 0.92               | 0.86  | 0.97 |
| 3rd                                                                              | 31.68 | 28.43 | 34.96  | 12.62                                     | 0.21 | 91.92                                                        | 0.96              | 0.97               | 0.95  | 1.00                                                          | 65.09 | 0.84              | 0.89               | 0.84  | 0.95 |
| 4th                                                                              | 39.08 | 34.97 | 43.88  | 11.46                                     | 0.21 | 89.70                                                        | 0.93              | 0.96               | 0.93  | 0.98                                                          | 55.09 | 0.71              | 0.77               | 0.72  | 0.83 |
| 5th                                                                              | 53.57 | 43.88 | 91.90  | 10.32 <sup>‡</sup>                        | 0.19 | 82.41                                                        | 0.86              | 0.89               | 0.86  | 0.92                                                          | 46.36 | 0.60 <sup>‡</sup> | 0.67 <sup>‡</sup>  | 0.61  | 0.73 |
| <b>Processed foods</b>                                                           |       |       |        |                                           |      |                                                              |                   |                    |       |                                                               |       |                   |                    |       |      |
| 1st                                                                              | 0.32  | 0.00  | 1.33   | 13.53                                     | 0.29 | 87.19                                                        | 1.00              | 1.00               | —     | —                                                             | 64.14 | 1.00              | 1.00               | —     | —    |
| 2nd                                                                              | 2.55  | 1.34  | 3.79   | 13.48                                     | 0.24 | 92.34                                                        | 1.06              | 1.06               | 1.03  | 1.10                                                          | 67.93 | 1.06              | 1.08               | 1.01  | 1.16 |
| 3rd                                                                              | 5.28  | 3.79  | 6.82   | 12.83                                     | 0.19 | 92.39                                                        | 1.06              | 1.07               | 1.03  | 1.10                                                          | 67.10 | 1.05              | 1.08               | 1.00  | 1.16 |
| 4th                                                                              | 9.28  | 6.82  | 12.03  | 11.89                                     | 0.20 | 90.61                                                        | 1.04              | 1.06               | 1.02  | 1.09                                                          | 58.87 | 0.92              | 0.98               | 0.91  | 1.06 |
| 5th                                                                              | 19.54 | 12.04 | 65.22  | 11.38 <sup>‡</sup>                        | 0.19 | 89.40                                                        | 1.03              | 1.04               | 1.01  | 1.08                                                          | 53.70 | 0.84 <sup>‡</sup> | 0.91 <sup>‡</sup>  | 0.84  | 0.98 |
| <b>Ultra-processed foods</b>                                                     |       |       |        |                                           |      |                                                              |                   |                    |       |                                                               |       |                   |                    |       |      |
| 1st                                                                              | 34.89 | 1.82  | 43.69  | 9.94                                      | 0.22 | 80.50                                                        | 1.00              | 1.00               | —     | —                                                             | 41.87 | 1.00              | 1.00               | —     | —    |
| 2nd                                                                              | 48.74 | 43.69 | 53.04  | 11.34                                     | 0.20 | 89.16                                                        | 1.11              | 1.10               | 1.05  | 1.15                                                          | 56.35 | 1.35              | 1.31               | 1.18  | 1.46 |
| 3rd                                                                              | 57.06 | 53.05 | 60.96  | 12.16                                     | 0.21 | 92.65                                                        | 1.15              | 1.14               | 1.09  | 1.18                                                          | 60.76 | 1.45              | 1.39               | 1.25  | 1.54 |
| 4th                                                                              | 65.37 | 60.96 | 70.14  | 13.38                                     | 0.21 | 94.08                                                        | 1.17              | 1.15               | 1.10  | 1.19                                                          | 70.18 | 1.68              | 1.55               | 1.41  | 1.72 |
| 5th                                                                              | 78.06 | 70.14 | 100.00 | 15.41 <sup>‡</sup>                        | 0.21 | 95.30                                                        | 1.18 <sup>‡</sup> | 1.15 <sup>‡</sup>  | 1.10  | 1.19                                                          | 77.20 | 1.84 <sup>‡</sup> | 1.64 <sup>‡</sup>  | 1.48  | 1.81 |

\*PR=Prevalence ratios estimated using Poisson regression.

<sup>†</sup>PRadj=Prevalence ratios adjusted for sex, age, race/ethnicity (White, Mixed ethnic group, Black or Black British, Asian or Asian British and Other race), region, and household income.

<sup>‡</sup>Significant linear trend across all quintiles (p≤0.001).

STROBE Statement—Checklist of items that should be included in reports of *cross-sectional studies*

|                              | Item No | Recommendation                                                                                                                                                                                    | Page No |
|------------------------------|---------|---------------------------------------------------------------------------------------------------------------------------------------------------------------------------------------------------|---------|
| <b>Title and abstract</b>    | 1       | (a) Indicate the study's design with a commonly used term in the title or the abstract                                                                                                            | 1, 2    |
|                              |         | (b) Provide in the abstract an informative and balanced summary of what was done and what was found                                                                                               | 1, 2    |
| <b>Introduction</b>          |         |                                                                                                                                                                                                   |         |
| Background/rationale         | 2       | Explain the scientific background and rationale for the investigation being reported                                                                                                              | 4       |
| Objectives                   | 3       | State specific objectives, including any prespecified hypotheses                                                                                                                                  | 4       |
| <b>Methods</b>               |         |                                                                                                                                                                                                   |         |
| Study design                 | 4       | Present key elements of study design early in the paper                                                                                                                                           | 5       |
| Setting                      | 5       | Describe the setting, locations, and relevant dates, including periods of recruitment, exposure, follow-up, and data collection                                                                   | 5       |
| Participants                 | 6       | (a) Give the eligibility criteria, and the sources and methods of selection of participants                                                                                                       | 5       |
| Variables                    | 7       | Clearly define all outcomes, exposures, predictors, potential confounders, and effect modifiers. Give diagnostic criteria, if applicable                                                          | 6-8     |
| Data sources/<br>measurement | 8*      | For each variable of interest, give sources of data and details of methods of assessment (measurement). Describe comparability of assessment methods if there is more than one group              | 6-8     |
| Bias                         | 9       | Describe any efforts to address potential sources of bias                                                                                                                                         | 6,7     |
| Study size                   | 10      | Explain how the study size was arrived at                                                                                                                                                         | 5       |
| Quantitative variables       | 11      | Explain how quantitative variables were handled in the analyses. If applicable, describe which groupings were chosen and why                                                                      | 7,8     |
| Statistical methods          | 12      | (a) Describe all statistical methods, including those used to control for confounding                                                                                                             | 7-9     |
|                              |         | (b) Describe any methods used to examine subgroups and interactions                                                                                                                               | 7,9     |
|                              |         | (c) Explain how missing data were addressed                                                                                                                                                       | 7       |
|                              |         | (d) If applicable, describe analytical methods taking account of sampling strategy                                                                                                                | 9       |
|                              |         | (e) Describe any sensitivity analyses                                                                                                                                                             | NA      |
| <b>Results</b>               |         |                                                                                                                                                                                                   |         |
| Participants                 | 13*     | (a) Report numbers of individuals at each stage of study—eg numbers potentially eligible, examined for eligibility, confirmed eligible, included in the study, completing follow-up, and analysed | 7       |
|                              |         | (b) Give reasons for non-participation at each stage                                                                                                                                              | NA      |
|                              |         | (c) Consider use of a flow diagram                                                                                                                                                                | NA      |
| Descriptive data             | 14*     | (a) Give characteristics of study participants (eg demographic, clinical, social) and information on exposures and potential confounders                                                          | NA      |
|                              |         | (b) Indicate number of participants with missing data for each variable of interest                                                                                                               | 7       |

|                          |     |                                                                                                                                                                                                              |       |
|--------------------------|-----|--------------------------------------------------------------------------------------------------------------------------------------------------------------------------------------------------------------|-------|
| Outcome data             | 15* | Report numbers of outcome events or summary measures                                                                                                                                                         | 9     |
| Main results             | 16  | (a) Give unadjusted estimates and, if applicable, confounder-adjusted estimates and their precision (eg, 95% confidence interval). Make clear which confounders were adjusted for and why they were included | 10-15 |
|                          |     | (b) Report category boundaries when continuous variables were categorized                                                                                                                                    |       |
|                          |     | (c) If relevant, consider translating estimates of relative risk into absolute risk for a meaningful time period                                                                                             | NA    |
| Other analyses           | 17  | Report other analyses done—eg analyses of subgroups and interactions, and sensitivity analyses                                                                                                               | 8     |
| <b>Discussion</b>        |     |                                                                                                                                                                                                              |       |
| Key results              | 18  | Summarise key results with reference to study objectives                                                                                                                                                     | 16    |
| Limitations              | 19  | Discuss limitations of the study, taking into account sources of potential bias or imprecision. Discuss both direction and magnitude of any potential bias                                                   | 17,18 |
| Interpretation           | 20  | Give a cautious overall interpretation of results considering objectives, limitations, multiplicity of analyses, results from similar studies, and other relevant evidence                                   | 18    |
| Generalisability         | 21  | Discuss the generalisability (external validity) of the study results                                                                                                                                        | 17    |
| <b>Other information</b> |     |                                                                                                                                                                                                              |       |
| Funding                  | 22  | Give the source of funding and the role of the funders for the present study and, if applicable, for the original study on which the present article is based                                                | 18    |

\*Give information separately for exposed and unexposed groups.

**Note:** An Explanation and Elaboration article discusses each checklist item and gives methodological background and published examples of transparent reporting. The STROBE checklist is best used in conjunction with this article (freely available on the Web sites of PLoS Medicine at <http://www.plosmedicine.org/>, Annals of Internal Medicine at <http://www.annals.org/>, and Epidemiology at <http://www.epidem.com/>). Information on the STROBE Initiative is available at [www.strobe-statement.org](http://www.strobe-statement.org).

# BMJ Open

## Ultra-processed foods and excessive free sugar intake in the United Kingdom: a nationally representative cross-sectional study

|                                 |                                                                                                                                                                                                                                                                                                                                                                                                                                                                                                                                                                                                                                                                                                                                                                                                                                                                                                                                                                                                                                                                                                                                                                                                                                                                                                  |
|---------------------------------|--------------------------------------------------------------------------------------------------------------------------------------------------------------------------------------------------------------------------------------------------------------------------------------------------------------------------------------------------------------------------------------------------------------------------------------------------------------------------------------------------------------------------------------------------------------------------------------------------------------------------------------------------------------------------------------------------------------------------------------------------------------------------------------------------------------------------------------------------------------------------------------------------------------------------------------------------------------------------------------------------------------------------------------------------------------------------------------------------------------------------------------------------------------------------------------------------------------------------------------------------------------------------------------------------|
| Journal:                        | <i>BMJ Open</i>                                                                                                                                                                                                                                                                                                                                                                                                                                                                                                                                                                                                                                                                                                                                                                                                                                                                                                                                                                                                                                                                                                                                                                                                                                                                                  |
| Manuscript ID                   | bmjopen-2018-027546.R1                                                                                                                                                                                                                                                                                                                                                                                                                                                                                                                                                                                                                                                                                                                                                                                                                                                                                                                                                                                                                                                                                                                                                                                                                                                                           |
| Article Type:                   | Original research                                                                                                                                                                                                                                                                                                                                                                                                                                                                                                                                                                                                                                                                                                                                                                                                                                                                                                                                                                                                                                                                                                                                                                                                                                                                                |
| Date Submitted by the Author:   | 15-Apr-2019                                                                                                                                                                                                                                                                                                                                                                                                                                                                                                                                                                                                                                                                                                                                                                                                                                                                                                                                                                                                                                                                                                                                                                                                                                                                                      |
| Complete List of Authors:       | Rauber, Fernanda; Universidade de Sao Paulo, Departamento de Nutrição; Universidade de Sao Paulo, Núcleo de Pesquisas Epidemiológicas em Nutrição e Saúde<br>Louzada, Maria Laura; Universidade Federal de Sao Paulo, Departamento de Políticas Públicas e Saúde Coletiva; Universidade de Sao Paulo, Núcleo de Pesquisas Epidemiológicas em Nutrição e Saúde<br>Martinez Steele, Euridice; Universidade de Sao Paulo, Departamento de Nutrição; Universidade de Sao Paulo, Núcleo de Pesquisas Epidemiológicas em Nutrição e Saúde<br>Rezende, Leandro; Universidade de Sao Paulo, Departamento de Medicina Preventiva, Faculdade de Medicina ; Universidade de Sao Paulo, Núcleo de Pesquisas Epidemiológicas em Nutrição e Saúde<br>Millett, Christopher; Imperial College London, Public Health Policy Evaluation Unit, School of Public Health; Universidade de Sao Paulo, Núcleo de Pesquisas Epidemiológicas em Nutrição e Saúde<br>Monteiro, Carlos; Universidade de Sao Paulo, Departamento de Nutrição; Universidade de Sao Paulo, Núcleo de Pesquisas Epidemiológicas em Nutrição e Saúde<br>Levy, Renata; Universidade de Sao Paulo, Departamento de Medicina Preventiva, Faculdade de Medicina ; Universidade de Sao Paulo, Núcleo de Pesquisas Epidemiológicas em Nutrição e Saúde |
| <b>Primary Subject Heading</b>: | Public health                                                                                                                                                                                                                                                                                                                                                                                                                                                                                                                                                                                                                                                                                                                                                                                                                                                                                                                                                                                                                                                                                                                                                                                                                                                                                    |
| Secondary Subject Heading:      | Epidemiology, Nutrition and metabolism                                                                                                                                                                                                                                                                                                                                                                                                                                                                                                                                                                                                                                                                                                                                                                                                                                                                                                                                                                                                                                                                                                                                                                                                                                                           |
| Keywords:                       | Food processing, Ultra-processed, Free sugar, United Kingdom                                                                                                                                                                                                                                                                                                                                                                                                                                                                                                                                                                                                                                                                                                                                                                                                                                                                                                                                                                                                                                                                                                                                                                                                                                     |
|                                 |                                                                                                                                                                                                                                                                                                                                                                                                                                                                                                                                                                                                                                                                                                                                                                                                                                                                                                                                                                                                                                                                                                                                                                                                                                                                                                  |

SCHOLARONE™  
Manuscripts

1  
2  
3 **Ultra-processed foods and excessive free sugar intake in the United Kingdom: a**  
4 **nationally representative cross-sectional study**  
5  
6

7 Fernanda Rauber <sup>1,2</sup>, Maria Laura da Costa Louzada <sup>1,3</sup>, Eurídice Martínez Steele <sup>1,2</sup>,  
8 Leandro Fórniás Machado de Rezende <sup>1,4</sup>, Christopher Millett <sup>1,5</sup>, Carlos Augusto  
9 Monteiro <sup>1,2</sup>, Renata Bertazzi Levy <sup>1,4</sup>  
10  
11  
12  
13

14  
15 <sup>1</sup> Núcleo de Pesquisas Epidemiológicas em Nutrição e Saúde, Universidade de São Paulo,  
16 São Paulo, Brasil.

17  
18 <sup>2</sup> Departamento de Nutrição, Faculdade de Saúde Pública, Universidade de São Paulo,  
19 São Paulo, Brasil.

20  
21 <sup>3</sup> Departamento de Políticas Públicas e Saúde Coletiva, Universidade Federal de São  
22 Paulo, São Paulo, Brasil.

23  
24 <sup>4</sup> Departamento de Medicina Preventiva, Faculdade de Medicina FMUSP, Universidade  
25 de São Paulo, São Paulo, Brasil.

26  
27 <sup>5</sup> Public Health Policy Evaluation Unit, School of Public Health, Imperial College London,  
28 London, United Kingdom.  
29  
30  
31  
32  
33

34  
35  
36  
37 **Corresponding author:** Fernanda Rauber, [rauber.fernanda@gmail.com](mailto:rauber.fernanda@gmail.com), Departamento  
38 de Nutrição, Faculdade de Saúde Pública, Universidade de São Paulo, Av. Dr. Arnaldo,  
39 715, São Paulo 01246-904, Brasil.  
40  
41  
42  
43

44 **Word count:** 3,586  
45  
46  
47  
48  
49  
50  
51  
52  
53  
54  
55  
56  
57  
58  
59  
60

## ABSTRACT

**Objectives:** to describe dietary sources of free sugars in different age groups of the UK population considering food groups classified according to the NOVA system and to estimate the proportion of excessive free sugars that could potentially be avoided by reducing consumption of their main sources.

**Design and setting:** Cross-sectional data from the UK National Diet and Nutrition Survey (2008–14) were analysed. Food items collected using a four-day food diary were classified according to the NOVA system.

**Participants:** 9,364 individuals aged 1.5 years and above.

**Main outcome measures:** Average dietary content of free sugars and proportion of individuals consuming more than 10% of total energy from free sugars.

**Data analysis:** Poisson regression was used to estimate the associations between each of the NOVA food group and intake of free sugars. We also estimated population attributable fraction for excessive free sugar intake associated with consumption of ultra-processed foods and table sugar. Analyses were stratified by age group and adjusted for age, sex, ethnicity, region, and equivalised household income (sterling pounds).

**Results:** Ultra-processed foods account for 56.8% of total energy intake and 64.7% of total free sugars in the UK diet. Free sugars represent 12.4% of total energy intake and 61.3% of the sample exceeded the recommended limit of 10% energy from free sugars. This percentage was higher among children (74.9%) and adolescents (82.9%). Excessive free sugar intake increased linearly across quintiles of ultra-processed food consumption for all age groups, except among the elderly. We estimated that 47% of excessive free sugars intake in the UK population could be avoided if the consumption of ultra-processed foods was eliminated.

**Conclusion:** Our findings suggest that actions to reduce the ultra-processed food consumption generally rich in free sugars could lead to substantial public health benefits.

**Keywords:** Food processing; Ultra-processed; Free sugar; United Kingdom.

## ARTICLE SUMMARY

### Strengths and limitations of this study

- Use of a large and nationally representative sample of the UK population, increasing generalisability.
- Use of data on free sugars rather than total sugars or sugar-sweetened beverages, which correspond to the guidelines relevant area of prioritisation.
- Use of NOVA system, which has been recognised as a valid tool for public health and nutrition research and policy by international organizations.
- Dietary data obtained by food diaries are subject to potential error and bias.
- UK national dietary survey collects limited information indicative of food processing (for example, place of meals and product brands), which may lead to misclassification of food items.

## INTRODUCTION

Excessive consumption of free sugar is associated with obesity, type 2 diabetes, dental caries, and several other health outcomes [1-4]. To address this associated health burden, the World Health Organization (WHO) [5] recommends that free sugars should be reduced to less than 10% of total energy intake and also suggests a level below 5% to obtain additional health benefits, such as reduction of dental caries. Achievement of this ambitious target will require bold and systematic efforts to reduce sugar across a variety of food products in most settings.

As defined by the NOVA food classification system, ultra-processed foods are industrial formulations of many ingredients, mostly of exclusive industrial use, that result from a sequence of industrial processes (hence ultra-processed) [6]. In some high-income countries, including the UK, ultra-processed foods account for more than half of total dietary energy intake [7-9]. Importantly, national dietary surveys conducted in high- and middle-income countries [8-12] have shown a strong and positive association between consumption of ultra-processed foods and excessive dietary added (or free) sugar intake. Free sugars include sugars added to foods by the manufacturer, cook and consumer, plus sugars naturally present in honey, syrups and fruit juices [5], while added sugars captures all free sugars, but exclude naturally occurring sugars in fruit juices.

Free sugar intake in the UK is high, ranging from 11 to 15% of total energy intake [13]. To address this, the UK has implemented a number of measures including a sugar-sweetened beverage levy in 2018. However, action on sugar sweetened beverages alone is unlikely to reduce population level sugar intake to WHO recommended levels. In a more recent publication, the voluntary sugar reduction programme continues being endorsed by the government, but other measures such as restriction of advertising and in-store promotions of some sugary foods are also being considered as strategies to reduce childhood obesity [14]. A better understanding of the key sources of sugar intake in the UK diet is required to inform policy development. This study aims to describe the dietary sources of free sugars in different age groups of the UK population taking into account food groups classified according to the NOVA classification system and estimate



1  
2  
3 the proportion of excessive free sugars that could be potentially avoided by reducing  
4 the consumption of their main dietary sources.  
5  
6  
7  
8

## 9 **METHODS**

### 10 **Data source and collection**

11  
12  
13  
14  
15  
16  
17  
18  
19 We used data from the National Diet and Nutrition Survey Rolling Programme  
20 (NDNS) years 1-6 (2008/09-2009/10, 2010/11-2011/12, 2012/13-2013/14) combined,  
21 which is a cross-sectional survey of people aged 1.5 years or older. The survey was  
22 designed to be representative of the UK population and provides comprehensive  
23 information on food intake. Details of the rationale, design, and methods of the survey  
24 have been described elsewhere [15]. Briefly, the sample was drawn from households  
25 randomly selected from the UK Postcode Address File, a list of all UK addresses. One  
26 adult (aged 19 years and older) and one child (aged 1.5–18 years), if available, were  
27 randomly selected from each household. Only a child was selected from some  
28 households to be part of a 'child boost' to ensure approximately equal numbers of  
29 children and adults. Participants (or in the case of children  $\leq 11$  years, their parent/carer)  
30 completed a four-day food diary and participated in an interview that included data on  
31 socio-demographic status.  
32  
33  
34  
35  
36  
37  
38  
39  
40  
41  
42

43 Participants were asked to report all foods and drinks consumed both within and  
44 outside the home. Portion sizes were estimated using household measures or weights  
45 from packaging. Once completed, diaries were checked by interviewers with  
46 respondents and missing details added to improve completeness. Diary days were  
47 randomly selected to ensure balanced representation of all days of the week. All  
48 individuals who completed three or four days of dietary recording were eligible for  
49 inclusion in the study, giving a sample size of 9,374 (4,738 adults and 4,636 children)  
50 participants for years 1 to 6 (2008/09 to 2013/14) combined.  
51  
52  
53  
54  
55  
56  
57

58 The food intake data from completed records were coded and edited using the  
59 software DINO (Diet In, Nutrients Out) and food and nutrient intakes estimated using  
60

1  
2  
3 nutrient composition data from the Department of Health's Nutrient Databank, updated  
4 for each survey year [16, 17]. Free sugars are defined as sugars added to foods by the  
5 manufacturer, cook or consumer, plus sugars naturally present in honey, syrups, fruit  
6 juices and fruit concentrates [5]. Intakes in the UK NDNS years 1-6 were expressed as  
7 non-milk extrinsic sugars (NMES). The term NMES captures all sugars defined by the  
8 term free sugars while also including half of the sugars present in dried, stewed or  
9 canned fruit. The NMES values could be slightly higher in some cases than the free sugar  
10 values, mostly in the non-ultra-processed food group since the term free sugar does not  
11 include sugars contributed by dried and processed fruits. Based on the assumption that  
12 those definitions are sufficiently similar for assessment and monitoring purposes [1,3],  
13 this study used the term free sugars.  
14  
15  
16  
17  
18  
19  
20  
21  
22

23  
24 Computerized raw data files and documentation from this survey were obtained  
25 under license from the UK Data Archive (<http://www.esds.ac.uk>). All relevant research  
26 ethics and governance committees approved the survey.  
27  
28  
29  
30  
31

### 32 **Food classification according to processing**

33  
34  
35  
36

37 We classified all recorded food items according to NOVA, a food classification  
38 system based on the nature, extent, and purpose of the industrial food processing [6].  
39 This classification includes four groups: 1) unprocessed or minimally processed foods  
40 (e.g. fresh, dry or frozen fruits or vegetables; grains, flours and pasta; pasteurized or  
41 power plain milk, plain yogurt, fresh or frozen meat); 2) processed culinary ingredients  
42 (e.g. table sugar, oils, butter, and salt); 3) processed foods (e.g. vegetables in brine,  
43 cheese, simple breads, fruits in syrup, canned fish); and 4) ultra-processed foods (e.g.  
44 soft drinks, sweet or savoury packaged snacks, confectionery; packaged breads and  
45 buns; reconstituted meat products and pre-prepared frozen or shelf-stable dishes) (**see**  
46 **Suppl. Table S1**). The detailed description of NOVA classification can be found elsewhere  
47 [6, 18].  
48  
49  
50  
51  
52  
53  
54  
55  
56

57 All foods in NDNS are coded as food number and grouped into subsidiary food  
58 groups (n = 155). When possible, subsidiary food groups were directly classified  
59  
60

1  
2  
3 according to NOVA (**see Suppl. Table S2**). When foods within a subsidiary food group  
4 pertained to different NOVA groups ( $n = 52$ ), it was the food codes instead of the group,  
5 which were individually classified. By doing so, we were able to classify each underlying  
6 ingredient of homemade dishes in its corresponding NOVA group. Subsidiary food  
7 groups as classified by NOVA are described in the Supplementary Table S2.  
8  
9  
10  
11

12  
13 Although the NDNS database was provided with most food items systematically  
14 disaggregated into their individual components, about 4% of composite food codes were  
15 still mixed dishes compiled from two or more single-ingredient food code [19]. The  
16 method we adopted to disaggregate food codes has been described previously [19].  
17 Using the core sample of years 1 to 4 (2008/09 to 2011/12) ( $n = 4,125$ ), we estimated  
18 that composite food codes represented only 3% of total calories. In this case, dishes  
19 were categorised according to the main constituent ingredient. Dishes in which a main  
20 constituent ingredient was not clearly identified (e.g. chicken and vegetable soup) were  
21 classified as a specific subgroup of freshly prepared dishes based on one or more  
22 unprocessed or minimally processed food (group 1). Non-caloric supplements were not  
23 included in the analyses.  
24  
25  
26  
27  
28  
29  
30  
31  
32  
33  
34  
35

### 36 **Covariates**

37  
38  
39  
40 Covariates included were age (years), sex, ethnicity (White, Mixed ethnic group,  
41 Black or Black British, Asian or Asian British and Other race), region (England North,  
42 England Central/Midlands, England South (including London), Scotland, Wales, and  
43 Northern Ireland), survey year (years 1-6), and equivalised household income  
44 (equivalised for different household sizes and composition using the McClements  
45 equivalence scale [15]). Due to the significant proportion of missing values for the  
46 equivalised household income (12.8%), we applied multiple imputation by chained  
47 equation method based on age, sex, ethnicity, excessive free sugars intake and ultra-  
48 processed food consumption. Multiple imputation was performed 20 times, and the  
49 Monte Carlo error analysis showed good statistical reproducibility of the results [20].  
50  
51  
52  
53  
54  
55  
56  
57  
58  
59  
60

## Data analysis

For each survey day and age group (1.5 – 10 years, 11 – 18 years, 19 – 64 years, and  $\geq 64$  years), we defined extreme total energy intake outliers as values below the 1<sup>st</sup> and above the 99th percentiles [21]. Based on these criteria, we excluded ten individuals who had all days of food diary classified as outliers. In total, 9,364 (4,729 adults and 4,635 children) participants were eligible for inclusion in the analyses and more than 91% completed the four food diary days. We used the mean of all available days of food diary for each individual.

Food items were sorted into mutually exclusive food groups according to NOVA classification. We combined the group of unprocessed or minimally processed foods with the group of processed culinary ingredients, as foods belonging to these two groups are usually combined together in culinary preparations and, therefore, consumed together. Thus, we performed the analyses considering three groups of foods: unprocessed or minimally processed foods and processed culinary ingredients, processed foods, and ultra-processed foods.

First, we estimated the distribution of total energy and free sugars intake according to the food groups. Then, we calculated the mean free sugars intake of the overall diet and the prevalence of excessive intake of free sugars. We used the WHO recommendations [5] to assess the excessive intake of free sugars ( $\geq 10\%$  of total energy). Analyses using the UK recommendations to further limit free sugars intake to less than 5% of total energy intake are presented in a supplementary table (**Suppl. Table S3**). Analyses were carried out for the entire population and also stratified by age group.

Next, the prevalence of excessive intake of free sugars ( $\geq 10\%$  of total energy) was compared across quintiles of the energy share provided by each of the three food groups. Poisson regression was used to estimate prevalence ratios (PR) and 95% confidence intervals for the associations between each of the three NOVA food group quintiles and prevalence of individuals consuming more than 10% of total energy from free sugars. Tests of linear trend were performed to evaluate the quintiles as a single continuous variable. All analyses were stratified by age group. Multiple regression models were also performed to adjust for age, sex, ethnicity, region, survey year, and

1  
2  
3 equivalised household income (sterling pounds). Analyses using the entire population  
4 are presented in a supplementary table (**Suppl. Table S4**). We also evaluated the extent  
5 to which the association between the exposure (dietary contribution of NOVA food  
6 groups) and the dietary content in free sugars changed according to the survey year, by  
7 including a multiplicative interaction term (survey year\*dietary contribution of NOVA  
8 food groups) in the fully adjusted models.  
9

10  
11  
12  
13  
14 Finally, we estimated the proportion of excessive free sugar intake that could be  
15 potentially avoided if exposure to the risk factors were eliminated (theoretical minimum  
16 risk exposure level scenarios) [22, 23]. The counterfactual scenarios were defined  
17 considering the main dietary sources of free sugars. The first counterfactual scenario  
18 assumed no consumption of ultra-processed food (potentially hidden sugars), while in  
19 the second scenario table sugar consumption was set to zero. Table sugar included  
20 honey, molasses, maple syrup (100%), and sugar added to coffee/juice and homemade  
21 dishes (potentially sugar that can be measured by the consumer). Examples of  
22 homemade dishes include: biscuits, fruit pies, buns cakes and pastries, cereal based milk  
23 puddings, and sponge pudding (**see Suppl. Table S2**).  
24

25  
26  
27  
28  
29  
30  
31  
32  
33  
34  
35  
36  
37  
38  
39  
40  
41  
42  
43  
44  
45  
46  
47  
48  
49  
50  
51  
52  
53  
54  
55  
56  
57  
58  
59  
60  
In both scenarios, we first calculated the prevalence of excessive free sugar intake  
in the UK population ( $P_{population}$ ). We then estimated the predicted prevalence of  
excessive free sugar intake that would be expected had the consumption of each of  
these main sources of free sugars being zero ( $P_{nonexposed}$ ). Lastly, we calculated the  
proportion of excessive free sugar intake that could be potentially avoided in each  
scenario using the following formula:  $(P_{population} - P_{nonexposed}) / P_{population}$ . Prevalences were  
adjusted for sex, age, ethnicity, region, survey year, and household income.'

NDNS study weights were used in all analyses to account for sampling and non-  
response error. All statistical analyses were carried out using Stata Statistical Software  
version 14. The  $p$  values reported were two-tailed, and a threshold of <0.01 was  
considered for statistically significant associations.

### **Patient and public involvement**

Patients and/or public were not involved in this study.

## RESULTS

Ultra-processed foods account for 56.8% of total energy intake and 64.7% of total free sugars in the UK diet. Unprocessed or minimally processed foods and processed culinary ingredients represented an additional 34.3% of total energy intake and 23.8% of free sugars, and processed foods the remaining 8.8% of total energy intake and 11.5% of free sugars. Ultra-processed foods accounted for a higher percentage of total energy intake among children (63.5%) and adolescents (68%). The average UK daily intake of free sugars was 12.4% (SE 0.1) of total energy intake and 61.3% of British exceeded the recommended limit of 10% energy from free sugars. This proportion was even higher among children (74.9%) and adolescents (82.9%) (**Table 1**).

Table 1. Dietary contribution of NOVA food groups and indicators of the dietary content in free sugars according to age groups. UK population aged 1.5 years or over (2008–14).

| Age groups     | Dietary contribution (% of total energy intake)                           |             |                 |             |                       |             | % of total energy intake from free sugars                                 |             |                 |             |                       |             | Individuals with ≥10% of total energy intake from free sugars |             |              |              |              |
|----------------|---------------------------------------------------------------------------|-------------|-----------------|-------------|-----------------------|-------------|---------------------------------------------------------------------------|-------------|-----------------|-------------|-----------------------|-------------|---------------------------------------------------------------|-------------|--------------|--------------|--------------|
|                | Unprocessed or minimally processed foods + Processed culinary ingredients |             | Processed foods |             | Ultra-processed foods |             | Unprocessed or minimally processed foods + Processed culinary ingredients |             | Processed foods |             | Ultra-processed foods |             | Total                                                         |             | Overall diet |              |              |
|                |                                                                           |             | <i>Mean SE</i>  |             |                       |             |                                                                           |             | <i>Mean SE</i>  |             |                       |             |                                                               |             | <i>%</i>     | <i>95%CI</i> |              |
| 1.5 - 10 years | 31.96                                                                     | 0.33        | 4.51            | 0.10        | 63.53                 | 0.34        | 18.82                                                                     | 0.45        | 5.15            | 0.22        | 76.03                 | 0.49        | 14.00                                                         | 0.14        | 74.94        | 72.78        | 76.99        |
| 11 - 18 years  | 27.25                                                                     | 0.37        | 4.75            | 0.16        | 68.00                 | 0.40        | 18.63                                                                     | 0.55        | 2.48            | 0.19        | 78.89                 | 0.57        | 15.78                                                         | 0.19        | 82.91        | 80.72        | 84.90        |
| 19 - 64 years  | 34.75                                                                     | 0.32        | 10.37           | 0.19        | 54.89                 | 0.35        | 24.68                                                                     | 0.50        | 12.96           | 0.38        | 62.36                 | 0.56        | 11.93                                                         | 0.14        | 56.59        | 54.47        | 58.68        |
| ≥65 years      | 38.57                                                                     | 0.49        | 8.45            | 0.29        | 52.98                 | 0.52        | 26.77                                                                     | 0.96        | 15.38           | 0.69        | 57.86                 | 1.01        | 11.36                                                         | 0.23        | 56.83        | 52.98        | 60.59        |
| <b>Total</b>   | <b>34.35</b>                                                              | <b>0.22</b> | <b>8.83</b>     | <b>0.13</b> | <b>56.82</b>          | <b>0.24</b> | <b>23.78</b>                                                              | <b>0.36</b> | <b>11.46</b>    | <b>0.27</b> | <b>64.75</b>          | <b>0.40</b> | <b>12.44</b>                                                  | <b>0.10</b> | <b>61.27</b> | <b>59.76</b> | <b>62.76</b> |

For peer review only

1  
2  
3 No significant interaction was observed between the exposure and the survey year  
4 for the total energy intake from free sugars (unprocessed or minimally processed foods  
5 + processed culinary ingredients:  $p = 0.254$ ; processed foods:  $p = 0.538$ ; ultra-processed  
6 foods:  $p = 0.137$ ), nor for the prevalence of excessive intake of free sugars (unprocessed  
7 or minimally processed foods + processed culinary ingredients:  $p = 0.609$ ; processed  
8 foods:  $p = 0.262$ ; ultra-processed foods:  $p = 0.258$ ). Even so, we included variable survey  
9 year (1-6) in the adjusted model.  
10  
11  
12  
13  
14  
15

16 Indicators of the dietary content in free sugars according to quintiles of the dietary  
17 contribution of NOVA food groups stratified by age groups are shown in **Tables 2 to 5**  
18 (1.5 – 10 years, 11 – 18 years, 19 – 64 years, and  $\geq 64$  years, respectively). The dietary  
19 contents of free sugars increased linearly across quintiles of ultra-processed food  
20 consumption for children (from 10.4% in the lowest quintile to 15.3% in the highest  
21 quintile), adolescents (from 12.7% to 17.4%, respectively) and adults (from 9.6% to  
22 15.2%, respectively), whereas the increase for elderly was not significant (from 10.6% to  
23 11.7%, respectively). The prevalence of excessive free sugar intake also increased  
24 linearly across quintiles of ultra-processed food consumption for all age groups, except  
25 among the elderly group. Children in the highest quintiles of ultra-processed food  
26 consumption had a prevalence of excessive free sugar intake 60% higher (PRadj 1.6; 95%  
27 CI 1.3 to 1.9) than those in the lowest quintile group. The same trend was observed for  
28 adolescents (PRadj 1.6 95% IC 1.2 – 1.9) and adults (PRadj 1.7 95% IC 1.5 – 1.9), while  
29 no difference in prevalence was observed for elderly (PRadj 1.1 95% IC 0.8 – 1.4).  
30  
31  
32  
33  
34  
35  
36  
37  
38  
39  
40  
41

42 Opposite trends were observed for the group of unprocessed or minimally  
43 processed foods and processed culinary ingredients, where the prevalence of excessive  
44 free sugars intake decreased from the first to the last quintile of these food groups in all  
45 age groups. The prevalence of excessive free sugars intake also decreased from the first  
46 to the last quintile of processed foods, but only in adolescents and adults.  
47  
48  
49  
50  
51  
52  
53  
54  
55  
56  
57  
58  
59  
60



**Table 2. Indicators of the dietary content in free sugars according to quintiles of the dietary contribution of NOVA food groups in the UK population aged 1.5 - 10 years (2008-14).**

| Dietary contribution (% of total energy intake)                                  |             |            |            | % of total energy intake from free sugars |           | Individuals with $\geq 10\%$ of total energy intake from free sugars |                   |                          |              |      |
|----------------------------------------------------------------------------------|-------------|------------|------------|-------------------------------------------|-----------|----------------------------------------------------------------------|-------------------|--------------------------|--------------|------|
| <i>Quintile</i>                                                                  | <i>mean</i> | <i>min</i> | <i>max</i> | <i>mean</i>                               | <i>SE</i> | <i>%</i>                                                             | <i>PR*</i>        | <i>PRadj<sup>i</sup></i> | <i>95%CI</i> |      |
| <b>Unprocessed or minimally processed foods + Processed culinary ingredients</b> |             |            |            |                                           |           |                                                                      |                   |                          |              |      |
| 1st                                                                              | 15.36       | 0.00       | 20.92      | 15.80                                     | 0.33      | 82.99                                                                | 1.00              | 1.00                     | –            | –    |
| 2nd                                                                              | 24.86       | 20.93      | 28.41      | 14.60                                     | 0.30      | 79.62                                                                | 0.96              | 0.95                     | 0.89         | 1.02 |
| 3rd                                                                              | 31.57       | 28.46      | 34.96      | 14.37                                     | 0.28      | 81.68                                                                | 0.98              | 0.99                     | 0.93         | 1.06 |
| 4th                                                                              | 39.30       | 34.98      | 43.86      | 13.66                                     | 0.36      | 73.40                                                                | 0.88              | 0.91                     | 0.84         | 0.99 |
| 5th                                                                              | 52.46       | 43.97      | 79.93      | 11.13 <sup>‡</sup>                        | 0.26      | 53.87                                                                | 0.65 <sup>‡</sup> | 0.69 <sup>‡</sup>        | 0.61         | 0.78 |
| <b>Processed foods</b>                                                           |             |            |            |                                           |           |                                                                      |                   |                          |              |      |
| 1st                                                                              | 0.41        | 0.00       | 1.33       | 13.93                                     | 0.29      | 72.58                                                                | 1.00              | 1.00                     | –            | –    |
| 2nd                                                                              | 2.56        | 1.34       | 3.79       | 14.82                                     | 0.30      | 80.23                                                                | 1.11              | 1.11                     | 1.03         | 1.19 |
| 3rd                                                                              | 5.18        | 3.79       | 6.82       | 13.77                                     | 0.25      | 73.85                                                                | 1.02              | 1.04                     | 0.95         | 1.13 |
| 4th                                                                              | 8.96        | 6.83       | 11.95      | 13.37                                     | 0.31      | 73.23                                                                | 1.01              | 1.02                     | 0.93         | 1.12 |
| 5th                                                                              | 16.05       | 12.04      | 41.71      | 13.16                                     | 0.52      | 69.20                                                                | 0.95              | 0.99                     | 0.86         | 1.14 |
| <b>Ultra-processed foods</b>                                                     |             |            |            |                                           |           |                                                                      |                   |                          |              |      |
| 1st                                                                              | 36.38       | 15.11      | 43.67      | 10.35                                     | 0.38      | 46.41                                                                | 1.00              | 1.00                     | –            | –    |
| 2nd                                                                              | 49.00       | 43.72      | 53.03      | 12.37                                     | 0.30      | 66.78                                                                | 1.44              | 1.39                     | 1.15         | 1.70 |
| 3rd                                                                              | 57.17       | 53.06      | 60.95      | 13.84                                     | 0.37      | 74.22                                                                | 1.60              | 1.50                     | 1.24         | 1.81 |
| 4th                                                                              | 65.58       | 60.96      | 70.14      | 14.48                                     | 0.26      | 80.95                                                                | 1.74              | 1.62                     | 1.35         | 1.95 |
| 5th                                                                              | 78.05       | 70.15      | 100        | 15.32 <sup>‡</sup>                        | 0.25      | 81.41                                                                | 1.75 <sup>‡</sup> | 1.62 <sup>‡</sup>        | 1.35         | 1.95 |

\*PR=Prevalence ratios estimated using Poisson regression.

<sup>i</sup>PRadj=Prevalence ratios adjusted for sex, age, race/ethnicity (White, Mixed ethnic group, Black or Black British, Asian or Asian British and Other race), region, survey year, and household income.

<sup>‡</sup>Significant linear trend across all quintiles ( $p \leq 0.001$ ).

**Table 3. Indicators of the dietary content in free sugars according to quintiles of the dietary contribution of NOVA food groups in the UK population aged 11 - 18 years (2008-14).**

| Dietary contribution (% of total energy intake)                                  |             |            |            | % of total energy intake from free sugars |           | Individuals with $\geq 10\%$ of total energy intake from free sugars |                   |                          |              |      |
|----------------------------------------------------------------------------------|-------------|------------|------------|-------------------------------------------|-----------|----------------------------------------------------------------------|-------------------|--------------------------|--------------|------|
| <i>Quintile</i>                                                                  | <i>mean</i> | <i>min</i> | <i>max</i> | <i>mean</i>                               | <i>SE</i> | <i>%</i>                                                             | <i>PR*</i>        | <i>PRadj<sup>i</sup></i> | <i>95%CI</i> |      |
| <b>Unprocessed or minimally processed foods + Processed culinary ingredients</b> |             |            |            |                                           |           |                                                                      |                   |                          |              |      |
| 1st                                                                              | 14.43       | 0.00       | 20.89      | 17.28                                     | 0.36      | 88.89                                                                | 1.00              | 1.00                     | –            | –    |
| 2nd                                                                              | 24.61       | 20.92      | 28.43      | 15.87                                     | 0.35      | 84.30                                                                | 0.95              | 0.95                     | 0.89         | 1.01 |
| 3rd                                                                              | 31.46       | 28.44      | 34.93      | 15.50                                     | 0.37      | 81.82                                                                | 0.92              | 0.92                     | 0.86         | 0.99 |
| 4th                                                                              | 39.24       | 34.98      | 43.84      | 13.96                                     | 0.43      | 78.15                                                                | 0.88              | 0.89                     | 0.82         | 0.96 |
| 5th                                                                              | 52.96       | 43.88      | 79.86      | 13.60 <sup>‡</sup>                        | 0.80      | 66.92                                                                | 0.75 <sup>‡</sup> | 0.77 <sup>‡</sup>        | 0.66         | 0.88 |
| <b>Processed foods</b>                                                           |             |            |            |                                           |           |                                                                      |                   |                          |              |      |
| 1st                                                                              | 0.29        | 0.00       | 1.33       | 17.18                                     | 0.41      | 85.11                                                                | 1.00              | 1.00                     | –            | –    |
| 2nd                                                                              | 2.56        | 1.34       | 3.79       | 15.81                                     | 0.35      | 81.74                                                                | 0.96              | 0.96                     | 0.90         | 1.03 |
| 3rd                                                                              | 5.16        | 3.80       | 6.81       | 15.62                                     | 0.35      | 86.87                                                                | 1.02              | 1.02                     | 0.96         | 1.09 |
| 4th                                                                              | 8.94        | 6.82       | 11.95      | 14.52                                     | 0.43      | 79.40                                                                | 0.93              | 0.93                     | 0.86         | 1.01 |
| 5th                                                                              | 17.53       | 12.05      | 41.62      | 13.68 <sup>‡</sup>                        | 0.57      | 74.89                                                                | 0.88 <sup>‡</sup> | 0.87 <sup>‡</sup>        | 0.78         | 0.99 |
| <b>Ultra-processed foods</b>                                                     |             |            |            |                                           |           |                                                                      |                   |                          |              |      |
| 1st                                                                              | 35.29       | 18.40      | 42.94      | 12.72                                     | 1.39      | 56.18                                                                | 1.00              | 1.00                     | –            | –    |
| 2nd                                                                              | 49.35       | 43.70      | 53.03      | 13.65                                     | 0.56      | 75.73                                                                | 1.35              | 1.34                     | 1.03         | 1.74 |
| 3rd                                                                              | 56.91       | 53.08      | 60.96      | 14.19                                     | 0.40      | 79.24                                                                | 1.41              | 1.40                     | 1.09         | 1.80 |
| 4th                                                                              | 65.63       | 60.96      | 70.13      | 14.99                                     | 0.32      | 80.76                                                                | 1.44              | 1.42                     | 1.11         | 1.82 |
| 5th                                                                              | 79.05       | 70.14      | 100        | 17.37 <sup>‡</sup>                        | 0.29      | 89.04                                                                | 1.58 <sup>‡</sup> | 1.56 <sup>‡</sup>        | 1.23         | 1.99 |

\*PR=Prevalence ratios estimated using Poisson regression.

<sup>i</sup>PRadj=Prevalence ratios adjusted for sex, age, race/ethnicity (White, Mixed ethnic group, Black or Black British, Asian or Asian British and Other race), region, survey year, and household income.

<sup>‡</sup>Significant linear trend across all quintiles ( $p \leq 0.001$ ).

**Table 4. Indicators of the dietary content in free sugars according to quintiles of the dietary contribution of NOVA food groups in the UK population aged 19 - 64 years (2008-14).**

| Dietary contribution (% of total energy intake)                                  |             |            |            | % of total energy intake from free sugars |           | Individuals with $\geq 10\%$ of total energy intake from free sugars |                   |                          |              |      |
|----------------------------------------------------------------------------------|-------------|------------|------------|-------------------------------------------|-----------|----------------------------------------------------------------------|-------------------|--------------------------|--------------|------|
| <i>Quintile</i>                                                                  | <i>mean</i> | <i>min</i> | <i>max</i> | <i>mean</i>                               | <i>SE</i> | <i>%</i>                                                             | <i>PR*</i>        | <i>PRadj<sup>i</sup></i> | <i>95%CI</i> |      |
| <b>Unprocessed or minimally processed foods + Processed culinary ingredients</b> |             |            |            |                                           |           |                                                                      |                   |                          |              |      |
| 1st                                                                              | 15.06       | 0.00       | 20.92      | 15.11                                     | 0.36      | 35.87                                                                | 1.00              | –                        | –            |      |
| 2nd                                                                              | 24.93       | 20.95      | 28.41      | 12.87                                     | 0.31      | 31.12                                                                | 0.85              | 0.87                     | 0.79         | 0.96 |
| 3rd                                                                              | 31.65       | 28.43      | 34.96      | 11.97                                     | 0.31      | 30.87                                                                | 0.79              | 0.85                     | 0.77         | 0.94 |
| 4th                                                                              | 38.95       | 34.97      | 43.88      | 11.01                                     | 0.28      | 28.45                                                                | 0.66              | 0.72                     | 0.64         | 0.80 |
| 5th                                                                              | 54.24       | 43.93      | 91.90      | 9.89 <sup>‡</sup>                         | 0.25      | 25.28                                                                | 0.57 <sup>‡</sup> | 0.62 <sup>‡</sup>        | 0.55         | 0.71 |
| <b>Processed foods</b>                                                           |             |            |            |                                           |           |                                                                      |                   |                          |              |      |
| 1st                                                                              | 0.28        | 0.00       | 1.32       | 13.09                                     | 0.50      | 59.14                                                                | 1.00              | 1.00                     | –            | –    |
| 2nd                                                                              | 2.60        | 1.34       | 3.79       | 12.82                                     | 0.41      | 60.65                                                                | 1.03              | 1.04                     | 0.92         | 1.19 |
| 3rd                                                                              | 5.35        | 3.79       | 6.82       | 12.17                                     | 0.30      | 61.42                                                                | 1.04              | 1.04                     | 0.92         | 1.18 |
| 4th                                                                              | 9.36        | 6.82       | 12.03      | 11.62                                     | 0.26      | 55.92                                                                | 0.95              | 0.98                     | 0.87         | 1.11 |
| 5th                                                                              | 19.80       | 12.04      | 65.22      | 11.27 <sup>‡</sup>                        | 0.22      | 52.47                                                                | 0.89 <sup>‡</sup> | 0.92 <sup>‡</sup>        | 0.82         | 1.03 |
| <b>Ultra-processed foods</b>                                                     |             |            |            |                                           |           |                                                                      |                   |                          |              |      |
| 1st                                                                              | 34.45       | 1.82       | 43.67      | 9.62                                      | 0.27      | 39.42                                                                | 1.00              | 1.00                     | –            | –    |
| 2nd                                                                              | 48.70       | 43.69      | 53.04      | 11.11                                     | 0.25      | 53.34                                                                | 1.35              | 1.30                     | 1.13         | 1.50 |
| 3rd                                                                              | 57.08       | 53.06      | 60.96      | 11.83                                     | 0.29      | 56.84                                                                | 1.44              | 1.37                     | 1.19         | 1.57 |
| 4th                                                                              | 65.34       | 60.96      | 70.14      | 13.09                                     | 0.32      | 66.31                                                                | 1.68              | 1.57                     | 1.37         | 1.79 |
| 5th                                                                              | 78.04       | 70.15      | 100        | 15.21 <sup>‡</sup>                        | 0.38      | 74.30                                                                | 1.88 <sup>‡</sup> | 1.67 <sup>‡</sup>        | 1.46         | 1.92 |

\*PR=Prevalence ratios estimated using Poisson regression.

<sup>i</sup>PRadj=Prevalence ratios adjusted for sex, age, race/ethnicity (White, Mixed ethnic group, Black or Black British, Asian or Asian British and Other race), region, survey year, and household income.

<sup>‡</sup>Significant linear trend across all quintiles ( $p \leq 0.001$ ).

**Table 5. Indicators of the dietary content in free sugars according to quintiles of the dietary contribution of NOVA food groups in the UK population aged 65 years or over (2008-14).**

| Dietary contribution (% of total energy intake)                                  |       |       |       | % of total energy intake from free sugars |      | Individuals with ≥10% of total energy intake from free sugars |                   |                    |       |      |
|----------------------------------------------------------------------------------|-------|-------|-------|-------------------------------------------|------|---------------------------------------------------------------|-------------------|--------------------|-------|------|
| Quintile                                                                         | mean  | min   | max   | mean                                      | SE   | %                                                             | PR*               | PRadj <sup>†</sup> | 95%CI |      |
| <b>Unprocessed or minimally processed foods + Processed culinary ingredients</b> |       |       |       |                                           |      |                                                               |                   |                    |       |      |
| 1st                                                                              | 16.63 | 6.34  | 20.82 | 11.67                                     | 0.87 | 56.16                                                         | 1.00              | 1.00               | –     | –    |
| 2nd                                                                              | 25.04 | 20.95 | 28.36 | 12.83                                     | 0.61 | 67.39                                                         | 1.20              | 1.19               | 0.90  | 1.57 |
| 3rd                                                                              | 32.06 | 28.44 | 34.90 | 11.98                                     | 0.48 | 64.37                                                         | 1.15              | 1.15               | 0.87  | 1.52 |
| 4th                                                                              | 39.30 | 34.98 | 43.85 | 10.93                                     | 0.44 | 53.96                                                         | 0.96              | 0.97               | 0.73  | 1.28 |
| 5th                                                                              | 52.26 | 43.89 | 78.36 | 10.70                                     | 0.42 | 50.94                                                         | 0.91 <sup>‡</sup> | 0.91 <sup>‡</sup>  | 0.69  | 1.21 |
| <b>Processed foods</b>                                                           |       |       |       |                                           |      |                                                               |                   |                    |       |      |
| 1st                                                                              | 0.38  | 0.00  | 1.32  | 9.70                                      | 0.72 | 43.52                                                         | 1.00              | 1.00               | –     | –    |
| 2nd                                                                              | 2.42  | 1.34  | 3.78  | 12.13                                     | 0.56 | 64.30                                                         | 1.48              | 1.49               | 1.14  | 1.96 |
| 3rd                                                                              | 5.23  | 3.79  | 6.81  | 12.16                                     | 0.45 | 65.00                                                         | 1.49              | 1.52               | 1.17  | 1.98 |
| 4th                                                                              | 9.27  | 6.82  | 12.02 | 11.10                                     | 0.47 | 54.46                                                         | 1.25              | 1.27               | 0.96  | 1.67 |
| 5th                                                                              | 19.10 | 12.04 | 50.86 | 11.23                                     | 0.46 | 53.62                                                         | 1.23              | 1.29               | 0.97  | 1.69 |
| <b>Ultra-processed foods</b>                                                     |       |       |       |                                           |      |                                                               |                   |                    |       |      |
| 1st                                                                              | 35.98 | 7.79  | 43.69 | 10.63                                     | 0.49 | 47.63                                                         | 1.00              | 1.00               | –     | –    |
| 2nd                                                                              | 48.67 | 43.74 | 53.02 | 11.30                                     | 0.48 | 58.67                                                         | 1.23              | 1.20               | 0.97  | 1.47 |
| 3rd                                                                              | 56.97 | 53.05 | 60.91 | 11.61                                     | 0.45 | 59.89                                                         | 1.26              | 1.21               | 0.98  | 1.50 |
| 4th                                                                              | 64.99 | 61.01 | 70.08 | 12.01                                     | 0.54 | 65.53                                                         | 1.38              | 1.35               | 1.09  | 1.66 |
| 5th                                                                              | 75.66 | 70.17 | 92.30 | 11.67                                     | 0.70 | 53.75                                                         | 1.13              | 1.06               | 0.81  | 1.40 |

\*PR=Prevalence ratios estimated using Poisson regression.

<sup>†</sup>PRadj=Prevalence ratios adjusted for sex, age, race/ethnicity (White, Mixed ethnic group, Black or Black British, Asian or Asian British and Other race), region, survey year, and household income.

<sup>‡</sup>Significant linear trend across all quintiles ( $p \leq 0.001$ ).

In our counterfactual scenarios, we calculated the percentage of excessive free sugar intake avoided if the consumption of ultra-processed foods and table sugar were zero (**Figure 1**). We estimated that about 47% of excessive free sugars intake in the UK population could be potentially avoided if the consumption of ultra-processed foods was eliminated. Eliminating table sugar could potentially avoid 9.4% of the excessive free sugars intake. This greater reduction in the percentage of excessive free sugar intake due to elimination of ultra-processed foods, relative to table sugar, was observed in all age groups, except in the elderly group where both scenarios had similar impacts on total free sugar intake.

## DISCUSSION

In this large, nationally representative sample of the UK population, higher consumption of ultra-processed food was associated with greater dietary content of free sugars in children, adolescents, and adults. Using theoretical minimum risk exposure level scenarios, we also showed that by eliminating ultra-processed food consumption, the prevalence of excessive free sugar intake (10% or more of total energy intake) could be potentially reduced from 60% to 28%. Greater reduction could be achieved in children (from 74% to 28%) and adolescents (from 83% to 29%).

Our findings confirm an excessive consumption of free sugars in the UK diet [13] and show that ultra-processed foods contributed nearly 65% of all free sugars in all age groups and nearly 80% in children and adolescents. Unprocessed or minimally processed foods (mostly fresh juice) and processed culinary ingredients (mostly table sugar) contributed between 19% and 27% of the dietary content of free sugars, while processed foods provided the lowest contribution in all age groups.

Our findings are similar to previous studies conducted in high- and middle-income countries that have shown strong associations between the intake of ultra-processed foods and the dietary content of free sugars [8-11]. A previous study conducted in Chile similarly showed that the association between ultra-processed food consumption and the dietary content of added sugars is more pronounced among children and adolescents [12]. In our study there was no association between ultra-processed food consumption and dietary content of free sugars among the elderly, probably due to differences in the type of ultra-processed foods consumed in this age group, with salted products more likely to be consumed than the sweetened products.

There is strong evidence that the high consumption of free sugars contributes to excess obesity, type 2 diabetes, dyslipidaemia, hypertension and coronary heart disease [2-4]. Consequently, most dietary recommendations now advise limiting free sugar intake, but more focused efforts are needed to put this recommendation into practice. Changing personal behaviour and choice alone is not an effective or realistic option as our findings confirm that the majority of free sugar is added to food before it is marketed and sold. Voluntary agreements between industry and government have been shown

1  
2  
3 repeatedly to be ineffective in improving public health [24]. This is confirmed by recent  
4 UK experience where the early stages of the government's sugar reduction programme,  
5 which challenged the food industry to voluntarily cut sugar in some products, has  
6 produced only slow progress toward proposed targets [25]. Thus, more drastic measures  
7 that change the availability, price and marketing of these products is necessary.  
8  
9  
10  
11

12  
13 The analyses presented here suggest that actions to reduce the consumption of  
14 ultra-processed foods generally rich in free sugars could lead to larger public health  
15 benefits. Policies concerning the use of fiscal measures to reduce intake of free sugars  
16 and improve diet quality should consider extending beyond artificially sweetened  
17 beverages to include the main driver of excessive free sugar intake, including dairy  
18 drinks, cakes, biscuits and confectionery [13].  
19  
20  
21  
22  
23

24 To our knowledge, this is the first study to examine the association between  
25 consumption of ultra-processed foods, as defined per NOVA [6], and dietary content of  
26 free sugar in different age groups of the UK population. The use of NOVA is a key  
27 strength of the study as it classified foods by their level of processing level using  
28 standardised and objective criteria. NOVA has been recognised as a valid tool for public  
29 health and nutrition research and policy by the Food and Agricultural Organization of  
30 the United Nations [26] and the Pan American Health Organization [27]. In addition, we  
31 used data from the NDNS - a large and nationally representative sample of the UK  
32 population, applying weighting to reduce any sampling and non-response bias. Unlike  
33 household budget data, food diaries employed in the NDNS take food wastage into  
34 account, include food eaten out of home, and do not assume that all individuals within  
35 a household consume the same diet. Importantly, the dietary data also allowed for the  
36 disaggregation of dishes into their constituents and classification of the underlying  
37 ingredients, which enabled the calculation of more precise estimates of intakes of each  
38 NOVA group and reduced misclassification.  
39  
40  
41  
42  
43  
44  
45  
46  
47  
48  
49  
50  
51

52 Potential limitations should be considered. The dietary data we used were self-  
53 reported and may be subject to misclassification. A constant limitation of dietary  
54 assessment methods is underreporting of some foods (particularly unhealthy foods),  
55 though food diaries are recognised to be one of the most comprehensive methods for  
56 assessing dietary intake. Possible underreporting of unhealthy foods may lead to an  
57  
58  
59  
60

1  
2  
3 underestimation of the dietary contribution of ultra-processed foods and the overall  
4 intake of free sugars, but may less likely affect the association between these variables.  
5  
6 Nevertheless, accurate and valid NDNS data were achieved through optimal methods  
7 for collecting dietary intake [28] which helped to minimise missing information. NDNS  
8 collects limited information indicative of food processing (for example, place of meals  
9 and product brands), which may lead to misclassification of food items. This bias is more  
10 likely for a small number of specific food items such as pizza where there is insufficient  
11 information for classification purposes (see **Suppl. Table S2**). In those cases, the most  
12 frequently consumed alternative (culinary preparation or manufactured product) was  
13 chosen. Finally, our theoretical minimum risk exposure models estimate the potential  
14 impact of eliminating each of the main sources of free sugars on excessive free sugar  
15 intake, ignoring substitutions that may occur in the consumption of other foods.  
16 Although our findings suggest that greater reduction in excessive free sugar intake could  
17 be achieved by eliminating ultra-processed food consumption, guidance to the public  
18 about reducing the consumption of table sugar remains an important component of any  
19 public health guidance.  
20  
21  
22  
23  
24  
25  
26  
27  
28  
29  
30  
31  
32  
33  
34

## 35 **Conclusions**

36  
37 Almost half of excessive intake of free sugars in the UK can be attributed to ultra-  
38 processed foods. Policies to reduce sugar consumption should focus on minimizing  
39 consumption of ultra-processed foods and replacing them with unprocessed or  
40 minimally processed foods alternatives. The study adds to a growing body of evidence  
41 that ultra-processed foods are a major contributor to growth of diet related non-  
42 communicable diseases globally.  
43  
44  
45  
46  
47  
48  
49  
50

51 **Author contributions:** CAM, EMS, FR, MLdCL, and RBL designed the research. FR and  
52 RBL undertook data management and analysis. CAM, CM, EMS, FR, LFMR, MLdCL, and  
53 RBL interpreted the data. FR wrote the first draft of the manuscript. All authors read,  
54 edited and approved the final manuscript.  
55  
56  
57  
58  
59  
60

1  
2  
3 **Funding:** This work was supported by the Fundação de Amparo à Pesquisa do Estado de  
4 São Paulo (FAPESP), grant numbers 2015/14900-9, 2016/14302-7 (FR is a beneficiary of  
5 a postdoctoral fellowship), and 2014/25614-4 (LFMR is a beneficiary of a doctoral  
6 fellowship). FAPESP had no role in the design, analysis or writing of this manuscript.  
7  
8  
9

10  
11 **Competing interests:** None declared.  
12

13 **Data sharing statement:** This study is based on open data of the UK population that is  
14 available in the UK Data Archive website (<http://www.esds.ac.uk>).  
15  
16  
17  
18  
19  
20  
21  
22  
23  
24  
25  
26  
27  
28  
29  
30  
31  
32  
33  
34  
35  
36  
37  
38  
39  
40  
41  
42  
43  
44  
45  
46  
47  
48  
49  
50  
51  
52  
53  
54  
55  
56  
57  
58  
59  
60

For peer review only



**REFERENCES**

1. Scientific Advisory Committee on Nutrition. SACN's Sugars and Health Recommendations: Why 5%. London, UK: Scientific Advisory Committee on Nutrition, Department of Health, 2015.
2. Te Morenga LA, Howatson AJ, Jones RM, Mann J. Dietary sugars and cardiometabolic risk: systematic review and meta-analyses of randomized controlled trials of the effects on blood pressure and lipids. *Am J Clin Nutr* 2014;100(1):65-79.
3. Scientific Advisory Committee on Nutrition. Carbohydrates and Health Report. London, UK: Scientific Advisory Committee on Nutrition, Department of Health, 2015.
4. Te Morenga L, Mallard S, Mann J. Dietary sugars and body weight: systematic review and meta-analyses of randomised controlled trials and cohort studies. *BMJ* 2013;346:e7492.
5. World Health Organization. Sugars intake for adults and children. Geneva, Switzerland: World Health Organization, 2015.
6. Monteiro CA, Cannon G, Moubarac JC, Levy RB, Louzada ML, Jaime PC. The UN decade of nutrition, the NOVA food classification and the trouble with ultra-processing. *Public Health Nutr* 2018;21:5-17.
7. Martinez Steele E, Popkin BM, Swinburn B, Monteiro CA. The share of ultra-processed foods and the overall nutritional quality of diets in the US: evidence from a nationally representative cross-sectional study. *Popul Health Metr* 2017;15:6.
8. Moubarac JC, Batal M, Louzada ML, Martinez Steele E, Monteiro CA. Consumption of ultra-processed foods predicts diet quality in Canada. *Appetite* 2017;108:512-520.
9. Rauber F, da Costa Louzada ML, Steele EM, Millett C, Monteiro CA, Levy RB. Ultra-Processed Food Consumption and Chronic Non-Communicable Diseases-

- 1  
2  
3 Related Dietary Nutrient Profile in the UK (2008-2014). *Nutrients*. 2018;10(5)  
4 9;10(5), pii: E587.  
5  
6  
7 10. Martinez Steele E, Baraldi LG, Louzada ML, Moubarac JC, Mozaffarian D,  
8 Monteiro CA. Ultra-processed foods and added sugars in the US diet: evidence  
9 from a nationally representative cross-sectional study. *BMJ Open*  
10 2016;6(3):e009892.  
11  
12  
13 11. Louzada M, Ricardo CZ, Steele EM, Levy RB, Cannon G, Monteiro CA. The share  
14 of ultra-processed foods determines the overall nutritional quality of diets in  
15 Brazil. *Public Health Nutr* 2018;21(1):94-102.  
16  
17  
18 12. Cediel G, Reyes M, da Costa Louzada ML, Martinez Steele E, Monteiro CA,  
19 Corvalán C, Uauy R. Ultra-processed foods and added sugars in the Chilean diet  
20 (2010). *Public Health Nutr* 2018;21(1):125-133.  
21  
22  
23 13. Public Health England. National Diet and Nutrition Survey Results from years 7  
24 and 8 (Combined) of the Rolling Programme (2014/2015 to 2015/2016). London,  
25 UK: Public Health England, 2018.  
26  
27  
28 14. Department of Health and Social Care: Global Public Health Directorate: Obesity,  
29 Food and Nutrition. Childhood obesity: a plan for action, Chapter 2. London, UK:  
30 Department of Health and Social Care, 2018.  
31  
32  
33 15. Public Health England. National Diet and Nutrition Survey Results from Years 1,  
34 2, 3 and 4 (Combined) of the Rolling Programme (2008/2009–2011/2012).  
35 London, UK: Public Health England, 2014.  
36  
37  
38 16. Fitt E, Cole D, Ziauddeen N, Pell D, Stickley E, Harvey A, Stephen AM. DINO (Diet  
39 In Nutrients Out) - an integrated dietary assessment system. *Public Health Nutr*  
40 2015;18(2):234-241.  
41  
42  
43 17. Public Health England. McCance and Widdowson's the composition of foods  
44 integrated dataset 2015. London, UK: Public Health England, 2015.  
45  
46  
47 18. Monteiro CA, Cannon G, Levy RB, Moubarac JC, Jaime PC, Martins AP, Canella D,  
48 Louzada MLDC, Parra D. NOVA. The star shines bright. *World Nutrition* 2016;7(1-  
49 3):28-38.  
50  
51  
52  
53  
54  
55  
56  
57  
58  
59  
60

- 1  
2  
3 19. Fitt E, Mak TN, Stephen AM, Prynne C, Roberts C, Swan G, Farron-Wilson M.  
4 Disaggregating composite food codes in the UK National Diet and Nutrition  
5 Survey food composition databank. *Eur J Clin Nutr* 2010;64 Suppl 3:S32-36.  
6  
7
- 8  
9 20. White IR, Royston P, Wood AM. Multiple imputation using chained equations:  
10 Issues and guidance for practice. *Stat Med* 2011;30(4):377-399.  
11  
12
- 13 21. Nielsen SJ, Adair L. An alternative to dietary data exclusions. *J Am Diet Assoc*  
14 2007;107(5):792-799.  
15  
16
- 17 22. Steenland K, Armstrong B. An overview of methods for calculating the burden of  
18 disease due to specific risk factors. *Epidemiology*. 2006 Sep;17(5):512-9.  
19  
20
- 21 23. Rezende LFM, Eluf-Neto J. Population attributable fraction: planning of diseases  
22 prevention actions in Brazil. *Rev Saúde Pública* 2016;50:30.  
23  
24
- 25 24. Moodie R, Stuckler D, Monteiro CA, Sheron N, Neal B, Thamarangsi T, Lincoln P,  
26 Casswell S. Profits and pandemics: prevention of harmful effects of tobacco,  
27 alcohol, and ultra-processed food and drink industries. *Lancet*  
28 2013;381(9867):670-679.  
29  
30  
31
- 32 25. Public Health England. First measure of industry progress to cut sugar unveiled  
33 [press release]. London, UK: Public Health England, 2018.  
34  
35  
36
- 37 26. Food and Agriculture Organization of the United Nations. Guidelines on the  
38 collection of information on food processing through food consumption surveys.  
39 Rome, Italy: Food and Agriculture Organization of the United Nations, 2015.  
40  
41  
42
- 43 27. Pan American Health Organization. Ultra-processed Food and Drink Products in  
44 Latin America: Trends, Impact on Obesity, Policy Implications. Washington, DC:  
45 Pan American Health Organization, 2015.  
46  
47  
48
- 49 28. Public Health England. Dietary data collection and editing. In *National Diet and*  
50 *Nutrition Survey. Results from years 1–4 (combined) of the Rolling Programme*  
51 *(2008/2009–2011/2012)*. London, UK: Public Health England, 2014. Available  
52 online:  
53 [https://www.gov.uk/government/statistics/national-diet-](https://www.gov.uk/government/statistics/national-diet-and-nutrition-survey-results-from-years-1-to-4-combined-of-the-rolling-)  
54 [and-nutrition-survey-results-from-years-1-to-4-combined-of-the-rolling-](https://www.gov.uk/government/statistics/national-diet-and-nutrition-survey-results-from-years-1-to-4-combined-of-the-rolling-)  
55  
56  
57  
58  
59  
60

1  
2  
3 programme-for-2008-and-2009-to-2011-and-2012 (accessed on 15 January  
4  
5 2018).  
6  
7  
8  
9  
10  
11  
12  
13  
14  
15  
16  
17  
18  
19  
20  
21  
22  
23  
24  
25  
26  
27  
28  
29  
30  
31  
32  
33  
34  
35  
36  
37  
38  
39  
40  
41  
42  
43  
44  
45  
46  
47  
48  
49  
50  
51  
52  
53  
54  
55  
56  
57  
58  
59  
60

For peer review only

1  
2  
3 **Figure 1.** Percentage of excessive free sugar intake that would be avoided under two  
4 counterfactual scenarios regarding the consumption of the main dietary sources of free  
5 sugar. UK population aged 1.5 years or over (2008–14).  
6  
7  
8  
9  
10  
11  
12  
13  
14  
15  
16  
17  
18  
19  
20  
21  
22  
23  
24  
25  
26  
27  
28  
29  
30  
31  
32  
33  
34  
35  
36  
37  
38  
39  
40  
41  
42  
43  
44  
45  
46  
47  
48  
49  
50  
51  
52  
53  
54  
55  
56  
57  
58  
59  
60

For peer review only

Figure 1.

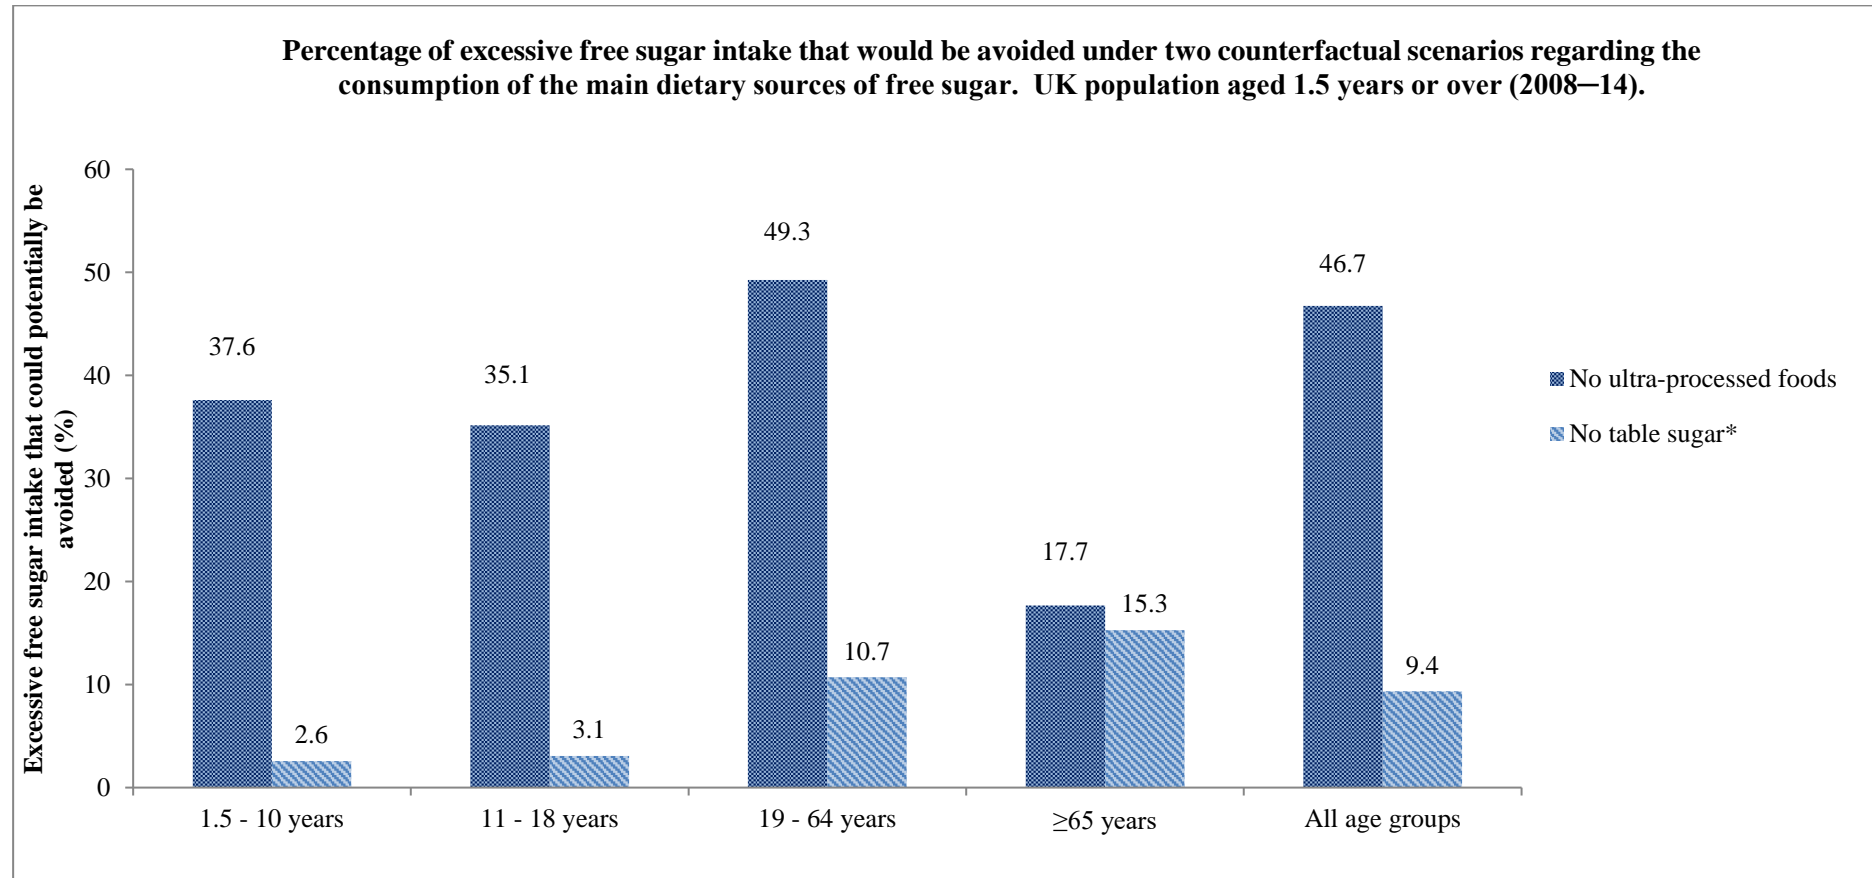

\*Including honey, molasses, maple syrup (100%).

1  
2  
3  
4 **Ultra-processed foods and excessive free sugar intake in the United Kingdom: a**  
5 **nationally representative cross-sectional study.**  
6  
7  
8

9 Fernanda Rauber <sup>1,2</sup>, Maria Laura da Costa Louzada <sup>1,3</sup>, Eurídice Martínez Steele <sup>1,2</sup>, Leandro  
10 Fórnias Machado de Rezende <sup>1,4</sup>, Christopher Millett <sup>1,5</sup>, Carlos Augusto Monteiro <sup>1,2</sup>, Renata  
11 Bertazzi Levy <sup>1,4</sup>  
12  
13  
14  
15

16 <sup>1</sup> Núcleo de Pesquisas Epidemiológicas em Nutrição e Saúde, Universidade de São Paulo, São  
17 Paulo, Brasil.

18 <sup>2</sup> Departamento de Nutrição, Faculdade de Saúde Pública, Universidade de São Paulo, São  
19 Paulo, Brasil.

20 <sup>3</sup> Departamento de Políticas Públicas e Saúde Coletiva, Universidade Federal de São Paulo,  
21 São Paulo, Brasil.

22 <sup>4</sup> Departamento de Medicina Preventiva, Faculdade de Medicina FMUSP, Universidade de  
23 São Paulo, São Paulo, Brasil.

24 <sup>5</sup> Public Health Policy Evaluation Unit, School of Public Health, Imperial College London,  
25 London W6 8RP, United Kingdom.  
26  
27  
28  
29  
30  
31  
32  
33  
34  
35  
36

37 **Corresponding author:** Fernanda Rauber, [rauber.fernanda@gmail.com](mailto:rauber.fernanda@gmail.com), Departamento de  
38 Nutrição, Faculdade de Saúde Pública, Universidade de São Paulo, Av. Dr. Arnaldo, 715, São  
39 Paulo 01246-904, Brasil.  
40  
41  
42  
43  
44  
45  
46  
47  
48  
49  
50  
51  
52  
53  
54  
55  
56  
57  
58  
59  
60

**Supplementary table S1. The Nova food classification system\***

| Food groups                                                                                                                                                                                                                                                                                                                                                                                                                                                                                                                                                                                                                                                                                                  | Examples                                                                                                                                                                                                                                                                                                                                                                                                                                                                                                                                                                                                                             |
|--------------------------------------------------------------------------------------------------------------------------------------------------------------------------------------------------------------------------------------------------------------------------------------------------------------------------------------------------------------------------------------------------------------------------------------------------------------------------------------------------------------------------------------------------------------------------------------------------------------------------------------------------------------------------------------------------------------|--------------------------------------------------------------------------------------------------------------------------------------------------------------------------------------------------------------------------------------------------------------------------------------------------------------------------------------------------------------------------------------------------------------------------------------------------------------------------------------------------------------------------------------------------------------------------------------------------------------------------------------|
| <p><b>1) Unprocessed foods or minimally processed foods</b></p> <p>Natural foods altered by methods such as freezing, pasteurization, fermentation, removal of inedible or unwanted parts, grinding, and other methods that do not include the addition of substances such as salt, sugar and/or oils or fats.</p>                                                                                                                                                                                                                                                                                                                                                                                           | <p>Fresh, dry or frozen fruits or vegetables; legumes; grains, roots and tubers, flours and pasta; pasteurized or power plain milk and plain yogurt; fresh or frozen meat (fish, poultry and red meat); eggs; nuts and seeds; fungi; fresh or pasteurised fruit or vegetable juices without added sugar, sweeteners or flavours; tea, coffee and drinking water.</p>                                                                                                                                                                                                                                                                 |
| <p><b>2) Processed culinary ingredients</b></p> <p>Substances obtained directly from group 1 foods or from nature by processes that include pressing, refining, grinding, milling, and drying, and consumed in combination with group 1 foods in freshly prepared dishes or drinks.</p>                                                                                                                                                                                                                                                                                                                                                                                                                      | <p>Salt; sugar, honey and molasses; vegetable oils; butter and lard; starches extracted from corn and other plants.</p>                                                                                                                                                                                                                                                                                                                                                                                                                                                                                                              |
| <p><b>3) Processed foods</b></p> <p>Products manufactured with the addition of group 2 substances (e.g. salt, sugar, oil, and fats) to group 1 foods and alcoholic drinks produced by fermentation of group 1 foods such as beer, cider and wine.</p>                                                                                                                                                                                                                                                                                                                                                                                                                                                        | <p>Canned or bottled vegetables, fruits and legumes; salted or sugared nuts and seeds; salted, cured, or smoked meats; canned fish; fruits in syrup; cheeses and unpackaged freshly made breads.</p>                                                                                                                                                                                                                                                                                                                                                                                                                                 |
| <p><b>4) Ultra-processed foods</b></p> <p>Food and drink formulations made from several ingredients. Such ingredients include salt, sugar, oils, and fats but also other substances derived from foods but not commonly used as culinary ingredients (such as protein isolates, hydrogenated oils, modified starches) and additives used to imitate sensory quality of natural foods and freshly prepared dishes or to disguise unpalatable aspects of the final product (such as flavours, colours, sweeteners, emulsifiers). Alcoholic drinks produced by fermentation of group 1 foods followed by distillation of the resulting alcohol, such as whisky, gin, rum, vodka, are classified in group 4.</p> | <p>Carbonated drinks; sweet or savoury packaged snacks; confectionery; mass-produced packaged breads and buns; margarines and spreads; biscuits, pastries, cakes, and cake mixes; breakfast 'cereals', 'cereal' and 'energy' bars; 'energy' drinks; milk drinks, 'fruit' yoghurts and 'fruit' drinks; cocoa drinks; meat and chicken extracts and 'instant' sauces; ready to heat products including pre-prepared pies and pasta and pizza dishes; poultry and fish 'nuggets' and 'sticks', sausages, burgers, hot dogs, and other reconstituted meat products, and powdered and packaged 'instant' soups, noodles and desserts.</p> |

Adapted from Monteiro et al. (2016 and 2018).

Monteiro CA, Cannon G, Moubarac JC et al. (2018) The UN Decade of Nutrition, the NOVA food classification and the trouble with ultra-processing. *Public Health Nutr* 21, 5-17.

Monteiro CA, Cannon G, Levy RB, et al. NOVA. The star shines bright. *World Nutrition*. 2016;7(1-3):28-38.



Supplementary Table S2. Coding of subsidiary food groups from National Diet and Nutrition Survey according to NOVA classification.

| Subsidiary food group code | Subsidiary food group name                               | NOVA food group† |
|----------------------------|----------------------------------------------------------|------------------|
| 1C                         | Pizza                                                    | 4                |
| 1D                         | Pasta (manufactured products and ready meals)            | 4                |
| 1E                         | Pasta (other, including homemade dishes)                 | *                |
| 1F                         | Rice (manufactured products and ready meals)             | 4                |
| 1G                         | Rice (other, including homemade dishes)                  | *                |
| 1R                         | Other cereals                                            | *                |
| 2R                         | White bread (not high fibre, not multiseed bread)        | 4                |
| 3R                         | Wholemeal bread                                          | 4                |
| 4R                         | Other bread                                              | 4                |
| 5R                         | High fibre breakfast cereals                             | 4                |
| 6R                         | Other breakfast cereals (not high fibre)                 | 4                |
| 7A                         | Biscuits(manufactured/retail)                            | 4                |
| 7B                         | Biscuits (homemade)                                      | *                |
| 8B                         | Fruit pies (manufactured)                                | 4                |
| 8C                         | Fruit pies (homemade)                                    | *                |
| 8D                         | Buns cakes and pastries (manufactured)                   | 4                |
| 8E                         | Buns cakes and pastries (homemade)                       | *                |
| 9C                         | Cereal based milk puddings (manufactured)                | 4                |
| 9D                         | Cereal based milk puddings (homemade)                    | *                |
| 9E                         | Sponge puddings (manufactured)                           | 4                |
| 9F                         | Sponge puddings (homemade)                               | *                |
| 9G                         | Other cereal based puddings (manufactured)               | 4                |
| 9H                         | Other cereal based puddings (homemade)                   | *                |
| 10R                        | Whole milk                                               | 1                |
| 11R                        | Semi-skimmed milk                                        | 1                |
| 12R                        | Skimmed milk                                             | 1                |
| 13A                        | Infant formula                                           | 4                |
| 13B                        | Cream (including imitation cream)                        | *                |
| 13R                        | Other milk                                               | *                |
| 14A                        | Cottage cheese                                           | 3                |
| 14B                        | Cheddar cheese                                           | 3                |
| 14R                        | Other cheese                                             | *                |
| 15B                        | Yogurt                                                   | *                |
| 15C                        | Fromage frais and other dairy desserts (manufactured)    | 4                |
| 15D                        | Dairy desserts (homemade)                                | *                |
| 16C                        | Manufactured egg products, including ready meals         | 4                |
| 16D                        | Other eggs and egg dishes, including homemade            | *                |
| 17R                        | Butter                                                   | 2                |
| 18A                        | Polyunsaturated margarine                                | 4                |
| 18B                        | Polyunsaturated oils                                     | 2                |
| 19A                        | Polyunsaturated low fat spread                           | 4                |
| 19R                        | Low fat spread not polyunsaturated                       | 4                |
| 20A                        | Block margarine                                          | 4                |
| 20B                        | Soft margarine not polyunsaturated                       | 4                |
| 20C                        | Other cooking fats and oils not polyunsaturated          | 2                |
| 21A                        | Reduced fat spread (polyunsaturated)                     | 4                |
| 21B                        | Reduced fat spread (not polyunsaturated)                 | 4                |
| 22A                        | Ready meals/meal centres based on bacon and ham          | 4                |
| 22B                        | Other bacon and ham (including homemade dishes)          | *                |
| 23A                        | Manufactured beef products (including ready meals)       | 4                |
| 23B                        | Other beef & veal (including homemade recipe dishes)     | *                |
| 24A                        | Manufactured lamb products (including ready meals)       | 4                |
| 24B                        | Other lamb (including homemade recipe dishes)            | *                |
| 25A                        | Manufactured pork products(including ready meals)        | 4                |
| 25B                        | Other pork (including homemade recipe dishes)            | *                |
| 26A                        | Manufactured coated chicken/turkey products              | 4                |
| 27A                        | Manufactured chicken products (including ready meals)    | 4                |
| 27B                        | Other chicken/turkey (including homemade recipe dishes)  | *                |
| 28R                        | Liver and dishes                                         | *                |
| 29R                        | Burgers and kebabs purchased                             | 4                |
| 30A                        | Ready meals based on sausages                            | 4                |
| 30B                        | Other sausages (including homemade dishes)               | *                |
| 31A                        | Meat pies and pastries (manufactured)                    | 4                |
| 31B                        | Meat pies and pastries (homemade)                        | *                |
| 32A                        | Other meat products (manufactured including ready meals) | 4                |
| 32B                        | Other meat (including homemade recipe dishes)            | *                |

1  
2  
3  
4  
5  
6  
7  
8  
9  
10  
11  
12  
13  
14  
15  
16  
17  
18  
19  
20  
21  
22  
23  
24  
25  
26  
27  
28  
29  
30  
31  
32  
33  
34  
35  
36  
37  
38  
39  
40  
41  
42  
43  
44  
45  
46  
47  
48  
49  
50  
51  
52  
53  
54  
55  
56  
57  
58  
59  
60

|     |                                                               |    |
|-----|---------------------------------------------------------------|----|
| 33R | White fish coated or fried                                    | *  |
| 34C | Manufactured white fish products (including ready meals)      | 4  |
| 34D | Other white fish (including homemade dishes)                  | *  |
| 34E | Manufactured shellfish products (including ready meals)       | 4  |
| 34F | Other shellfish (including homemade dishes)                   | *  |
| 34G | Manufactured canned tuna products (including ready meals)     | *  |
| 34H | Other canned tuna (including homemade dishes)                 | *  |
| 35A | Manufactured oily fish products (including ready meals)       | 4  |
| 35B | Other oily fish (including homemade dishes)                   | *  |
| 36A | Carrots (raw)                                                 | 1  |
| 36B | Salad and other raw vegetables                                | *  |
| 36C | Tomatoes raw                                                  | 1  |
| 37A | Peas not raw                                                  | *  |
| 37B | Green beans not raw                                           | *  |
| 37C | Baked beans                                                   | 4  |
| 37D | Leafy green vegetables not raw                                | *  |
| 37E | Carrots not raw                                               | *  |
| 37F | Tomatoes not raw                                              | *  |
| 37I | Beans and pulses (including ready meal & homemade dishes)     | *  |
| 37K | Meat alternatives (including ready meals and homemade dishes) | 4  |
| 37L | Other manufactured vegetable products (including ready meals) | 4  |
| 37M | Other vegetables (including homemade dishes)                  | *  |
| 38A | Chips purchased including takeaway                            | 4  |
| 38C | Other manufactured potato products fried/baked                | 4  |
| 38D | Other fried/roast potatoes (including homemade dishes)        | *  |
| 39A | Other potato products and dishes(manufactured)                | 4  |
| 39B | Other potatoes (including homemade dishes)                    | *  |
| 40A | Apples and pears not canned                                   | *  |
| 40B | Citrus fruit not canned                                       | *  |
| 40C | Bananas                                                       | *  |
| 40D | Canned fruit in juice                                         | *  |
| 40E | Canned fruit in syrup                                         | 3  |
| 40R | Other fruit not canned                                        | *  |
| 41A | Sugar                                                         | *  |
| 41B | Preserves                                                     | 3  |
| 41R | Sweet spreads fillings and icing                              | 4  |
| 42R | Crisps and savoury snacks                                     | 4  |
| 43R | Sugar confectionery                                           | 4  |
| 44R | Chocolate confectionery                                       | 4  |
| 45R | Fruit juice                                                   | *  |
| 47A | Liqueurs                                                      | 4  |
| 47B | Spirits                                                       | 4  |
| 48A | Wine                                                          | 3  |
| 48B | Fortified wine                                                | 4  |
| 48C | Low alcohol and alcohol free wine                             | 3  |
| 49A | Beers and lagers                                              | 3  |
| 49B | Low alcohol & alcohol free beer & lager                       | 3  |
| 49C | Cider and Perry                                               | 4  |
| 49D | Low alcohol & alcohol free cider & Perry                      | 4  |
| 49E | Alcoholic soft drinks (Alcopops)                              | 4  |
| 50A | Beverages dry weight                                          | 4  |
| 50C | Soup (manufactured/retail)                                    | 4  |
| 50D | Soup (homemade)                                               | *  |
| 50E | Nutrition powders and drinks                                  | 4  |
| 50R | Savoury sauces pickles gravies & condiments                   | 4  |
| 51A | Coffee (made up weight)                                       | *  |
| 51B | Tea (made up)                                                 | *  |
| 51C | Herbal tea (made up)                                          | 1  |
| 51D | Bottled water still or carbonated                             | *  |
| 51R | Tap water only                                                | 1  |
| 52A | Commercial toddlers drinks                                    | 3  |
| 52R | Commercial toddlers foods                                     | 3  |
| 53R | Ice cream                                                     | 4  |
| 54A | Cod liver oil and other fish oils                             | ** |
| 54B | Evening primrose oil and other plant oils                     | ** |
| 54C | Single vitamins/minerals not Folic acid, iron, calcium        | ** |
| 54D | Folic acid                                                    | ** |
| 54E | Iron only or with vitamin C                                   | ** |
| 54F | Calcium only or with vitamin D                                | ** |
| 54G | Vitamins (two or more including multivitamins) no minerals    | ** |
| 54H | Minerals (two or more including multimineral) no vitamins     | ** |
| 54I | Vitamins and minerals (including multivitamins & minerals)    | ** |
| 54J | Non-nutrient supplements (including herbal)                   | ** |

|     |                                                                     |    |
|-----|---------------------------------------------------------------------|----|
| 54K | Other nutrient supplements                                          | ** |
| 54L | Vitamin C                                                           | ** |
| 54M | Single vitamins/minerals not Folic acid, iron, calcium or vitamin C | ** |
| 54N | Cod liver oil and other fish oils (including with vitamins A, D, E) | ** |
| 54P | Multivitamins and/or minerals with omega ultra-processed            | ** |
| 55R | Artificial sweeteners                                               | 4  |
| 56R | Nuts and seeds                                                      | *  |
| 57A | Soft drinks not low calorie concentrated                            | 4  |
| 57B | Soft drinks not low calorie carbonated                              | 4  |
| 57C | Soft drinks not low calorie, ready to drink, still                  | 4  |
| 58A | Soft drinks low calorie concentrated                                | 4  |
| 58B | Soft drinks low calorie carbonated                                  | 4  |
| 58C | Soft drinks low calorie, ready to drink, still                      | 4  |
| 59R | Brown, granary and wheat germ bread                                 | 4  |
| 60R | 1% Milk                                                             | 1  |
| 61R | Smoothies                                                           | 1  |

† NOVA food groups defined as 1) unprocessed or minimally processed foods; 2) processed culinary ingredients; 3) processed foods; and 4) ultra-processed foods.

\* All foods within this subsidiary food group were individually coded (by food name).

\*\* Supplements were not included in any of the NOVA food groups.

Source: Rauber F, Louzada MLC, Steele EM, Millett C, Monteiro CA, Levy RB. Ultra-Processed Food Consumption and Chronic Non-Communicable Diseases-Related Dietary Nutrient Profile in the UK (2008–2014). *Nutrients* 2018, 10, 587; doi:10.3390/nu10050587.

**Supplementary table S3. Dietary content in free sugars according to age groups. UK population aged 1.5 years or over (2008–14).**

| Age groups            | % of total energy intake from free sugars |             | Individuals with $\geq 5\%$ of total energy intake from free sugars |              |              |
|-----------------------|-------------------------------------------|-------------|---------------------------------------------------------------------|--------------|--------------|
|                       | mean                                      | SE          | %                                                                   | 95%CI        |              |
| 1.5 - 10 years        | 14.00                                     | 0.14        | 97.16                                                               | 96.29        | 97.84        |
| 11 - 18 years         | 15.78                                     | 0.19        | 96.77                                                               | 95.62        | 97.62        |
| 19 - 64 years         | 11.93                                     | 0.14        | 88.82                                                               | 87.48        | 90.04        |
| $\geq 65$ years       | 11.36                                     | 0.23        | 87.62                                                               | 84.88        | 89.93        |
| <b>All age groups</b> | <b>12.44</b>                              | <b>0.10</b> | <b>90.34</b>                                                        | <b>89.39</b> | <b>91.21</b> |

Supplementary table S4. Indicators of the dietary content in free sugars according to quintiles of the dietary contribution of NOVA food groups in the UK population aged 1.5 years or over (2008-14).

| Dietary contribution (% of total energy intake)                                  |       |       |        | % of total energy intake from free sugars |      | Individuals with ≥5% of total energy intake from free sugars |                   |                    |       |      | Individuals with ≥10% of total energy intake from free sugars |                   |                    |       |      |  |
|----------------------------------------------------------------------------------|-------|-------|--------|-------------------------------------------|------|--------------------------------------------------------------|-------------------|--------------------|-------|------|---------------------------------------------------------------|-------------------|--------------------|-------|------|--|
| Quintile                                                                         | mean  | min   | max    | mean                                      | SE   | %                                                            | PR*               | PRadj <sup>†</sup> | 95%CI |      | %                                                             | PR*               | PRadj <sup>†</sup> | 95%CI |      |  |
| <b>Unprocessed or minimally processed foods + Processed culinary ingredients</b> |       |       |        |                                           |      |                                                              |                   |                    |       |      |                                                               |                   |                    |       |      |  |
| 1st                                                                              | 15.10 | 0.00  | 20.92  | 15.36                                     | 0.24 | 95.94                                                        | 1.00              | 1.00               | —     | —    | 77.42                                                         | 1.00              | 1.00               | —     | —    |  |
| 2nd                                                                              | 24.90 | 20.92 | 28.43  | 13.44                                     | 0.22 | 94.28                                                        | 0.98              | 0.99               | 0.97  | 1.01 | 68.55                                                         | 0.89              | 0.92               | 0.86  | 0.97 |  |
| 3rd                                                                              | 31.68 | 28.43 | 34.96  | 12.62                                     | 0.21 | 91.92                                                        | 0.96              | 0.97               | 0.95  | 1.00 | 65.09                                                         | 0.84              | 0.89               | 0.84  | 0.95 |  |
| 4th                                                                              | 39.08 | 34.97 | 43.88  | 11.46                                     | 0.21 | 89.70                                                        | 0.93              | 0.96               | 0.93  | 0.98 | 55.09                                                         | 0.71              | 0.77               | 0.72  | 0.83 |  |
| 5th                                                                              | 53.57 | 43.88 | 91.90  | 10.32 <sup>‡</sup>                        | 0.19 | 82.41                                                        | 0.86              | 0.89               | 0.86  | 0.92 | 46.36                                                         | 0.60 <sup>‡</sup> | 0.67 <sup>‡</sup>  | 0.61  | 0.73 |  |
| <b>Processed foods</b>                                                           |       |       |        |                                           |      |                                                              |                   |                    |       |      |                                                               |                   |                    |       |      |  |
| 1st                                                                              | 0.32  | 0.00  | 1.33   | 13.53                                     | 0.29 | 87.19                                                        | 1.00              | 1.00               | —     | —    | 64.14                                                         | 1.00              | 1.00               | —     | —    |  |
| 2nd                                                                              | 2.55  | 1.34  | 3.79   | 13.48                                     | 0.24 | 92.34                                                        | 1.06              | 1.06               | 1.03  | 1.10 | 67.93                                                         | 1.06              | 1.08               | 1.01  | 1.16 |  |
| 3rd                                                                              | 5.28  | 3.79  | 6.82   | 12.83                                     | 0.19 | 92.39                                                        | 1.06              | 1.07               | 1.03  | 1.10 | 67.10                                                         | 1.05              | 1.08               | 1.00  | 1.16 |  |
| 4th                                                                              | 9.28  | 6.82  | 12.03  | 11.89                                     | 0.20 | 90.61                                                        | 1.04              | 1.06               | 1.02  | 1.09 | 58.87                                                         | 0.92              | 0.98               | 0.91  | 1.06 |  |
| 5th                                                                              | 19.54 | 12.04 | 65.22  | 11.38 <sup>‡</sup>                        | 0.19 | 89.40                                                        | 1.03              | 1.04               | 1.01  | 1.08 | 53.70                                                         | 0.84 <sup>‡</sup> | 0.91 <sup>‡</sup>  | 0.84  | 0.98 |  |
| <b>Ultra-processed foods</b>                                                     |       |       |        |                                           |      |                                                              |                   |                    |       |      |                                                               |                   |                    |       |      |  |
| 1st                                                                              | 34.89 | 1.82  | 43.69  | 9.94                                      | 0.22 | 80.50                                                        | 1.00              | 1.00               | —     | —    | 41.87                                                         | 1.00              | 1.00               | —     | —    |  |
| 2nd                                                                              | 48.74 | 43.69 | 53.04  | 11.34                                     | 0.20 | 89.16                                                        | 1.11              | 1.10               | 1.05  | 1.15 | 56.35                                                         | 1.35              | 1.31               | 1.18  | 1.46 |  |
| 3rd                                                                              | 57.06 | 53.05 | 60.96  | 12.16                                     | 0.21 | 92.65                                                        | 1.15              | 1.14               | 1.09  | 1.18 | 60.76                                                         | 1.45              | 1.39               | 1.25  | 1.54 |  |
| 4th                                                                              | 65.37 | 60.96 | 70.14  | 13.38                                     | 0.21 | 94.08                                                        | 1.17              | 1.15               | 1.10  | 1.19 | 70.18                                                         | 1.68              | 1.55               | 1.41  | 1.72 |  |
| 5th                                                                              | 78.06 | 70.14 | 100.00 | 15.41 <sup>‡</sup>                        | 0.21 | 95.30                                                        | 1.18 <sup>‡</sup> | 1.15 <sup>‡</sup>  | 1.10  | 1.19 | 77.20                                                         | 1.84 <sup>‡</sup> | 1.64 <sup>‡</sup>  | 1.48  | 1.81 |  |

\*PR=Prevalence ratios estimated using Poisson regression.

<sup>†</sup>PRadj=Prevalence ratios adjusted for sex, age, race/ethnicity (White, Mixed ethnic group, Black or Black British, Asian or Asian British and Other race), region, survey year, and household income.

<sup>‡</sup>Significant linear trend across all quintiles (p≤0.001).

STROBE Statement—Checklist of items that should be included in reports of *cross-sectional studies*

|                              | Item No | Recommendation                                                                                                                                                                                               | Page No |
|------------------------------|---------|--------------------------------------------------------------------------------------------------------------------------------------------------------------------------------------------------------------|---------|
| <b>Title and abstract</b>    | 1       | (a) Indicate the study's design with a commonly used term in the title or the abstract                                                                                                                       | 1, 2    |
|                              |         | (b) Provide in the abstract an informative and balanced summary of what was done and what was found                                                                                                          | 1, 2    |
| <b>Introduction</b>          |         |                                                                                                                                                                                                              |         |
| Background/rationale         | 2       | Explain the scientific background and rationale for the investigation being reported                                                                                                                         | 4       |
| Objectives                   | 3       | State specific objectives, including any prespecified hypotheses                                                                                                                                             | 4, 5    |
| <b>Methods</b>               |         |                                                                                                                                                                                                              |         |
| Study design                 | 4       | Present key elements of study design early in the paper                                                                                                                                                      | 5       |
| Setting                      | 5       | Describe the setting, locations, and relevant dates, including periods of recruitment, exposure, follow-up, and data collection                                                                              | 5       |
| Participants                 | 6       | (a) Give the eligibility criteria, and the sources and methods of selection of participants                                                                                                                  | 5       |
| Variables                    | 7       | Clearly define all outcomes, exposures, predictors, potential confounders, and effect modifiers. Give diagnostic criteria, if applicable                                                                     | 6-9     |
| Data sources/<br>measurement | 8*      | For each variable of interest, give sources of data and details of methods of assessment (measurement). Describe comparability of assessment methods if there is more than one group                         | 6-9     |
| Bias                         | 9       | Describe any efforts to address potential sources of bias                                                                                                                                                    | 6,7,9   |
| Study size                   | 10      | Explain how the study size was arrived at                                                                                                                                                                    | 5       |
| Quantitative variables       | 11      | Explain how quantitative variables were handled in the analyses. If applicable, describe which groupings were chosen and why                                                                                 | 7,8     |
| Statistical methods          | 12      | (a) Describe all statistical methods, including those used to control for confounding                                                                                                                        | 8-9     |
|                              |         | (b) Describe any methods used to examine subgroups and interactions                                                                                                                                          | 8,9     |
|                              |         | (c) Explain how missing data were addressed                                                                                                                                                                  | 8       |
|                              |         | (d) If applicable, describe analytical methods taking account of sampling strategy                                                                                                                           | 9       |
|                              |         | (e) Describe any sensitivity analyses                                                                                                                                                                        | NA      |
| <b>Results</b>               |         |                                                                                                                                                                                                              |         |
| Participants                 | 13*     | (a) Report numbers of individuals at each stage of study—eg numbers potentially eligible, examined for eligibility, confirmed eligible, included in the study, completing follow-up, and analysed            | 8       |
|                              |         | (b) Give reasons for non-participation at each stage                                                                                                                                                         | NA      |
|                              |         | (c) Consider use of a flow diagram                                                                                                                                                                           | NA      |
| Descriptive data             | 14*     | (a) Give characteristics of study participants (eg demographic, clinical, social) and information on exposures and potential confounders                                                                     | NA      |
|                              |         | (b) Indicate number of participants with missing data for each variable of interest                                                                                                                          | 8       |
| Outcome data                 | 15*     | Report numbers of outcome events or summary measures                                                                                                                                                         | 10      |
| Main results                 | 16      | (a) Give unadjusted estimates and, if applicable, confounder-adjusted estimates and their precision (eg, 95% confidence interval). Make clear which confounders were adjusted for and why they were included | 12-16   |

|                          |    |                                                                                                                                                                            |       |
|--------------------------|----|----------------------------------------------------------------------------------------------------------------------------------------------------------------------------|-------|
|                          |    | (b) Report category boundaries when continuous variables were categorized                                                                                                  |       |
|                          |    | (c) If relevant, consider translating estimates of relative risk into absolute risk for a meaningful time period                                                           | NA    |
| Other analyses           | 17 | Report other analyses done—eg analyses of subgroups and interactions, and sensitivity analyses                                                                             | 12    |
| <b>Discussion</b>        |    |                                                                                                                                                                            |       |
| Key results              | 18 | Summarise key results with reference to study objectives                                                                                                                   | 17    |
| Limitations              | 19 | Discuss limitations of the study, taking into account sources of potential bias or imprecision. Discuss both direction and magnitude of any potential bias                 | 18,19 |
| Interpretation           | 20 | Give a cautious overall interpretation of results considering objectives, limitations, multiplicity of analyses, results from similar studies, and other relevant evidence | 19    |
| Generalisability         | 21 | Discuss the generalisability (external validity) of the study results                                                                                                      | 17,18 |
| <b>Other information</b> |    |                                                                                                                                                                            |       |
| Funding                  | 22 | Give the source of funding and the role of the funders for the present study and, if applicable, for the original study on which the present article is based              | 20    |

\*Give information separately for exposed and unexposed groups.

**Note:** An Explanation and Elaboration article discusses each checklist item and gives methodological background and published examples of transparent reporting. The STROBE checklist is best used in conjunction with this article (freely available on the Web sites of PLoS Medicine at <http://www.plosmedicine.org/>, Annals of Internal Medicine at <http://www.annals.org/>, and Epidemiology at <http://www.epidem.com/>). Information on the STROBE Initiative is available at [www.strobe-statement.org](http://www.strobe-statement.org).

# BMJ Open

## Ultra-processed foods and excessive free sugar intake in the United Kingdom: a nationally representative cross-sectional study

|                                 |                                                                                                                                                                                                                                                                                                                                                                                                                                                                                                                                                                                                                                                                                                                                                                                                                                                                                                                                                                                                                                                                                                                                                                                                                                                                                                  |
|---------------------------------|--------------------------------------------------------------------------------------------------------------------------------------------------------------------------------------------------------------------------------------------------------------------------------------------------------------------------------------------------------------------------------------------------------------------------------------------------------------------------------------------------------------------------------------------------------------------------------------------------------------------------------------------------------------------------------------------------------------------------------------------------------------------------------------------------------------------------------------------------------------------------------------------------------------------------------------------------------------------------------------------------------------------------------------------------------------------------------------------------------------------------------------------------------------------------------------------------------------------------------------------------------------------------------------------------|
| Journal:                        | <i>BMJ Open</i>                                                                                                                                                                                                                                                                                                                                                                                                                                                                                                                                                                                                                                                                                                                                                                                                                                                                                                                                                                                                                                                                                                                                                                                                                                                                                  |
| Manuscript ID                   | bmjopen-2018-027546.R2                                                                                                                                                                                                                                                                                                                                                                                                                                                                                                                                                                                                                                                                                                                                                                                                                                                                                                                                                                                                                                                                                                                                                                                                                                                                           |
| Article Type:                   | Original research                                                                                                                                                                                                                                                                                                                                                                                                                                                                                                                                                                                                                                                                                                                                                                                                                                                                                                                                                                                                                                                                                                                                                                                                                                                                                |
| Date Submitted by the Author:   | 31-May-2019                                                                                                                                                                                                                                                                                                                                                                                                                                                                                                                                                                                                                                                                                                                                                                                                                                                                                                                                                                                                                                                                                                                                                                                                                                                                                      |
| Complete List of Authors:       | Rauber, Fernanda; Universidade de Sao Paulo, Departamento de Nutrição; Universidade de Sao Paulo, Núcleo de Pesquisas Epidemiológicas em Nutrição e Saúde<br>Louzada, Maria Laura; Universidade Federal de Sao Paulo, Departamento de Políticas Públicas e Saúde Coletiva; Universidade de Sao Paulo, Núcleo de Pesquisas Epidemiológicas em Nutrição e Saúde<br>Martinez Steele, Euridice; Universidade de Sao Paulo, Departamento de Nutrição; Universidade de Sao Paulo, Núcleo de Pesquisas Epidemiológicas em Nutrição e Saúde<br>Rezende, Leandro; Universidade de Sao Paulo, Departamento de Medicina Preventiva, Faculdade de Medicina ; Universidade de Sao Paulo, Núcleo de Pesquisas Epidemiológicas em Nutrição e Saúde<br>Millett, Christopher; Imperial College London, Public Health Policy Evaluation Unit, School of Public Health; Universidade de Sao Paulo, Núcleo de Pesquisas Epidemiológicas em Nutrição e Saúde<br>Monteiro, Carlos; Universidade de Sao Paulo, Departamento de Nutrição; Universidade de Sao Paulo, Núcleo de Pesquisas Epidemiológicas em Nutrição e Saúde<br>Levy, Renata; Universidade de Sao Paulo, Departamento de Medicina Preventiva, Faculdade de Medicina ; Universidade de Sao Paulo, Núcleo de Pesquisas Epidemiológicas em Nutrição e Saúde |
| <b>Primary Subject Heading</b>: | Public health                                                                                                                                                                                                                                                                                                                                                                                                                                                                                                                                                                                                                                                                                                                                                                                                                                                                                                                                                                                                                                                                                                                                                                                                                                                                                    |
| Secondary Subject Heading:      | Epidemiology, Nutrition and metabolism                                                                                                                                                                                                                                                                                                                                                                                                                                                                                                                                                                                                                                                                                                                                                                                                                                                                                                                                                                                                                                                                                                                                                                                                                                                           |
| Keywords:                       | Food processing, Ultra-processed, Free sugar, United Kingdom                                                                                                                                                                                                                                                                                                                                                                                                                                                                                                                                                                                                                                                                                                                                                                                                                                                                                                                                                                                                                                                                                                                                                                                                                                     |
|                                 |                                                                                                                                                                                                                                                                                                                                                                                                                                                                                                                                                                                                                                                                                                                                                                                                                                                                                                                                                                                                                                                                                                                                                                                                                                                                                                  |

SCHOLARONE™  
Manuscripts



1  
2  
3 **Ultra-processed foods and excessive free sugar intake in the United Kingdom: a**  
4 **nationally representative cross-sectional study**  
5  
6

7 Fernanda Rauber <sup>1,2</sup>, Maria Laura da Costa Louzada <sup>1,3</sup>, Eurídice Martínez Steele <sup>1,2</sup>,  
8 Leandro Fórniás Machado de Rezende <sup>1,4</sup>, Christopher Millett <sup>1,5</sup>, Carlos Augusto  
9 Monteiro <sup>1,2</sup>, Renata Bertazzi Levy <sup>1,4</sup>  
10  
11  
12  
13

14  
15 <sup>1</sup> Núcleo de Pesquisas Epidemiológicas em Nutrição e Saúde, Universidade de São Paulo,  
16 São Paulo, Brasil.

17  
18 <sup>2</sup> Departamento de Nutrição, Faculdade de Saúde Pública, Universidade de São Paulo,  
19 São Paulo, Brasil.

20  
21 <sup>3</sup> Departamento de Políticas Públicas e Saúde Coletiva, Universidade Federal de São  
22 Paulo, São Paulo, Brasil.

23  
24 <sup>4</sup> Departamento de Medicina Preventiva, Faculdade de Medicina FMUSP, Universidade  
25 de São Paulo, São Paulo, Brasil.

26  
27 <sup>5</sup> Public Health Policy Evaluation Unit, School of Public Health, Imperial College London,  
28 London, United Kingdom.  
29  
30  
31  
32  
33

34  
35  
36  
37 **Corresponding author:** Fernanda Rauber, [rauber.fernanda@gmail.com](mailto:rauber.fernanda@gmail.com), Departamento  
38 de Nutrição, Faculdade de Saúde Pública, Universidade de São Paulo, Av. Dr. Arnaldo,  
39 715, São Paulo 01246-904, Brasil.  
40  
41  
42  
43

44 **Word count:** 3,599  
45  
46  
47  
48  
49  
50  
51  
52  
53  
54  
55  
56  
57  
58  
59  
60

## ABSTRACT

**Objectives:** to describe dietary sources of free sugars in different age groups of the UK population considering food groups classified according to the NOVA system and to estimate the proportion of excessive free sugars that could potentially be avoided by reducing consumption of their main sources.

**Design and setting:** Cross-sectional data from the UK National Diet and Nutrition Survey (2008–14) were analysed. Food items collected using a four-day food diary were classified according to the NOVA system.

**Participants:** 9,364 individuals aged 1.5 years and above.

**Main outcome measures:** Average dietary content of free sugars and proportion of individuals consuming more than 10% of total energy from free sugars.

**Data analysis:** Poisson regression was used to estimate the associations between each of the NOVA food group and intake of free sugars. We estimated the percent reduction in prevalence of excessive free sugar intake from eliminating ultra-processed foods and table sugar. Analyses were stratified by age group and adjusted for age, sex, ethnicity, region, and equivalised household income (sterling pounds).

**Results:** Ultra-processed foods account for 56.8% of total energy intake and 64.7% of total free sugars in the UK diet. Free sugars represent 12.4% of total energy intake and 61.3% of the sample exceeded the recommended limit of 10% energy from free sugars. This percentage was higher among children (74.9%) and adolescents (82.9%). Prevalence of excessive free sugar intake increased linearly across quintiles of ultra-processed food consumption for all age groups, except among the elderly. Eliminating ultra-processed foods could potentially reduce the prevalence of excessive free sugar intake by 47%.

**Conclusion:** Our findings suggest that actions to reduce the ultra-processed food consumption generally rich in free sugars could lead to substantial public health benefits.

**Keywords:** Food processing; Ultra-processed; Free sugar; United Kingdom.

## ARTICLE SUMMARY

### Strengths and limitations of this study

- Use of a large and nationally representative sample of the UK population, increasing generalisability.
- Use of data on free sugars rather than total sugars or sugar-sweetened beverages, which correspond to the guidelines relevant area of prioritisation.
- Use of NOVA system, which has been recognised as a valid tool for public health and nutrition research and policy by international organizations.
- Dietary data obtained by food diaries are subject to potential error and bias.
- UK national dietary survey collects limited information indicative of food processing (for example, place of meals and product brands), which may lead to misclassification of food items.

## INTRODUCTION

Excessive consumption of free sugar is associated with obesity, type 2 diabetes, dental caries, and several other health outcomes [1-4]. To address this associated health burden, the World Health Organization (WHO) [5] recommends that free sugars should be reduced to less than 10% of total energy intake and also suggests a level below 5% to obtain additional health benefits, such as reduction of dental caries. Achievement of this ambitious target will require bold and systematic efforts to reduce sugar across a variety of food products in most settings.

As defined by the NOVA food classification system, ultra-processed foods are industrial formulations of many ingredients, mostly of exclusive industrial use, that result from a sequence of industrial processes (hence ultra-processed) [6]. In some high-income countries, including the UK, ultra-processed foods account for more than half of total dietary energy intake [7-9]. Importantly, national dietary surveys conducted in high- and middle-income countries [8-12] have shown a strong and positive association between consumption of ultra-processed foods and excessive dietary added (or free) sugar intake. Free sugars include sugars added to foods by the manufacturer, cook and consumer, plus sugars naturally present in honey, syrups and fruit juices [5], while added sugars captures all free sugars, but exclude naturally occurring sugars in fruit juices.

Free sugar intake in the UK is high, ranging from 11 to 15% of total energy intake [13]. To address this, the UK has implemented a number of measures including a sugar-sweetened beverage levy in 2018. However, action on sugar sweetened beverages alone is unlikely to reduce population level sugar intake to WHO recommended levels. In a more recent publication, the voluntary sugar reduction programme continues being endorsed by the government, but other measures such as restriction of advertising and in-store promotions of some sugary foods are also being considered as strategies to reduce childhood obesity [14]. A better understanding of the key sources of sugar intake in the UK diet is required to inform policy development. This study aims to describe the dietary sources of free sugars in different age groups of the UK population taking into account food groups classified according to the NOVA classification system and estimate

1  
2  
3 the proportion of excessive free sugars that could be potentially avoided by reducing  
4 the consumption of their main dietary sources.  
5  
6  
7  
8

## 9 **METHODS**

### 10 **Data source and collection**

11  
12  
13  
14  
15  
16  
17  
18  
19 We used data from the National Diet and Nutrition Survey Rolling Programme  
20 (NDNS) years 1-6 (2008/09-2009/10, 2010/11-2011/12, 2012/13-2013/14) combined,  
21 which is a cross-sectional survey of people aged 1.5 years or older. The survey was  
22 designed to be representative of the UK population and provides comprehensive  
23 information on food intake. Details of the rationale, design, and methods of the survey  
24 have been described elsewhere [15]. Briefly, the sample was drawn from households  
25 randomly selected from the UK Postcode Address File, a list of all UK addresses. One  
26 adult (aged 19 years and older) and one child (aged 1.5–18 years), if available, were  
27 randomly selected from each household. Only a child was selected from some  
28 households to be part of a 'child boost' to ensure approximately equal numbers of  
29 children and adults. Participants (or in the case of children  $\leq 11$  years, their parent/carer)  
30 completed a four-day food diary and participated in an interview that included data on  
31 socio-demographic status.  
32  
33  
34  
35  
36  
37  
38  
39  
40  
41  
42

43 Participants were asked to report all foods and drinks consumed both within and  
44 outside the home. Portion sizes were estimated using household measures or weights  
45 from packaging. Once completed, diaries were checked by interviewers with  
46 respondents and missing details added to improve completeness. Diary days were  
47 randomly selected to ensure balanced representation of all days of the week. All  
48 individuals who completed three or four days of dietary recording were eligible for  
49 inclusion in the study, giving a sample size of 9,374 (4,738 adults and 4,636 children)  
50 participants for years 1 to 6 (2008/09 to 2013/14) combined.  
51  
52  
53  
54  
55  
56  
57

58 The food intake data from completed records were coded and edited using the  
59 software DINO (Diet In, Nutrients Out) and food and nutrient intakes estimated using  
60

1  
2  
3 nutrient composition data from the Department of Health's Nutrient Databank, updated  
4 for each survey year [16, 17]. Free sugars are defined as sugars added to foods by the  
5 manufacturer, cook or consumer, plus sugars naturally present in honey, syrups, fruit  
6 juices and fruit concentrates [5]. Intakes in the UK NDNS years 1-6 were expressed as  
7 non-milk extrinsic sugars (NMES). The term NMES captures all sugars defined by the  
8 term free sugars while also including half of the sugars present in dried, stewed or  
9 canned fruit. The NMES values could be slightly higher in some cases than the free sugar  
10 values, mostly in the non-ultra-processed food group since the term free sugar does not  
11 include sugars contributed by dried and processed fruits. Based on the assumption that  
12 those definitions are sufficiently similar for assessment and monitoring purposes [1,3],  
13 this study used the term free sugars.  
14  
15  
16  
17  
18  
19  
20  
21  
22

23  
24 Computerized raw data files and documentation from this survey were obtained  
25 under license from the UK Data Archive (<http://www.esds.ac.uk>). All relevant research  
26 ethics and governance committees approved the survey.  
27  
28  
29  
30  
31

### 32 **Food classification according to processing**

33  
34  
35  
36

37 We classified all recorded food items according to NOVA, a food classification  
38 system based on the nature, extent, and purpose of the industrial food processing [6].  
39 This classification includes four groups: 1) unprocessed or minimally processed foods  
40 (e.g. fresh, dry or frozen fruits or vegetables; grains, flours and pasta; pasteurized or  
41 power plain milk, plain yogurt, fresh or frozen meat); 2) processed culinary ingredients  
42 (e.g. table sugar, oils, butter, and salt); 3) processed foods (e.g. vegetables in brine,  
43 cheese, simple breads, fruits in syrup, canned fish); and 4) ultra-processed foods (e.g.  
44 soft drinks, sweet or savoury packaged snacks, confectionery; packaged breads and  
45 buns; reconstituted meat products and pre-prepared frozen or shelf-stable dishes) (**see**  
46 **Suppl. Table S1**). The detailed description of NOVA classification can be found elsewhere  
47 [6, 18].  
48  
49  
50  
51  
52  
53  
54  
55  
56

57 All foods in NDNS are coded as food number and grouped into subsidiary food  
58 groups (n = 155). When possible, subsidiary food groups were directly classified  
59  
60

1  
2  
3 according to NOVA (**see Suppl. Table S2**). When foods within a subsidiary food group  
4 pertained to different NOVA groups ( $n = 52$ ), it was the food codes instead of the group,  
5 which were individually classified. By doing so, we were able to classify each underlying  
6 ingredient of homemade dishes in its corresponding NOVA group. Subsidiary food  
7 groups as classified by NOVA are described in the Supplementary Table S2.  
8  
9  
10  
11

12  
13 Although the NDNS database was provided with most food items systematically  
14 disaggregated into their individual components, about 4% of composite food codes were  
15 still mixed dishes compiled from two or more single-ingredient food code [19]. The  
16 method we adopted to disaggregate food codes has been described previously [19].  
17 Using the core sample of years 1 to 4 (2008/09 to 2011/12) ( $n = 4,125$ ), we estimated  
18 that composite food codes represented only 3% of total calories. In this case, dishes  
19 were categorised according to the main constituent ingredient. Dishes in which a main  
20 constituent ingredient was not clearly identified (e.g. chicken and vegetable soup) were  
21 classified as a specific subgroup of freshly prepared dishes based on one or more  
22 unprocessed or minimally processed food (group 1). Non-caloric supplements were not  
23 included in the analyses.  
24  
25  
26  
27  
28  
29  
30  
31  
32  
33  
34  
35

### 36 **Covariates**

37  
38  
39  
40 Covariates included were age (years), sex, ethnicity (White, Mixed ethnic group,  
41 Black or Black British, Asian or Asian British and Other race), region (England North,  
42 England Central/Midlands, England South (including London), Scotland, Wales, and  
43 Northern Ireland), survey year (years 1-6), and equivalised household income  
44 (equivalised for different household sizes and composition using the McClements  
45 equivalence scale [15]). Due to the significant proportion of missing values for the  
46 equivalised household income (12.8%), we applied multiple imputation by chained  
47 equation method based on age, sex, ethnicity, excessive free sugars intake and ultra-  
48 processed food consumption. Multiple imputation was performed 20 times, and the  
49 Monte Carlo error analysis showed good statistical reproducibility of the results [20].  
50  
51  
52  
53  
54  
55  
56  
57  
58  
59  
60

## Data analysis

For each survey day and age group (1.5 – 10 years, 11 – 18 years, 19 – 64 years, and  $\geq 64$  years), we defined extreme total energy intake outliers as values below the 1<sup>st</sup> and above the 99th percentiles [21]. Based on these criteria, we excluded ten individuals who had all days of food diary classified as outliers. In total, 9,364 (4,729 adults and 4,635 children) participants were eligible for inclusion in the analyses and more than 91% completed the four food diary days. We used the mean of all available days of food diary for each individual.

Food items were sorted into mutually exclusive food groups according to NOVA classification. We combined the group of unprocessed or minimally processed foods with the group of processed culinary ingredients, as foods belonging to these two groups are usually combined together in culinary preparations and, therefore, consumed together. Thus, we performed the analyses considering three groups of foods: unprocessed or minimally processed foods and processed culinary ingredients, processed foods, and ultra-processed foods.

First, we estimated the distribution of total energy and free sugars intake according to the food groups. Then, we calculated the mean free sugars intake of the overall diet and the prevalence of excessive intake of free sugars. We used the WHO recommendations [5] to assess the excessive intake of free sugars ( $\geq 10\%$  of total energy). Analyses using the UK recommendations to further limit free sugars intake to less than 5% of total energy intake are presented in a supplementary table (**Suppl. Table S3**). Analyses were carried out for the entire population and also stratified by age group.

Next, the prevalence of excessive intake of free sugars ( $\geq 10\%$  of total energy) was compared across quintiles of the energy share provided by each of the three food groups. Poisson regression was used to estimate prevalence ratios (PR) and 95% confidence intervals for the associations between each of the three NOVA food group quintiles and prevalence of individuals consuming more than 10% of total energy from free sugars. Tests of linear trend were performed to evaluate the quintiles as a single continuous variable. All analyses were stratified by age group. Multiple regression models were also performed to adjust for age, sex, ethnicity, region, survey year, and



1  
2  
3 equivalised household income (sterling pounds). Analyses using the entire population  
4 are presented in a supplementary table (**Suppl. Table S4**). We also evaluated the extent  
5 to which the association between the exposure (dietary contribution of NOVA food  
6 groups) and the dietary content in free sugars changed according to the survey year, by  
7 including a multiplicative interaction term (survey year\*dietary contribution of NOVA  
8 food groups) in the fully adjusted models.  
9

10  
11  
12  
13  
14 Finally, we estimated the proportion of excessive free sugar intake that could be  
15 potentially avoided if exposure to the risk factors were eliminated (theoretical minimum  
16 risk exposure level scenarios) [22, 23]. The counterfactual scenarios were defined  
17 considering the main dietary sources of free sugars. The first counterfactual scenario  
18 assumed no consumption of ultra-processed food (potentially hidden sugars), while in  
19 the second scenario table sugar consumption was set to zero. Table sugar included  
20 honey, molasses, maple syrup (100%), and sugar added to coffee/juice and homemade  
21 dishes (potentially sugar that can be measured by the consumer). Examples of  
22 homemade dishes include: biscuits, fruit pies, buns cakes and pastries, cereal based milk  
23 puddings, and sponge pudding (**see Suppl. Table S2**).  
24

25  
26  
27  
28  
29  
30  
31  
32  
33  
34  
35  
36  
37  
38  
39  
40  
41  
42  
43  
44  
45  
46  
47  
48  
49  
50  
51  
52  
53  
54  
55  
56  
57  
58  
59  
60  
In both scenarios, we first calculated the prevalence of excessive free sugar intake  
in the UK population ( $P_{population}$ ). We then estimated the predicted prevalence of  
excessive free sugar intake that would be expected had the consumption of each of  
these main sources of free sugars being zero ( $P_{nonexposed}$ ). Lastly, we calculated the  
proportion of excessive free sugar intake that could be potentially avoided in each  
scenario using the following formula:  $(P_{population} - P_{nonexposed}) / P_{population}$ . Prevalences were  
adjusted for sex, age, ethnicity, region, survey year, and household income.'

NDNS study weights were used in all analyses to account for sampling and non-  
response error. All statistical analyses were carried out using Stata Statistical Software  
version 14. The  $p$  values reported were two-tailed, and a threshold of <0.01 was  
considered for statistically significant associations.

### **Patient and public involvement**

Patients and/or public were not involved in in the design or conduct of this study.

## RESULTS

Ultra-processed foods account for 56.8% of total energy intake and 64.7% of total free sugars in the UK diet. Unprocessed or minimally processed foods and processed culinary ingredients represented an additional 34.3% of total energy intake and 23.8% of free sugars, and processed foods the remaining 8.8% of total energy intake and 11.5% of free sugars. Ultra-processed foods accounted for a higher percentage of total energy intake among children (63.5%) and adolescents (68%). The average UK daily intake of free sugars was 12.4% (SE 0.1) of total energy intake and 61.3% of British exceeded the recommended limit of 10% energy from free sugars. This proportion was even higher among children (74.9%) and adolescents (82.9%) (**Table 1**).

Table 1. Dietary contribution of NOVA food groups and indicators of the dietary content in free sugars according to age groups. UK population aged 1.5 years or over (2008–14).

| Age groups     | Dietary contribution (% of total energy intake)                           |             |                 |             |                       |             | % of total energy intake from free sugars                                 |             |                 |             |                       |             | Individuals with ≥10% of total energy intake from free sugars |             |              |              |              |
|----------------|---------------------------------------------------------------------------|-------------|-----------------|-------------|-----------------------|-------------|---------------------------------------------------------------------------|-------------|-----------------|-------------|-----------------------|-------------|---------------------------------------------------------------|-------------|--------------|--------------|--------------|
|                | Unprocessed or minimally processed foods + Processed culinary ingredients |             | Processed foods |             | Ultra-processed foods |             | Unprocessed or minimally processed foods + Processed culinary ingredients |             | Processed foods |             | Ultra-processed foods |             | Total                                                         |             | Overall diet |              |              |
|                | <i>Mean</i>                                                               |             | <i>SE</i>       |             | <i>Mean</i>           |             | <i>SE</i>                                                                 |             | <i>Mean</i>     |             | <i>SE</i>             |             |                                                               |             | <i>%</i>     | <i>95%CI</i> |              |
| 1.5 - 10 years | 31.96                                                                     | 0.33        | 4.51            | 0.10        | 63.53                 | 0.34        | 18.82                                                                     | 0.45        | 5.15            | 0.22        | 76.03                 | 0.49        | 14.00                                                         | 0.14        | 74.94        | 72.78        | 76.99        |
| 11 - 18 years  | 27.25                                                                     | 0.37        | 4.75            | 0.16        | 68.00                 | 0.40        | 18.63                                                                     | 0.55        | 2.48            | 0.19        | 78.89                 | 0.57        | 15.78                                                         | 0.19        | 82.91        | 80.72        | 84.90        |
| 19 - 64 years  | 34.75                                                                     | 0.32        | 10.37           | 0.19        | 54.89                 | 0.35        | 24.68                                                                     | 0.50        | 12.96           | 0.38        | 62.36                 | 0.56        | 11.93                                                         | 0.14        | 56.59        | 54.47        | 58.68        |
| ≥65 years      | 38.57                                                                     | 0.49        | 8.45            | 0.29        | 52.98                 | 0.52        | 26.77                                                                     | 0.96        | 15.38           | 0.69        | 57.86                 | 1.01        | 11.36                                                         | 0.23        | 56.83        | 52.98        | 60.59        |
| <b>Total</b>   | <b>34.35</b>                                                              | <b>0.22</b> | <b>8.83</b>     | <b>0.13</b> | <b>56.82</b>          | <b>0.24</b> | <b>23.78</b>                                                              | <b>0.36</b> | <b>11.46</b>    | <b>0.27</b> | <b>64.75</b>          | <b>0.40</b> | <b>12.44</b>                                                  | <b>0.10</b> | <b>61.27</b> | <b>59.76</b> | <b>62.76</b> |

For peer review only

1  
2  
3 No significant interaction was observed between the exposure and the survey year  
4 for the total energy intake from free sugars (unprocessed or minimally processed foods  
5 + processed culinary ingredients:  $p = 0.254$ ; processed foods:  $p = 0.538$ ; ultra-processed  
6 foods:  $p = 0.137$ ), nor for the prevalence of excessive intake of free sugars (unprocessed  
7 or minimally processed foods + processed culinary ingredients:  $p = 0.609$ ; processed  
8 foods:  $p = 0.262$ ; ultra-processed foods:  $p = 0.258$ ). Even so, we included variable survey  
9 year (1-6) in the adjusted model.  
10  
11  
12  
13  
14  
15

16 Indicators of the dietary content in free sugars according to quintiles of the dietary  
17 contribution of NOVA food groups stratified by age groups are shown in **Tables 2 to 5**  
18 (1.5 – 10 years, 11 – 18 years, 19 – 64 years, and  $\geq 64$  years, respectively). The dietary  
19 contents of free sugars increased linearly across quintiles of ultra-processed food  
20 consumption for children (from 10.4% in the lowest quintile to 15.3% in the highest  
21 quintile), adolescents (from 12.7% to 17.4%, respectively) and adults (from 9.6% to  
22 15.2%, respectively), whereas the increase for elderly was not significant (from 10.6% to  
23 11.7%, respectively). The prevalence of excessive free sugar intake also increased  
24 linearly across quintiles of ultra-processed food consumption for all age groups, except  
25 among the elderly group. Children in the highest quintiles of ultra-processed food  
26 consumption had a prevalence of excessive free sugar intake 60% higher (PRadj 1.6; 95%  
27 CI 1.3 to 1.9) than those in the lowest quintile group. The same trend was observed for  
28 adolescents (PRadj 1.6 95% IC 1.2 – 1.9) and adults (PRadj 1.7 95% IC 1.5 – 1.9), while  
29 no difference in prevalence was observed for elderly (PRadj 1.1 95% IC 0.8 – 1.4).  
30  
31  
32  
33  
34  
35  
36  
37  
38  
39  
40  
41

42 Opposite trends were observed for the group of unprocessed or minimally  
43 processed foods and processed culinary ingredients, where the prevalence of excessive  
44 free sugars intake decreased from the first to the last quintile of these food groups in all  
45 age groups. The prevalence of excessive free sugars intake also decreased from the first  
46 to the last quintile of processed foods, but only in adolescents and adults.  
47  
48  
49  
50  
51  
52  
53  
54  
55  
56  
57  
58  
59  
60

**Table 2. Indicators of the dietary content in free sugars according to quintiles of the dietary contribution of NOVA food groups in the UK population aged 1.5 - 10 years (2008-14).**

| Dietary contribution (% of total energy intake)                                  |             |            |            | % of total energy intake from free sugars |           | Individuals with $\geq 10\%$ of total energy intake from free sugars |                   |                          |              |      |
|----------------------------------------------------------------------------------|-------------|------------|------------|-------------------------------------------|-----------|----------------------------------------------------------------------|-------------------|--------------------------|--------------|------|
| <i>Quintile</i>                                                                  | <i>mean</i> | <i>min</i> | <i>max</i> | <i>mean</i>                               | <i>SE</i> | <i>%</i>                                                             | <i>PR*</i>        | <i>PRadj<sup>i</sup></i> | <i>95%CI</i> |      |
| <b>Unprocessed or minimally processed foods + Processed culinary ingredients</b> |             |            |            |                                           |           |                                                                      |                   |                          |              |      |
| 1st                                                                              | 15.36       | 0.00       | 20.92      | 15.80                                     | 0.33      | 82.99                                                                | 1.00              | 1.00                     | –            | –    |
| 2nd                                                                              | 24.86       | 20.93      | 28.41      | 14.60                                     | 0.30      | 79.62                                                                | 0.96              | 0.95                     | 0.89         | 1.02 |
| 3rd                                                                              | 31.57       | 28.46      | 34.96      | 14.37                                     | 0.28      | 81.68                                                                | 0.98              | 0.99                     | 0.93         | 1.06 |
| 4th                                                                              | 39.30       | 34.98      | 43.86      | 13.66                                     | 0.36      | 73.40                                                                | 0.88              | 0.91                     | 0.84         | 0.99 |
| 5th                                                                              | 52.46       | 43.97      | 79.93      | 11.13 <sup>‡</sup>                        | 0.26      | 53.87                                                                | 0.65 <sup>‡</sup> | 0.69 <sup>‡</sup>        | 0.61         | 0.78 |
| <b>Processed foods</b>                                                           |             |            |            |                                           |           |                                                                      |                   |                          |              |      |
| 1st                                                                              | 0.41        | 0.00       | 1.33       | 13.93                                     | 0.29      | 72.58                                                                | 1.00              | 1.00                     | –            | –    |
| 2nd                                                                              | 2.56        | 1.34       | 3.79       | 14.82                                     | 0.30      | 80.23                                                                | 1.11              | 1.11                     | 1.03         | 1.19 |
| 3rd                                                                              | 5.18        | 3.79       | 6.82       | 13.77                                     | 0.25      | 73.85                                                                | 1.02              | 1.04                     | 0.95         | 1.13 |
| 4th                                                                              | 8.96        | 6.83       | 11.95      | 13.37                                     | 0.31      | 73.23                                                                | 1.01              | 1.02                     | 0.93         | 1.12 |
| 5th                                                                              | 16.05       | 12.04      | 41.71      | 13.16                                     | 0.52      | 69.20                                                                | 0.95              | 0.99                     | 0.86         | 1.14 |
| <b>Ultra-processed foods</b>                                                     |             |            |            |                                           |           |                                                                      |                   |                          |              |      |
| 1st                                                                              | 36.38       | 15.11      | 43.67      | 10.35                                     | 0.38      | 46.41                                                                | 1.00              | 1.00                     | –            | –    |
| 2nd                                                                              | 49.00       | 43.72      | 53.03      | 12.37                                     | 0.30      | 66.78                                                                | 1.44              | 1.39                     | 1.15         | 1.70 |
| 3rd                                                                              | 57.17       | 53.06      | 60.95      | 13.84                                     | 0.37      | 74.22                                                                | 1.60              | 1.50                     | 1.24         | 1.81 |
| 4th                                                                              | 65.58       | 60.96      | 70.14      | 14.48                                     | 0.26      | 80.95                                                                | 1.74              | 1.62                     | 1.35         | 1.95 |
| 5th                                                                              | 78.05       | 70.15      | 100        | 15.32 <sup>‡</sup>                        | 0.25      | 81.41                                                                | 1.75 <sup>‡</sup> | 1.62 <sup>‡</sup>        | 1.35         | 1.95 |

\*PR=Prevalence ratios estimated using Poisson regression.

<sup>i</sup>PRadj=Prevalence ratios adjusted for sex, age, race/ethnicity (White, Mixed ethnic group, Black or Black British, Asian or Asian British and Other race), region, survey year, and household income.

<sup>‡</sup>Significant linear trend across all quintiles ( $p \leq 0.001$ ).

**Table 3. Indicators of the dietary content in free sugars according to quintiles of the dietary contribution of NOVA food groups in the UK population aged 11 - 18 years (2008-14).**

| Dietary contribution (% of total energy intake)                                  |             |            |            | % of total energy intake from free sugars |           | Individuals with $\geq 10\%$ of total energy intake from free sugars |                   |                          |              |      |
|----------------------------------------------------------------------------------|-------------|------------|------------|-------------------------------------------|-----------|----------------------------------------------------------------------|-------------------|--------------------------|--------------|------|
| <i>Quintile</i>                                                                  | <i>mean</i> | <i>min</i> | <i>max</i> | <i>mean</i>                               | <i>SE</i> | <i>%</i>                                                             | <i>PR*</i>        | <i>PRadj<sup>i</sup></i> | <i>95%CI</i> |      |
| <b>Unprocessed or minimally processed foods + Processed culinary ingredients</b> |             |            |            |                                           |           |                                                                      |                   |                          |              |      |
| 1st                                                                              | 14.43       | 0.00       | 20.89      | 17.28                                     | 0.36      | 88.89                                                                | 1.00              | 1.00                     | –            | –    |
| 2nd                                                                              | 24.61       | 20.92      | 28.43      | 15.87                                     | 0.35      | 84.30                                                                | 0.95              | 0.95                     | 0.89         | 1.01 |
| 3rd                                                                              | 31.46       | 28.44      | 34.93      | 15.50                                     | 0.37      | 81.82                                                                | 0.92              | 0.92                     | 0.86         | 0.99 |
| 4th                                                                              | 39.24       | 34.98      | 43.84      | 13.96                                     | 0.43      | 78.15                                                                | 0.88              | 0.89                     | 0.82         | 0.96 |
| 5th                                                                              | 52.96       | 43.88      | 79.86      | 13.60 <sup>‡</sup>                        | 0.80      | 66.92                                                                | 0.75 <sup>‡</sup> | 0.77 <sup>‡</sup>        | 0.66         | 0.88 |
| <b>Processed foods</b>                                                           |             |            |            |                                           |           |                                                                      |                   |                          |              |      |
| 1st                                                                              | 0.29        | 0.00       | 1.33       | 17.18                                     | 0.41      | 85.11                                                                | 1.00              | 1.00                     | –            | –    |
| 2nd                                                                              | 2.56        | 1.34       | 3.79       | 15.81                                     | 0.35      | 81.74                                                                | 0.96              | 0.96                     | 0.90         | 1.03 |
| 3rd                                                                              | 5.16        | 3.80       | 6.81       | 15.62                                     | 0.35      | 86.87                                                                | 1.02              | 1.02                     | 0.96         | 1.09 |
| 4th                                                                              | 8.94        | 6.82       | 11.95      | 14.52                                     | 0.43      | 79.40                                                                | 0.93              | 0.93                     | 0.86         | 1.01 |
| 5th                                                                              | 17.53       | 12.05      | 41.62      | 13.68 <sup>‡</sup>                        | 0.57      | 74.89                                                                | 0.88 <sup>‡</sup> | 0.87 <sup>‡</sup>        | 0.78         | 0.99 |
| <b>Ultra-processed foods</b>                                                     |             |            |            |                                           |           |                                                                      |                   |                          |              |      |
| 1st                                                                              | 35.29       | 18.40      | 42.94      | 12.72                                     | 1.39      | 56.18                                                                | 1.00              | 1.00                     | –            | –    |
| 2nd                                                                              | 49.35       | 43.70      | 53.03      | 13.65                                     | 0.56      | 75.73                                                                | 1.35              | 1.34                     | 1.03         | 1.74 |
| 3rd                                                                              | 56.91       | 53.08      | 60.96      | 14.19                                     | 0.40      | 79.24                                                                | 1.41              | 1.40                     | 1.09         | 1.80 |
| 4th                                                                              | 65.63       | 60.96      | 70.13      | 14.99                                     | 0.32      | 80.76                                                                | 1.44              | 1.42                     | 1.11         | 1.82 |
| 5th                                                                              | 79.05       | 70.14      | 100        | 17.37 <sup>‡</sup>                        | 0.29      | 89.04                                                                | 1.58 <sup>‡</sup> | 1.56 <sup>‡</sup>        | 1.23         | 1.99 |

\*PR=Prevalence ratios estimated using Poisson regression.

<sup>i</sup>PRadj=Prevalence ratios adjusted for sex, age, race/ethnicity (White, Mixed ethnic group, Black or Black British, Asian or Asian British and Other race), region, survey year, and household income.

<sup>‡</sup>Significant linear trend across all quintiles ( $p \leq 0.001$ ).

**Table 4. Indicators of the dietary content in free sugars according to quintiles of the dietary contribution of NOVA food groups in the UK population aged 19 - 64 years (2008-14).**

| Dietary contribution (% of total energy intake)                                  |             |            |            | % of total energy intake from free sugars |           | Individuals with $\geq 10\%$ of total energy intake from free sugars |                   |                          |              |      |
|----------------------------------------------------------------------------------|-------------|------------|------------|-------------------------------------------|-----------|----------------------------------------------------------------------|-------------------|--------------------------|--------------|------|
| <i>Quintile</i>                                                                  | <i>mean</i> | <i>min</i> | <i>max</i> | <i>mean</i>                               | <i>SE</i> | <i>%</i>                                                             | <i>PR*</i>        | <i>PRadj<sup>i</sup></i> | <i>95%CI</i> |      |
| <b>Unprocessed or minimally processed foods + Processed culinary ingredients</b> |             |            |            |                                           |           |                                                                      |                   |                          |              |      |
| 1st                                                                              | 15.06       | 0.00       | 20.92      | 15.11                                     | 0.36      | 35.87                                                                | 1.00              | –                        | –            |      |
| 2nd                                                                              | 24.93       | 20.95      | 28.41      | 12.87                                     | 0.31      | 31.12                                                                | 0.85              | 0.87                     | 0.79         | 0.96 |
| 3rd                                                                              | 31.65       | 28.43      | 34.96      | 11.97                                     | 0.31      | 30.87                                                                | 0.79              | 0.85                     | 0.77         | 0.94 |
| 4th                                                                              | 38.95       | 34.97      | 43.88      | 11.01                                     | 0.28      | 28.45                                                                | 0.66              | 0.72                     | 0.64         | 0.80 |
| 5th                                                                              | 54.24       | 43.93      | 91.90      | 9.89 <sup>‡</sup>                         | 0.25      | 25.28                                                                | 0.57 <sup>‡</sup> | 0.62 <sup>‡</sup>        | 0.55         | 0.71 |
| <b>Processed foods</b>                                                           |             |            |            |                                           |           |                                                                      |                   |                          |              |      |
| 1st                                                                              | 0.28        | 0.00       | 1.32       | 13.09                                     | 0.50      | 59.14                                                                | 1.00              | 1.00                     | –            |      |
| 2nd                                                                              | 2.60        | 1.34       | 3.79       | 12.82                                     | 0.41      | 60.65                                                                | 1.03              | 1.04                     | 0.92         | 1.19 |
| 3rd                                                                              | 5.35        | 3.79       | 6.82       | 12.17                                     | 0.30      | 61.42                                                                | 1.04              | 1.04                     | 0.92         | 1.18 |
| 4th                                                                              | 9.36        | 6.82       | 12.03      | 11.62                                     | 0.26      | 55.92                                                                | 0.95              | 0.98                     | 0.87         | 1.11 |
| 5th                                                                              | 19.80       | 12.04      | 65.22      | 11.27 <sup>‡</sup>                        | 0.22      | 52.47                                                                | 0.89 <sup>‡</sup> | 0.92 <sup>‡</sup>        | 0.82         | 1.03 |
| <b>Ultra-processed foods</b>                                                     |             |            |            |                                           |           |                                                                      |                   |                          |              |      |
| 1st                                                                              | 34.45       | 1.82       | 43.67      | 9.62                                      | 0.27      | 39.42                                                                | 1.00              | 1.00                     | –            |      |
| 2nd                                                                              | 48.70       | 43.69      | 53.04      | 11.11                                     | 0.25      | 53.34                                                                | 1.35              | 1.30                     | 1.13         | 1.50 |
| 3rd                                                                              | 57.08       | 53.06      | 60.96      | 11.83                                     | 0.29      | 56.84                                                                | 1.44              | 1.37                     | 1.19         | 1.57 |
| 4th                                                                              | 65.34       | 60.96      | 70.14      | 13.09                                     | 0.32      | 66.31                                                                | 1.68              | 1.57                     | 1.37         | 1.79 |
| 5th                                                                              | 78.04       | 70.15      | 100        | 15.21 <sup>‡</sup>                        | 0.38      | 74.30                                                                | 1.88 <sup>‡</sup> | 1.67 <sup>‡</sup>        | 1.46         | 1.92 |

\*PR=Prevalence ratios estimated using Poisson regression.

<sup>i</sup>PRadj=Prevalence ratios adjusted for sex, age, race/ethnicity (White, Mixed ethnic group, Black or Black British, Asian or Asian British and Other race), region, survey year, and household income.

<sup>‡</sup>Significant linear trend across all quintiles ( $p \leq 0.001$ ).

**Table 5. Indicators of the dietary content in free sugars according to quintiles of the dietary contribution of NOVA food groups in the UK population aged 65 years or over (2008-14).**

| Dietary contribution (% of total energy intake)                                  |       |       |       | % of total energy intake from free sugars |      | Individuals with $\geq 10\%$ of total energy intake from free sugars |                   |                    |       |      |
|----------------------------------------------------------------------------------|-------|-------|-------|-------------------------------------------|------|----------------------------------------------------------------------|-------------------|--------------------|-------|------|
| Quintile                                                                         | mean  | min   | max   | mean                                      | SE   | %                                                                    | PR*               | PRadj <sup>†</sup> | 95%CI |      |
| <b>Unprocessed or minimally processed foods + Processed culinary ingredients</b> |       |       |       |                                           |      |                                                                      |                   |                    |       |      |
| 1st                                                                              | 16.63 | 6.34  | 20.82 | 11.67                                     | 0.87 | 56.16                                                                | 1.00              | 1.00               | –     | –    |
| 2nd                                                                              | 25.04 | 20.95 | 28.36 | 12.83                                     | 0.61 | 67.39                                                                | 1.20              | 1.19               | 0.90  | 1.57 |
| 3rd                                                                              | 32.06 | 28.44 | 34.90 | 11.98                                     | 0.48 | 64.37                                                                | 1.15              | 1.15               | 0.87  | 1.52 |
| 4th                                                                              | 39.30 | 34.98 | 43.85 | 10.93                                     | 0.44 | 53.96                                                                | 0.96              | 0.97               | 0.73  | 1.28 |
| 5th                                                                              | 52.26 | 43.89 | 78.36 | 10.70                                     | 0.42 | 50.94                                                                | 0.91 <sup>‡</sup> | 0.91 <sup>‡</sup>  | 0.69  | 1.21 |
| <b>Processed foods</b>                                                           |       |       |       |                                           |      |                                                                      |                   |                    |       |      |
| 1st                                                                              | 0.38  | 0.00  | 1.32  | 9.70                                      | 0.72 | 43.52                                                                | 1.00              | 1.00               | –     | –    |
| 2nd                                                                              | 2.42  | 1.34  | 3.78  | 12.13                                     | 0.56 | 64.30                                                                | 1.48              | 1.49               | 1.14  | 1.96 |
| 3rd                                                                              | 5.23  | 3.79  | 6.81  | 12.16                                     | 0.45 | 65.00                                                                | 1.49              | 1.52               | 1.17  | 1.98 |
| 4th                                                                              | 9.27  | 6.82  | 12.02 | 11.10                                     | 0.47 | 54.46                                                                | 1.25              | 1.27               | 0.96  | 1.67 |
| 5th                                                                              | 19.10 | 12.04 | 50.86 | 11.23                                     | 0.46 | 53.62                                                                | 1.23              | 1.29               | 0.97  | 1.69 |
| <b>Ultra-processed foods</b>                                                     |       |       |       |                                           |      |                                                                      |                   |                    |       |      |
| 1st                                                                              | 35.98 | 7.79  | 43.69 | 10.63                                     | 0.49 | 47.63                                                                | 1.00              | 1.00               | –     | –    |
| 2nd                                                                              | 48.67 | 43.74 | 53.02 | 11.30                                     | 0.48 | 58.67                                                                | 1.23              | 1.20               | 0.97  | 1.47 |
| 3rd                                                                              | 56.97 | 53.05 | 60.91 | 11.61                                     | 0.45 | 59.89                                                                | 1.26              | 1.21               | 0.98  | 1.50 |
| 4th                                                                              | 64.99 | 61.01 | 70.08 | 12.01                                     | 0.54 | 65.53                                                                | 1.38              | 1.35               | 1.09  | 1.66 |
| 5th                                                                              | 75.66 | 70.17 | 92.30 | 11.67                                     | 0.70 | 53.75                                                                | 1.13              | 1.06               | 0.81  | 1.40 |

\*PR=Prevalence ratios estimated using Poisson regression.

<sup>†</sup>PRadj=Prevalence ratios adjusted for sex, age, race/ethnicity (White, Mixed ethnic group, Black or Black British, Asian or Asian British and Other race), region, survey year, and household income.

<sup>‡</sup>Significant linear trend across all quintiles ( $p \leq 0.001$ ).

In our counterfactual scenarios, we calculated the percentage of excessive free sugar intake avoided if the consumption of ultra-processed foods and table sugar were zero (**Figure 1**). We estimated that about 47% of the prevalence of excessive free sugars intake in the UK population could be potentially avoided if the consumption of ultra-processed foods was eliminated. Eliminating table sugar could potentially avoid 9.4% of the prevalence of excessive free sugars intake. This greater reduction in the percentage of excessive free sugar intake due to elimination of ultra-processed foods, relative to table sugar, was observed in all age groups, except in the elderly group where both scenarios had similar impacts on total free sugar intake.



## DISCUSSION

In this large, nationally representative sample of the UK population, higher consumption of ultra-processed food was associated with greater dietary content of free sugars in children, adolescents, and adults. Using theoretical minimum risk exposure level scenarios, we also showed that by eliminating ultra-processed food consumption, the prevalence of excessive free sugar intake (10% or more of total energy intake) could be potentially reduced from 60% to 31%. In children and adolescents, the potential reduction could be from 74% to 45% and from 83% to 53%, respectively.

Our findings confirm an excessive consumption of free sugars in the UK diet [13] and show that ultra-processed foods contributed nearly 65% of all free sugars in all age groups and nearly 80% in children and adolescents. Unprocessed or minimally processed foods (mostly fresh juice) and processed culinary ingredients (mostly table sugar) contributed between 19% and 27% of the dietary content of free sugars, while processed foods provided the lowest contribution in all age groups.

Our findings are similar to previous studies conducted in high- and middle-income countries that have shown strong associations between the intake of ultra-processed foods and the dietary content of free sugars [8-11]. A previous study conducted in Chile similarly showed that the association between ultra-processed food consumption and the dietary content of added sugars is more pronounced among children and adolescents [12]. In our study there was no association between ultra-processed food consumption and dietary content of free sugars among the elderly, probably due to differences in the type of ultra-processed foods consumed in this age group, with salted products more likely to be consumed than the sweetened products.

There is strong evidence that the high consumption of free sugars contributes to excess obesity, type 2 diabetes, dyslipidaemia, hypertension and coronary heart disease [2-4]. Consequently, most dietary recommendations now advise limiting free sugar intake, but more focused efforts are needed to put this recommendation into practice. Changing personal behaviour and choice alone is not an effective or realistic option as our findings confirm that the majority of free sugar is added to food before it is marketed and sold. Voluntary agreements between industry and government have been shown

1  
2  
3 repeatedly to be ineffective in improving public health [24]. This is confirmed by recent  
4 UK experience where the early stages of the government's sugar reduction programme,  
5 which challenged the food industry to voluntarily cut sugar in some products, has  
6 produced only slow progress toward proposed targets [25]. Thus, more drastic measures  
7 that change the availability, price and marketing of these products is necessary.  
8  
9  
10  
11

12  
13 The analyses presented here suggest that actions to reduce the consumption of  
14 ultra-processed foods often rich in free sugars could lead to larger public health benefits.  
15 Policies concerning the use of fiscal measures to reduce intake of free sugars and  
16 improve diet quality should consider extending beyond artificially sweetened beverages  
17 to include the main driver of excessive free sugar intake, including dairy drinks, cakes,  
18 biscuits and confectionery [13].  
19  
20  
21  
22  
23

24 To our knowledge, this is the first study to examine the association between  
25 consumption of ultra-processed foods, as defined per NOVA [6], and dietary content of  
26 free sugar in different age groups of the UK population. The use of NOVA is a key  
27 strength of the study as it classified foods by their level of processing level using  
28 standardised and objective criteria. NOVA has been recognised as a valid tool for public  
29 health and nutrition research and policy by the Food and Agricultural Organization of  
30 the United Nations [26] and the Pan American Health Organization [27]. In addition, we  
31 used data from the NDNS - a large and nationally representative sample of the UK  
32 population, applying weighting to reduce any sampling and non-response bias. Unlike  
33 household budget data, food diaries employed in the NDNS take food wastage into  
34 account, include food eaten out of home, and do not assume that all individuals within  
35 a household consume the same diet. Importantly, the dietary data also allowed for the  
36 disaggregation of dishes into their constituents and classification of the underlying  
37 ingredients, which enabled the calculation of more precise estimates of intakes of each  
38 NOVA group and reduced misclassification.  
39  
40  
41  
42  
43  
44  
45  
46  
47  
48  
49  
50  
51

52 Potential limitations should be considered. The dietary data we used were self-  
53 reported and may be subject to misclassification. A constant limitation of dietary  
54 assessment methods is underreporting of some foods (particularly unhealthy foods),  
55 though food diaries are recognised to be one of the most comprehensive methods for  
56 assessing dietary intake. Possible underreporting of unhealthy foods may lead to an  
57  
58  
59  
60

1  
2  
3 underestimation of the dietary contribution of ultra-processed foods and the overall  
4 intake of free sugars, but may less likely affect the association between these variables.  
5  
6 Nevertheless, accurate and valid NDNS data were achieved through optimal methods  
7 for collecting dietary intake [28] which helped to minimise missing information. NDNS  
8 collects limited information indicative of food processing (for example, place of meals  
9 and product brands), which may lead to misclassification of food items. This bias is more  
10 likely for a small number of specific food items such as pizza where there is insufficient  
11 information for classification purposes (see **Suppl. Table S2**). In those cases, the most  
12 frequently consumed alternative (culinary preparation or manufactured product) was  
13 chosen. Finally, our theoretical minimum risk exposure models estimate the potential  
14 impact of eliminating each of the main sources of free sugars on excessive free sugar  
15 intake, ignoring substitutions that may occur in the consumption of other foods.  
16 Although our findings suggest that greater reduction in excessive free sugar intake could  
17 be achieved by eliminating ultra-processed food consumption, guidance to the public  
18 about reducing the consumption of table sugar remains an important component of any  
19 public health guidance.  
20  
21  
22  
23  
24  
25  
26  
27  
28  
29  
30  
31  
32  
33  
34

## 35 **Conclusions**

36  
37 Almost half of excessive intake of free sugars in the UK can be attributed to ultra-  
38 processed foods. Policies to reduce sugar consumption should focus on minimizing  
39 consumption of ultra-processed foods and replacing them with unprocessed or  
40 minimally processed foods alternatives. The study adds to a growing body of evidence  
41 that ultra-processed foods are a major contributor to growth of diet related non-  
42 communicable diseases globally.  
43  
44  
45  
46  
47  
48  
49  
50

51 **Author contributions:** CAM, EMS, FR, MLdCL, and RBL designed the research. FR and  
52 RBL undertook data management and analysis. CAM, CM, EMS, FR, LFMR, MLdCL, and  
53 RBL interpreted the data. FR wrote the first draft of the manuscript. All authors read,  
54 edited and approved the final manuscript.  
55  
56  
57  
58  
59  
60

1  
2  
3 **Funding:** This work was supported by the Fundação de Amparo à Pesquisa do Estado de  
4 São Paulo (FAPESP), grant numbers 2015/14900-9, 2016/14302-7 (FR is a beneficiary of  
5 a postdoctoral fellowship), and 2014/25614-4 (LFMR is a beneficiary of a doctoral  
6 fellowship). FAPESP had no role in the design, analysis or writing of this manuscript.  
7  
8  
9

10  
11 **Competing interests:** None declared.  
12

13 **Data sharing statement:** This study is based on open data of the UK population that is  
14 available in the UK Data Archive website (<http://www.esds.ac.uk>).  
15  
16  
17  
18  
19  
20  
21  
22  
23  
24  
25  
26  
27  
28  
29  
30  
31  
32  
33  
34  
35  
36  
37  
38  
39  
40  
41  
42  
43  
44  
45  
46  
47  
48  
49  
50  
51  
52  
53  
54  
55  
56  
57  
58  
59  
60

For peer review only

**REFERENCES**

1. Scientific Advisory Committee on Nutrition. SACN's Sugars and Health Recommendations: Why 5%. London, UK: Scientific Advisory Committee on Nutrition, Department of Health, 2015.
2. Te Morenga LA, Howatson AJ, Jones RM, Mann J. Dietary sugars and cardiometabolic risk: systematic review and meta-analyses of randomized controlled trials of the effects on blood pressure and lipids. *Am J Clin Nutr* 2014;100(1):65-79.
3. Scientific Advisory Committee on Nutrition. Carbohydrates and Health Report. London, UK: Scientific Advisory Committee on Nutrition, Department of Health, 2015.
4. Te Morenga L, Mallard S, Mann J. Dietary sugars and body weight: systematic review and meta-analyses of randomised controlled trials and cohort studies. *BMJ* 2013;346:e7492.
5. World Health Organization. Sugars intake for adults and children. Geneva, Switzerland: World Health Organization, 2015.
6. Monteiro CA, Cannon G, Moubarac JC, Levy RB, Louzada ML, Jaime PC. The UN decade of nutrition, the NOVA food classification and the trouble with ultra-processing. *Public Health Nutr* 2018;21:5–17.
7. Martinez Steele E, Popkin BM, Swinburn B, Monteiro CA. The share of ultra-processed foods and the overall nutritional quality of diets in the US: evidence from a nationally representative cross-sectional study. *Popul Health Metr* 2017;15:6.
8. Moubarac JC, Batal M, Louzada ML, Martinez Steele E, Monteiro CA. Consumption of ultra-processed foods predicts diet quality in Canada. *Appetite* 2017;108:512-520.
9. Rauber F, da Costa Louzada ML, Steele EM, Millett C, Monteiro CA, Levy RB. Ultra-Processed Food Consumption and Chronic Non-Communicable Diseases-

- 1  
2  
3 Related Dietary Nutrient Profile in the UK (2008-2014). *Nutrients*. 2018;10(5)  
4 9;10(5), pii: E587.  
5  
6  
7 10. Martinez Steele E, Baraldi LG, Louzada ML, Moubarac JC, Mozaffarian D,  
8 Monteiro CA. Ultra-processed foods and added sugars in the US diet: evidence  
9 from a nationally representative cross-sectional study. *BMJ Open*  
10 2016;6(3):e009892.  
11  
12  
13 11. Louzada M, Ricardo CZ, Steele EM, Levy RB, Cannon G, Monteiro CA. The share  
14 of ultra-processed foods determines the overall nutritional quality of diets in  
15 Brazil. *Public Health Nutr* 2018;21(1):94-102.  
16  
17  
18 12. Cediel G, Reyes M, da Costa Louzada ML, Martinez Steele E, Monteiro CA,  
19 Corvalán C, Uauy R. Ultra-processed foods and added sugars in the Chilean diet  
20 (2010). *Public Health Nutr* 2018;21(1):125-133.  
21  
22  
23 13. Public Health England. National Diet and Nutrition Survey Results from years 7  
24 and 8 (Combined) of the Rolling Programme (2014/2015 to 2015/2016). London,  
25 UK: Public Health England, 2018.  
26  
27  
28 14. Department of Health and Social Care: Global Public Health Directorate: Obesity,  
29 Food and Nutrition. Childhood obesity: a plan for action, Chapter 2. London, UK:  
30 Department of Health and Social Care, 2018.  
31  
32  
33 15. Public Health England. National Diet and Nutrition Survey Results from Years 1,  
34 2, 3 and 4 (Combined) of the Rolling Programme (2008/2009–2011/2012).  
35 London, UK: Public Health England, 2014.  
36  
37  
38 16. Fitt E, Cole D, Ziauddeen N, Pell D, Stickley E, Harvey A, Stephen AM. DINO (Diet  
39 In Nutrients Out) - an integrated dietary assessment system. *Public Health Nutr*  
40 2015;18(2):234-241.  
41  
42  
43 17. Public Health England. McCance and Widdowson's the composition of foods  
44 integrated dataset 2015. London, UK: Public Health England, 2015.  
45  
46  
47 18. Monteiro CA, Cannon G, Levy RB, Moubarac JC, Jaime PC, Martins AP, Canella D,  
48 Louzada MLDC, Parra D. NOVA. The star shines bright. *World Nutrition* 2016;7(1-  
49 3):28-38.  
50  
51  
52  
53  
54  
55  
56  
57  
58  
59  
60

- 1  
2  
3 19. Fitt E, Mak TN, Stephen AM, Prynne C, Roberts C, Swan G, Farron-Wilson M.  
4 Disaggregating composite food codes in the UK National Diet and Nutrition  
5 Survey food composition databank. *Eur J Clin Nutr* 2010;64 Suppl 3:S32-36.  
6  
7
- 8  
9 20. White IR, Royston P, Wood AM. Multiple imputation using chained equations:  
10 Issues and guidance for practice. *Stat Med* 2011;30(4):377-399.  
11  
12
- 13 21. Nielsen SJ, Adair L. An alternative to dietary data exclusions. *J Am Diet Assoc*  
14 2007;107(5):792-799.  
15  
16
- 17 22. Steenland K, Armstrong B. An overview of methods for calculating the burden of  
18 disease due to specific risk factors. *Epidemiology*. 2006 Sep;17(5):512-9.  
19  
20
- 21 23. Rezende LFM, Eluf-Neto J. Population attributable fraction: planning of diseases  
22 prevention actions in Brazil. *Rev Saúde Pública* 2016;50:30.  
23  
24
- 25 24. Moodie R, Stuckler D, Monteiro CA, Sheron N, Neal B, Thamarangsi T, Lincoln P,  
26 Casswell S. Profits and pandemics: prevention of harmful effects of tobacco,  
27 alcohol, and ultra-processed food and drink industries. *Lancet*  
28 2013;381(9867):670-679.  
29  
30  
31  
32
- 33 25. Public Health England. First measure of industry progress to cut sugar unveiled  
34 [press release]. London, UK: Public Health England, 2018.  
35  
36
- 37 26. Food and Agriculture Organization of the United Nations. Guidelines on the  
38 collection of information on food processing through food consumption surveys.  
39 Rome, Italy: Food and Agriculture Organization of the United Nations, 2015.  
40  
41  
42
- 43 27. Pan American Health Organization. Ultra-processed Food and Drink Products in  
44 Latin America: Trends, Impact on Obesity, Policy Implications. Washington, DC:  
45 Pan American Health Organization, 2015.  
46  
47  
48
- 49 28. Public Health England. Dietary data collection and editing. In *National Diet and*  
50 *Nutrition Survey. Results from years 1–4 (combined) of the Rolling Programme*  
51 *(2008/2009–2011/2012)*. London, UK: Public Health England, 2014. Available  
52 online:  
53 [https://www.gov.uk/government/statistics/national-diet-](https://www.gov.uk/government/statistics/national-diet-and-nutrition-survey-results-from-years-1-to-4-combined-of-the-rolling-)  
54 [and-nutrition-survey-results-from-years-1-to-4-combined-of-the-rolling-](https://www.gov.uk/government/statistics/national-diet-and-nutrition-survey-results-from-years-1-to-4-combined-of-the-rolling-)  
55  
56  
57  
58  
59  
60

1  
2  
3 programme-for-2008-and-2009-to-2011-and-2012 (accessed on 15 January  
4  
5 2018).  
6  
7  
8  
9  
10  
11  
12  
13  
14  
15  
16  
17  
18  
19  
20  
21  
22  
23  
24  
25  
26  
27  
28  
29  
30  
31  
32  
33  
34  
35  
36  
37  
38  
39  
40  
41  
42  
43  
44  
45  
46  
47  
48  
49  
50  
51  
52  
53  
54  
55  
56  
57  
58  
59  
60

For peer review only



1  
2  
3 **Figure 1.** Percentage of excessive free sugar intake that would be avoided under two  
4 counterfactual scenarios regarding the consumption of the main dietary sources of free  
5 sugar. UK population aged 1.5 years or over (2008–14).  
6  
7  
8  
9  
10  
11  
12  
13  
14  
15  
16  
17  
18  
19  
20  
21  
22  
23  
24  
25  
26  
27  
28  
29  
30  
31  
32  
33  
34  
35  
36  
37  
38  
39  
40  
41  
42  
43  
44  
45  
46  
47  
48  
49  
50  
51  
52  
53  
54  
55  
56  
57  
58  
59  
60

For peer review only

Figure 1.



\*Including honey, molasses, maple syrup (100%).

1  
2  
3  
4 **Ultra-processed foods and excessive free sugar intake in the United Kingdom: a**  
5 **nationally representative cross-sectional study.**  
6  
7  
8

9 Fernanda Rauber <sup>1,2</sup>, Maria Laura da Costa Louzada <sup>1,3</sup>, Eurídice Martínez Steele <sup>1,2</sup>, Leandro  
10 Fórniás Machado de Rezende <sup>1,4</sup>, Christopher Millett <sup>1,5</sup>, Carlos Augusto Monteiro <sup>1,2</sup>, Renata  
11 Bertazzi Levy <sup>1,4</sup>  
12  
13  
14  
15

16 <sup>1</sup> Núcleo de Pesquisas Epidemiológicas em Nutrição e Saúde, Universidade de São Paulo, São  
17 Paulo, Brasil.

18 <sup>2</sup> Departamento de Nutrição, Faculdade de Saúde Pública, Universidade de São Paulo, São  
19 Paulo, Brasil.

20 <sup>3</sup> Departamento de Políticas Públicas e Saúde Coletiva, Universidade Federal de São Paulo,  
21 São Paulo, Brasil.

22 <sup>4</sup> Departamento de Medicina Preventiva, Faculdade de Medicina FMUSP, Universidade de  
23 São Paulo, São Paulo, Brasil.

24 <sup>5</sup> Public Health Policy Evaluation Unit, School of Public Health, Imperial College London,  
25 London W6 8RP, United Kingdom.  
26  
27  
28  
29  
30  
31  
32  
33  
34  
35  
36

37 **Corresponding author:** Fernanda Rauber, [rauber.fernanda@gmail.com](mailto:rauber.fernanda@gmail.com), Departamento de  
38 Nutrição, Faculdade de Saúde Pública, Universidade de São Paulo, Av. Dr. Arnaldo, 715, São  
39 Paulo 01246-904, Brasil.  
40  
41  
42  
43  
44  
45  
46  
47  
48  
49  
50  
51  
52  
53  
54  
55  
56  
57  
58  
59  
60

**Supplementary table S1. The Nova food classification system\***

| Food groups                                                                                                                                                                                                                                                                                                                                                                                                                                                                                                                                                                                                                                                                                                  | Examples                                                                                                                                                                                                                                                                                                                                                                                                                                                                                                                                                                                                                             |
|--------------------------------------------------------------------------------------------------------------------------------------------------------------------------------------------------------------------------------------------------------------------------------------------------------------------------------------------------------------------------------------------------------------------------------------------------------------------------------------------------------------------------------------------------------------------------------------------------------------------------------------------------------------------------------------------------------------|--------------------------------------------------------------------------------------------------------------------------------------------------------------------------------------------------------------------------------------------------------------------------------------------------------------------------------------------------------------------------------------------------------------------------------------------------------------------------------------------------------------------------------------------------------------------------------------------------------------------------------------|
| <p><b>1) Unprocessed foods or minimally processed foods</b></p> <p>Natural foods altered by methods such as freezing, pasteurization, fermentation, removal of inedible or unwanted parts, grinding, and other methods that do not include the addition of substances such as salt, sugar and/or oils or fats.</p>                                                                                                                                                                                                                                                                                                                                                                                           | <p>Fresh, dry or frozen fruits or vegetables; legumes; grains, roots and tubers, flours and pasta; pasteurized or power plain milk and plain yogurt; fresh or frozen meat (fish, poultry and red meat); eggs; nuts and seeds; fungi; fresh or pasteurised fruit or vegetable juices without added sugar, sweeteners or flavours; tea, coffee and drinking water.</p>                                                                                                                                                                                                                                                                 |
| <p><b>2) Processed culinary ingredients</b></p> <p>Substances obtained directly from group 1 foods or from nature by processes that include pressing, refining, grinding, milling, and drying, and consumed in combination with group 1 foods in freshly prepared dishes or drinks.</p>                                                                                                                                                                                                                                                                                                                                                                                                                      | <p>Salt; sugar, honey and molasses; vegetable oils; butter and lard; starches extracted from corn and other plants.</p>                                                                                                                                                                                                                                                                                                                                                                                                                                                                                                              |
| <p><b>3) Processed foods</b></p> <p>Products manufactured with the addition of group 2 substances (e.g. salt, sugar, oil, and fats) to group 1 foods and alcoholic drinks produced by fermentation of group 1 foods such as beer, cider and wine.</p>                                                                                                                                                                                                                                                                                                                                                                                                                                                        | <p>Canned or bottled vegetables, fruits and legumes; salted or sugared nuts and seeds; salted, cured, or smoked meats; canned fish; fruits in syrup; cheeses and unpackaged freshly made breads.</p>                                                                                                                                                                                                                                                                                                                                                                                                                                 |
| <p><b>4) Ultra-processed foods</b></p> <p>Food and drink formulations made from several ingredients. Such ingredients include salt, sugar, oils, and fats but also other substances derived from foods but not commonly used as culinary ingredients (such as protein isolates, hydrogenated oils, modified starches) and additives used to imitate sensory quality of natural foods and freshly prepared dishes or to disguise unpalatable aspects of the final product (such as flavours, colours, sweeteners, emulsifiers). Alcoholic drinks produced by fermentation of group 1 foods followed by distillation of the resulting alcohol, such as whisky, gin, rum, vodka, are classified in group 4.</p> | <p>Carbonated drinks; sweet or savoury packaged snacks; confectionery; mass-produced packaged breads and buns; margarines and spreads; biscuits, pastries, cakes, and cake mixes; breakfast 'cereals', 'cereal' and 'energy' bars; 'energy' drinks; milk drinks, 'fruit' yoghurts and 'fruit' drinks; cocoa drinks; meat and chicken extracts and 'instant' sauces; ready to heat products including pre-prepared pies and pasta and pizza dishes; poultry and fish 'nuggets' and 'sticks', sausages, burgers, hot dogs, and other reconstituted meat products, and powdered and packaged 'instant' soups, noodles and desserts.</p> |

Adapted from Monteiro et al. (2016 and 2018).

Monteiro CA, Cannon G, Moubarac JC et al. (2018) The UN Decade of Nutrition, the NOVA food classification and the trouble with ultra-processing. *Public Health Nutr* 21, 5-17.

Monteiro CA, Cannon G, Levy RB, et al. NOVA. The star shines bright. *World Nutrition*. 2016;7(1-3):28-38.

Supplementary Table S2. Coding of subsidiary food groups from National Diet and Nutrition Survey according to NOVA classification.

| Subsidiary food group code | Subsidiary food group name                               | NOVA food group† |
|----------------------------|----------------------------------------------------------|------------------|
| 1C                         | Pizza                                                    | 4                |
| 1D                         | Pasta (manufactured products and ready meals)            | 4                |
| 1E                         | Pasta (other, including homemade dishes)                 | *                |
| 1F                         | Rice (manufactured products and ready meals)             | 4                |
| 1G                         | Rice (other, including homemade dishes)                  | *                |
| 1R                         | Other cereals                                            | *                |
| 2R                         | White bread (not high fibre, not multiseed bread)        | 4                |
| 3R                         | Wholemeal bread                                          | 4                |
| 4R                         | Other bread                                              | 4                |
| 5R                         | High fibre breakfast cereals                             | 4                |
| 6R                         | Other breakfast cereals (not high fibre)                 | 4                |
| 7A                         | Biscuits(manufactured/retail)                            | 4                |
| 7B                         | Biscuits (homemade)                                      | *                |
| 8B                         | Fruit pies (manufactured)                                | 4                |
| 8C                         | Fruit pies (homemade)                                    | *                |
| 8D                         | Buns cakes and pastries (manufactured)                   | 4                |
| 8E                         | Buns cakes and pastries (homemade)                       | *                |
| 9C                         | Cereal based milk puddings (manufactured)                | 4                |
| 9D                         | Cereal based milk puddings (homemade)                    | *                |
| 9E                         | Sponge puddings (manufactured)                           | 4                |
| 9F                         | Sponge puddings (homemade)                               | *                |
| 9G                         | Other cereal based puddings (manufactured)               | 4                |
| 9H                         | Other cereal based puddings (homemade)                   | *                |
| 10R                        | Whole milk                                               | 1                |
| 11R                        | Semi-skimmed milk                                        | 1                |
| 12R                        | Skimmed milk                                             | 1                |
| 13A                        | Infant formula                                           | 4                |
| 13B                        | Cream (including imitation cream)                        | *                |
| 13R                        | Other milk                                               | *                |
| 14A                        | Cottage cheese                                           | 3                |
| 14B                        | Cheddar cheese                                           | 3                |
| 14R                        | Other cheese                                             | *                |
| 15B                        | Yogurt                                                   | *                |
| 15C                        | Fromage frais and other dairy desserts (manufactured)    | 4                |
| 15D                        | Dairy desserts (homemade)                                | *                |
| 16C                        | Manufactured egg products, including ready meals         | 4                |
| 16D                        | Other eggs and egg dishes, including homemade            | *                |
| 17R                        | Butter                                                   | 2                |
| 18A                        | Polyunsaturated margarine                                | 4                |
| 18B                        | Polyunsaturated oils                                     | 2                |
| 19A                        | Polyunsaturated low fat spread                           | 4                |
| 19R                        | Low fat spread not polyunsaturated                       | 4                |
| 20A                        | Block margarine                                          | 4                |
| 20B                        | Soft margarine not polyunsaturated                       | 4                |
| 20C                        | Other cooking fats and oils not polyunsaturated          | 2                |
| 21A                        | Reduced fat spread (polyunsaturated)                     | 4                |
| 21B                        | Reduced fat spread (not polyunsaturated)                 | 4                |
| 22A                        | Ready meals/meal centres based on bacon and ham          | 4                |
| 22B                        | Other bacon and ham (including homemade dishes)          | *                |
| 23A                        | Manufactured beef products (including ready meals)       | 4                |
| 23B                        | Other beef & veal (including homemade recipe dishes)     | *                |
| 24A                        | Manufactured lamb products (including ready meals)       | 4                |
| 24B                        | Other lamb (including homemade recipe dishes)            | *                |
| 25A                        | Manufactured pork products(including ready meals)        | 4                |
| 25B                        | Other pork (including homemade recipe dishes)            | *                |
| 26A                        | Manufactured coated chicken/turkey products              | 4                |
| 27A                        | Manufactured chicken products (including ready meals)    | 4                |
| 27B                        | Other chicken/turkey (including homemade recipe dishes)  | *                |
| 28R                        | Liver and dishes                                         | *                |
| 29R                        | Burgers and kebabs purchased                             | 4                |
| 30A                        | Ready meals based on sausages                            | 4                |
| 30B                        | Other sausages (including homemade dishes)               | *                |
| 31A                        | Meat pies and pastries (manufactured)                    | 4                |
| 31B                        | Meat pies and pastries (homemade)                        | *                |
| 32A                        | Other meat products (manufactured including ready meals) | 4                |
| 32B                        | Other meat (including homemade recipe dishes)            | *                |

1  
2  
3  
4  
5  
6  
7  
8  
9  
10  
11  
12  
13  
14  
15  
16  
17  
18  
19  
20  
21  
22  
23  
24  
25  
26  
27  
28  
29  
30  
31  
32  
33  
34  
35  
36  
37  
38  
39  
40  
41  
42  
43  
44  
45  
46  
47  
48  
49  
50  
51  
52  
53  
54  
55  
56  
57  
58  
59  
60

|     |                                                               |    |
|-----|---------------------------------------------------------------|----|
| 33R | White fish coated or fried                                    | *  |
| 34C | Manufactured white fish products (including ready meals)      | 4  |
| 34D | Other white fish (including homemade dishes)                  | *  |
| 34E | Manufactured shellfish products (including ready meals)       | 4  |
| 34F | Other shellfish (including homemade dishes)                   | *  |
| 34G | Manufactured canned tuna products (including ready meals)     | *  |
| 34H | Other canned tuna (including homemade dishes)                 | *  |
| 35A | Manufactured oily fish products (including ready meals)       | 4  |
| 35B | Other oily fish (including homemade dishes)                   | *  |
| 36A | Carrots (raw)                                                 | 1  |
| 36B | Salad and other raw vegetables                                | *  |
| 36C | Tomatoes raw                                                  | 1  |
| 37A | Peas not raw                                                  | *  |
| 37B | Green beans not raw                                           | *  |
| 37C | Baked beans                                                   | 4  |
| 37D | Leafy green vegetables not raw                                | *  |
| 37E | Carrots not raw                                               | *  |
| 37F | Tomatoes not raw                                              | *  |
| 37I | Beans and pulses (including ready meal & homemade dishes)     | *  |
| 37K | Meat alternatives (including ready meals and homemade dishes) | 4  |
| 37L | Other manufactured vegetable products (including ready meals) | 4  |
| 37M | Other vegetables (including homemade dishes)                  | *  |
| 38A | Chips purchased including takeaway                            | 4  |
| 38C | Other manufactured potato products fried/baked                | 4  |
| 38D | Other fried/roast potatoes (including homemade dishes)        | *  |
| 39A | Other potato products and dishes(manufactured)                | 4  |
| 39B | Other potatoes (including homemade dishes)                    | *  |
| 40A | Apples and pears not canned                                   | *  |
| 40B | Citrus fruit not canned                                       | *  |
| 40C | Bananas                                                       | *  |
| 40D | Canned fruit in juice                                         | *  |
| 40E | Canned fruit in syrup                                         | 3  |
| 40R | Other fruit not canned                                        | *  |
| 41A | Sugar                                                         | *  |
| 41B | Preserves                                                     | 3  |
| 41R | Sweet spreads fillings and icing                              | 4  |
| 42R | Crisps and savoury snacks                                     | 4  |
| 43R | Sugar confectionery                                           | 4  |
| 44R | Chocolate confectionery                                       | 4  |
| 45R | Fruit juice                                                   | *  |
| 47A | Liqueurs                                                      | 4  |
| 47B | Spirits                                                       | 4  |
| 48A | Wine                                                          | 3  |
| 48B | Fortified wine                                                | 4  |
| 48C | Low alcohol and alcohol free wine                             | 3  |
| 49A | Beers and lagers                                              | 3  |
| 49B | Low alcohol & alcohol free beer & lager                       | 3  |
| 49C | Cider and Perry                                               | 4  |
| 49D | Low alcohol & alcohol free cider & Perry                      | 4  |
| 49E | Alcoholic soft drinks (Alcopops)                              | 4  |
| 50A | Beverages dry weight                                          | 4  |
| 50C | Soup (manufactured/retail)                                    | 4  |
| 50D | Soup (homemade)                                               | *  |
| 50E | Nutrition powders and drinks                                  | 4  |
| 50R | Savoury sauces pickles gravies & condiments                   | 4  |
| 51A | Coffee (made up weight)                                       | *  |
| 51B | Tea (made up)                                                 | *  |
| 51C | Herbal tea (made up)                                          | 1  |
| 51D | Bottled water still or carbonated                             | *  |
| 51R | Tap water only                                                | 1  |
| 52A | Commercial toddlers drinks                                    | 3  |
| 52R | Commercial toddlers foods                                     | 3  |
| 53R | Ice cream                                                     | 4  |
| 54A | Cod liver oil and other fish oils                             | ** |
| 54B | Evening primrose oil and other plant oils                     | ** |
| 54C | Single vitamins/minerals not Folic acid, iron, calcium        | ** |
| 54D | Folic acid                                                    | ** |
| 54E | Iron only or with vitamin C                                   | ** |
| 54F | Calcium only or with vitamin D                                | ** |
| 54G | Vitamins (two or more including multivitamins) no minerals    | ** |
| 54H | Minerals (two or more including multimineral) no vitamins     | ** |
| 54I | Vitamins and minerals (including multivitamins & minerals)    | ** |
| 54J | Non-nutrient supplements (including herbal)                   | ** |

|     |                                                                     |    |
|-----|---------------------------------------------------------------------|----|
| 54K | Other nutrient supplements                                          | ** |
| 54L | Vitamin C                                                           | ** |
| 54M | Single vitamins/minerals not Folic acid, iron, calcium or vitamin C | ** |
| 54N | Cod liver oil and other fish oils (including with vitamins A, D, E) | ** |
| 54P | Multivitamins and/or minerals with omega ultra-processed            | ** |
| 55R | Artificial sweeteners                                               | 4  |
| 56R | Nuts and seeds                                                      | *  |
| 57A | Soft drinks not low calorie concentrated                            | 4  |
| 57B | Soft drinks not low calorie carbonated                              | 4  |
| 57C | Soft drinks not low calorie, ready to drink, still                  | 4  |
| 58A | Soft drinks low calorie concentrated                                | 4  |
| 58B | Soft drinks low calorie carbonated                                  | 4  |
| 58C | Soft drinks low calorie, ready to drink, still                      | 4  |
| 59R | Brown, granary and wheat germ bread                                 | 4  |
| 60R | 1% Milk                                                             | 1  |
| 61R | Smoothies                                                           | 1  |

† NOVA food groups defined as 1) unprocessed or minimally processed foods; 2) processed culinary ingredients; 3) processed foods; and 4) ultra-processed foods.

\* All foods within this subsidiary food group were individually coded (by food name).

\*\* Supplements were not included in any of the NOVA food groups.

Source: Rauber F, Louzada MLC, Steele EM, Millett C, Monteiro CA, Levy RB. Ultra-Processed Food Consumption and Chronic Non-Communicable Diseases-Related Dietary Nutrient Profile in the UK (2008–2014). *Nutrients* 2018, 10, 587; doi:10.3390/nu10050587.

**Supplementary table S3. Dietary content in free sugars according to age groups. UK population aged 1.5 years or over (2008–14).**

| Age groups            | % of total energy intake from free sugars |             | Individuals with $\geq 5\%$ of total energy intake from free sugars |              |              |
|-----------------------|-------------------------------------------|-------------|---------------------------------------------------------------------|--------------|--------------|
|                       | mean                                      | SE          | %                                                                   | 95%CI        |              |
| 1.5 - 10 years        | 14.00                                     | 0.14        | 97.16                                                               | 96.29        | 97.84        |
| 11 - 18 years         | 15.78                                     | 0.19        | 96.77                                                               | 95.62        | 97.62        |
| 19 - 64 years         | 11.93                                     | 0.14        | 88.82                                                               | 87.48        | 90.04        |
| $\geq 65$ years       | 11.36                                     | 0.23        | 87.62                                                               | 84.88        | 89.93        |
| <b>All age groups</b> | <b>12.44</b>                              | <b>0.10</b> | <b>90.34</b>                                                        | <b>89.39</b> | <b>91.21</b> |



Supplementary table S4. Indicators of the dietary content in free sugars according to quintiles of the dietary contribution of NOVA food groups in the UK population aged 1.5 years or over (2008-14).

| Dietary contribution (% of total energy intake)                                  |       |       |        | % of total energy intake from free sugars |      | Individuals with ≥5% of total energy intake from free sugars |                   |                    |       |      | Individuals with ≥10% of total energy intake from free sugars |                   |                    |       |      |
|----------------------------------------------------------------------------------|-------|-------|--------|-------------------------------------------|------|--------------------------------------------------------------|-------------------|--------------------|-------|------|---------------------------------------------------------------|-------------------|--------------------|-------|------|
| Quintile                                                                         | mean  | min   | max    | mean                                      | SE   | %                                                            | PR*               | PRadj <sup>†</sup> | 95%CI |      | %                                                             | PR*               | PRadj <sup>†</sup> | 95%CI |      |
| <b>Unprocessed or minimally processed foods + Processed culinary ingredients</b> |       |       |        |                                           |      |                                                              |                   |                    |       |      |                                                               |                   |                    |       |      |
| 1st                                                                              | 15.10 | 0.00  | 20.92  | 15.36                                     | 0.24 | 95.94                                                        | 1.00              | 1.00               | —     | —    | 77.42                                                         | 1.00              | 1.00               | —     | —    |
| 2nd                                                                              | 24.90 | 20.92 | 28.43  | 13.44                                     | 0.22 | 94.28                                                        | 0.98              | 0.99               | 0.97  | 1.01 | 68.55                                                         | 0.89              | 0.92               | 0.86  | 0.97 |
| 3rd                                                                              | 31.68 | 28.43 | 34.96  | 12.62                                     | 0.21 | 91.92                                                        | 0.96              | 0.97               | 0.95  | 1.00 | 65.09                                                         | 0.84              | 0.89               | 0.84  | 0.95 |
| 4th                                                                              | 39.08 | 34.97 | 43.88  | 11.46                                     | 0.21 | 89.70                                                        | 0.93              | 0.96               | 0.93  | 0.98 | 55.09                                                         | 0.71              | 0.77               | 0.72  | 0.83 |
| 5th                                                                              | 53.57 | 43.88 | 91.90  | 10.32 <sup>‡</sup>                        | 0.19 | 82.41                                                        | 0.86              | 0.89               | 0.86  | 0.92 | 46.36                                                         | 0.60 <sup>‡</sup> | 0.67 <sup>‡</sup>  | 0.61  | 0.73 |
| <b>Processed foods</b>                                                           |       |       |        |                                           |      |                                                              |                   |                    |       |      |                                                               |                   |                    |       |      |
| 1st                                                                              | 0.32  | 0.00  | 1.33   | 13.53                                     | 0.29 | 87.19                                                        | 1.00              | 1.00               | —     | —    | 64.14                                                         | 1.00              | 1.00               | —     | —    |
| 2nd                                                                              | 2.55  | 1.34  | 3.79   | 13.48                                     | 0.24 | 92.34                                                        | 1.06              | 1.06               | 1.03  | 1.10 | 67.93                                                         | 1.06              | 1.08               | 1.01  | 1.16 |
| 3rd                                                                              | 5.28  | 3.79  | 6.82   | 12.83                                     | 0.19 | 92.39                                                        | 1.06              | 1.07               | 1.03  | 1.10 | 67.10                                                         | 1.05              | 1.08               | 1.00  | 1.16 |
| 4th                                                                              | 9.28  | 6.82  | 12.03  | 11.89                                     | 0.20 | 90.61                                                        | 1.04              | 1.06               | 1.02  | 1.09 | 58.87                                                         | 0.92              | 0.98               | 0.91  | 1.06 |
| 5th                                                                              | 19.54 | 12.04 | 65.22  | 11.38 <sup>‡</sup>                        | 0.19 | 89.40                                                        | 1.03              | 1.04               | 1.01  | 1.08 | 53.70                                                         | 0.84 <sup>‡</sup> | 0.91 <sup>‡</sup>  | 0.84  | 0.98 |
| <b>Ultra-processed foods</b>                                                     |       |       |        |                                           |      |                                                              |                   |                    |       |      |                                                               |                   |                    |       |      |
| 1st                                                                              | 34.89 | 1.82  | 43.69  | 9.94                                      | 0.22 | 80.50                                                        | 1.00              | 1.00               | —     | —    | 41.87                                                         | 1.00              | 1.00               | —     | —    |
| 2nd                                                                              | 48.74 | 43.69 | 53.04  | 11.34                                     | 0.20 | 89.16                                                        | 1.11              | 1.10               | 1.05  | 1.15 | 56.35                                                         | 1.35              | 1.31               | 1.18  | 1.46 |
| 3rd                                                                              | 57.06 | 53.05 | 60.96  | 12.16                                     | 0.21 | 92.65                                                        | 1.15              | 1.14               | 1.09  | 1.18 | 60.76                                                         | 1.45              | 1.39               | 1.25  | 1.54 |
| 4th                                                                              | 65.37 | 60.96 | 70.14  | 13.38                                     | 0.21 | 94.08                                                        | 1.17              | 1.15               | 1.10  | 1.19 | 70.18                                                         | 1.68              | 1.55               | 1.41  | 1.72 |
| 5th                                                                              | 78.06 | 70.14 | 100.00 | 15.41 <sup>‡</sup>                        | 0.21 | 95.30                                                        | 1.18 <sup>‡</sup> | 1.15 <sup>‡</sup>  | 1.10  | 1.19 | 77.20                                                         | 1.84 <sup>‡</sup> | 1.64 <sup>‡</sup>  | 1.48  | 1.81 |

\*PR=Prevalence ratios estimated using Poisson regression.

<sup>†</sup>PRadj=Prevalence ratios adjusted for sex, age, race/ethnicity (White, Mixed ethnic group, Black or Black British, Asian or Asian British and Other race), region, survey year, and household income.

<sup>‡</sup>Significant linear trend across all quintiles (p≤0.001).

STROBE Statement—Checklist of items that should be included in reports of *cross-sectional studies*

|                              | Item No | Recommendation                                                                                                                                                                                               | Page No |
|------------------------------|---------|--------------------------------------------------------------------------------------------------------------------------------------------------------------------------------------------------------------|---------|
| <b>Title and abstract</b>    | 1       | (a) Indicate the study's design with a commonly used term in the title or the abstract                                                                                                                       | 1, 2    |
|                              |         | (b) Provide in the abstract an informative and balanced summary of what was done and what was found                                                                                                          | 1, 2    |
| <b>Introduction</b>          |         |                                                                                                                                                                                                              |         |
| Background/rationale         | 2       | Explain the scientific background and rationale for the investigation being reported                                                                                                                         | 4       |
| Objectives                   | 3       | State specific objectives, including any prespecified hypotheses                                                                                                                                             | 4, 5    |
| <b>Methods</b>               |         |                                                                                                                                                                                                              |         |
| Study design                 | 4       | Present key elements of study design early in the paper                                                                                                                                                      | 5       |
| Setting                      | 5       | Describe the setting, locations, and relevant dates, including periods of recruitment, exposure, follow-up, and data collection                                                                              | 5       |
| Participants                 | 6       | (a) Give the eligibility criteria, and the sources and methods of selection of participants                                                                                                                  | 5       |
| Variables                    | 7       | Clearly define all outcomes, exposures, predictors, potential confounders, and effect modifiers. Give diagnostic criteria, if applicable                                                                     | 6-9     |
| Data sources/<br>measurement | 8*      | For each variable of interest, give sources of data and details of methods of assessment (measurement). Describe comparability of assessment methods if there is more than one group                         | 6-9     |
| Bias                         | 9       | Describe any efforts to address potential sources of bias                                                                                                                                                    | 6,7,9   |
| Study size                   | 10      | Explain how the study size was arrived at                                                                                                                                                                    | 5       |
| Quantitative variables       | 11      | Explain how quantitative variables were handled in the analyses. If applicable, describe which groupings were chosen and why                                                                                 | 7,8     |
| Statistical methods          | 12      | (a) Describe all statistical methods, including those used to control for confounding                                                                                                                        | 8-9     |
|                              |         | (b) Describe any methods used to examine subgroups and interactions                                                                                                                                          | 8,9     |
|                              |         | (c) Explain how missing data were addressed                                                                                                                                                                  | 8       |
|                              |         | (d) If applicable, describe analytical methods taking account of sampling strategy                                                                                                                           | 9       |
|                              |         | (e) Describe any sensitivity analyses                                                                                                                                                                        | NA      |
| <b>Results</b>               |         |                                                                                                                                                                                                              |         |
| Participants                 | 13*     | (a) Report numbers of individuals at each stage of study—eg numbers potentially eligible, examined for eligibility, confirmed eligible, included in the study, completing follow-up, and analysed            | 8       |
|                              |         | (b) Give reasons for non-participation at each stage                                                                                                                                                         | NA      |
|                              |         | (c) Consider use of a flow diagram                                                                                                                                                                           | NA      |
| Descriptive data             | 14*     | (a) Give characteristics of study participants (eg demographic, clinical, social) and information on exposures and potential confounders                                                                     | NA      |
|                              |         | (b) Indicate number of participants with missing data for each variable of interest                                                                                                                          | 8       |
| Outcome data                 | 15*     | Report numbers of outcome events or summary measures                                                                                                                                                         | 10      |
| Main results                 | 16      | (a) Give unadjusted estimates and, if applicable, confounder-adjusted estimates and their precision (eg, 95% confidence interval). Make clear which confounders were adjusted for and why they were included | 12-16   |

|                          |    |                                                                                                                                                                            |       |
|--------------------------|----|----------------------------------------------------------------------------------------------------------------------------------------------------------------------------|-------|
|                          |    | (b) Report category boundaries when continuous variables were categorized                                                                                                  |       |
|                          |    | (c) If relevant, consider translating estimates of relative risk into absolute risk for a meaningful time period                                                           | NA    |
| Other analyses           | 17 | Report other analyses done—eg analyses of subgroups and interactions, and sensitivity analyses                                                                             | 12    |
| <b>Discussion</b>        |    |                                                                                                                                                                            |       |
| Key results              | 18 | Summarise key results with reference to study objectives                                                                                                                   | 17    |
| Limitations              | 19 | Discuss limitations of the study, taking into account sources of potential bias or imprecision. Discuss both direction and magnitude of any potential bias                 | 18,19 |
| Interpretation           | 20 | Give a cautious overall interpretation of results considering objectives, limitations, multiplicity of analyses, results from similar studies, and other relevant evidence | 19    |
| Generalisability         | 21 | Discuss the generalisability (external validity) of the study results                                                                                                      | 17,18 |
| <b>Other information</b> |    |                                                                                                                                                                            |       |
| Funding                  | 22 | Give the source of funding and the role of the funders for the present study and, if applicable, for the original study on which the present article is based              | 20    |

\*Give information separately for exposed and unexposed groups.

**Note:** An Explanation and Elaboration article discusses each checklist item and gives methodological background and published examples of transparent reporting. The STROBE checklist is best used in conjunction with this article (freely available on the Web sites of PLoS Medicine at <http://www.plosmedicine.org/>, Annals of Internal Medicine at <http://www.annals.org/>, and Epidemiology at <http://www.epidem.com/>). Information on the STROBE Initiative is available at [www.strobe-statement.org](http://www.strobe-statement.org).

# BMJ Open

## Ultra-processed foods and excessive free sugar intake in the United Kingdom: a nationally representative cross-sectional study

|                                 |                                                                                                                                                                                                                                                                                                                                                                                                                                                                                                                                                                                                                                                                                                                                                                                                                                                                                                                                                                                                                                                                                                                                                                                                                                                                                                               |
|---------------------------------|---------------------------------------------------------------------------------------------------------------------------------------------------------------------------------------------------------------------------------------------------------------------------------------------------------------------------------------------------------------------------------------------------------------------------------------------------------------------------------------------------------------------------------------------------------------------------------------------------------------------------------------------------------------------------------------------------------------------------------------------------------------------------------------------------------------------------------------------------------------------------------------------------------------------------------------------------------------------------------------------------------------------------------------------------------------------------------------------------------------------------------------------------------------------------------------------------------------------------------------------------------------------------------------------------------------|
| Journal:                        | <i>BMJ Open</i>                                                                                                                                                                                                                                                                                                                                                                                                                                                                                                                                                                                                                                                                                                                                                                                                                                                                                                                                                                                                                                                                                                                                                                                                                                                                                               |
| Manuscript ID                   | bmjopen-2018-027546.R3                                                                                                                                                                                                                                                                                                                                                                                                                                                                                                                                                                                                                                                                                                                                                                                                                                                                                                                                                                                                                                                                                                                                                                                                                                                                                        |
| Article Type:                   | Original research                                                                                                                                                                                                                                                                                                                                                                                                                                                                                                                                                                                                                                                                                                                                                                                                                                                                                                                                                                                                                                                                                                                                                                                                                                                                                             |
| Date Submitted by the Author:   | 06-Sep-2019                                                                                                                                                                                                                                                                                                                                                                                                                                                                                                                                                                                                                                                                                                                                                                                                                                                                                                                                                                                                                                                                                                                                                                                                                                                                                                   |
| Complete List of Authors:       | Rauber, Fernanda; Universidade de Sao Paulo, Departamento de Nutrição; Universidade de Sao Paulo, Núcleo de Pesquisas Epidemiológicas em Nutrição e Saúde<br>Louzada, Maria Laura; Universidade Federal de Sao Paulo, Departamento de Políticas Públicas e Saúde Coletiva; Universidade de Sao Paulo, Núcleo de Pesquisas Epidemiológicas em Nutrição e Saúde<br>Martinez Steele, Euridice; Universidade de Sao Paulo, Departamento de Nutrição; Universidade de Sao Paulo, Núcleo de Pesquisas Epidemiológicas em Nutrição e Saúde<br>Rezende, Leandro; Universidade Federal de São Paulo, Escola Paulista de Medicina. Departamento de Medicina Preventiva; Universidade de Sao Paulo, Núcleo de Pesquisas Epidemiológicas em Nutrição e Saúde<br>Millett, Christopher; Imperial College London, Public Health Policy Evaluation Unit, School of Public Health; Universidade de Sao Paulo, Núcleo de Pesquisas Epidemiológicas em Nutrição e Saúde<br>Monteiro, Carlos; Universidade de Sao Paulo, Departamento de Nutrição; Universidade de Sao Paulo, Núcleo de Pesquisas Epidemiológicas em Nutrição e Saúde<br>Levy, Renata; Universidade de Sao Paulo, Departamento de Medicina Preventiva, Faculdade de Medicina ; Universidade de Sao Paulo, Núcleo de Pesquisas Epidemiológicas em Nutrição e Saúde |
| <b>Primary Subject Heading</b>: | Public health                                                                                                                                                                                                                                                                                                                                                                                                                                                                                                                                                                                                                                                                                                                                                                                                                                                                                                                                                                                                                                                                                                                                                                                                                                                                                                 |
| Secondary Subject Heading:      | Epidemiology, Nutrition and metabolism                                                                                                                                                                                                                                                                                                                                                                                                                                                                                                                                                                                                                                                                                                                                                                                                                                                                                                                                                                                                                                                                                                                                                                                                                                                                        |
| Keywords:                       | Food processing, Ultra-processed, Free sugar, United Kingdom                                                                                                                                                                                                                                                                                                                                                                                                                                                                                                                                                                                                                                                                                                                                                                                                                                                                                                                                                                                                                                                                                                                                                                                                                                                  |
|                                 |                                                                                                                                                                                                                                                                                                                                                                                                                                                                                                                                                                                                                                                                                                                                                                                                                                                                                                                                                                                                                                                                                                                                                                                                                                                                                                               |

SCHOLARONE™  
Manuscripts

1  
2  
3 **Ultra-processed foods and excessive free sugar intake in the United Kingdom: a**  
4 **nationally representative cross-sectional study**  
5  
6

7 Fernanda Rauber <sup>1,2</sup>, Maria Laura da Costa Louzada <sup>1,3</sup>, Eurídice Martínez Steele <sup>1,2</sup>,  
8 Leandro Fórniás Machado de Rezende <sup>1,4</sup>, Christopher Millett <sup>1,5</sup>, Carlos Augusto  
9 Monteiro <sup>1,2</sup>, Renata Bertazzi Levy <sup>1,6</sup>  
10  
11  
12  
13

14  
15 <sup>1</sup> Núcleo de Pesquisas Epidemiológicas em Nutrição e Saúde, Universidade de São  
16 Paulo, São Paulo, Brasil.

17  
18 <sup>2</sup> Departamento de Nutrição, Faculdade de Saúde Pública, Universidade de São Paulo,  
19 São Paulo, Brasil.

20  
21  
22 <sup>3</sup> Departamento de Políticas Públicas e Saúde Coletiva, Universidade Federal de São  
23 Paulo, São Paulo, Brasil.

24  
25  
26 <sup>4</sup> Universidade Federal de São Paulo. Escola Paulista de Medicina. Departamento de  
27 Medicina Preventiva. São Paulo - SP, Brasil.

28  
29  
30 <sup>5</sup> Public Health Policy Evaluation Unit, School of Public Health, Imperial College London,  
31 London, United Kingdom.

32  
33  
34 <sup>6</sup> Departamento de Medicina Preventiva, Faculdade de Medicina FMUSP, Universidade  
35 de São Paulo, São Paulo, Brasil.

36  
37  
38  
39  
40 **Corresponding author:** Fernanda Rauber, [rauber.fernanda@gmail.com](mailto:rauber.fernanda@gmail.com), Departamento  
41 de Nutrição, Faculdade de Saúde Pública, Universidade de São Paulo, Av. Dr. Arnaldo,  
42 715, São Paulo 01246-904, Brasil.  
43  
44  
45

46  
47 **Word count:** 3,877  
48  
49  
50  
51  
52  
53  
54  
55  
56  
57  
58  
59  
60

## ABSTRACT

**Objectives:** to describe dietary sources of free sugars in different age groups of the UK population considering food groups classified according to the NOVA system and to estimate the proportion of excessive free sugars that could potentially be avoided by reducing consumption of their main sources.

**Design and setting:** Cross-sectional data from the UK National Diet and Nutrition Survey (2008–14) were analysed. Food items collected using a four-day food diary were classified according to the NOVA system.

**Participants:** 9,364 individuals aged 1.5 years and above.

**Main outcome measures:** Average dietary content of free sugars and proportion of individuals consuming more than 10% of total energy from free sugars.

**Data analysis:** Poisson regression was used to estimate the associations between each of the NOVA food group and intake of free sugars. We estimated the percent reduction in prevalence of excessive free sugar intake from eliminating ultra-processed foods and table sugar. Analyses were stratified by age group and adjusted for age, sex, ethnicity, region, and equivalised household income (sterling pounds).

**Results:** Ultra-processed foods account for 56.8% of total energy intake and 64.7% of total free sugars in the UK diet. Free sugars represent 12.4% of total energy intake and 61.3% of the sample exceeded the recommended limit of 10% energy from free sugars. This percentage was higher among children (74.9%) and adolescents (82.9%). Prevalence of excessive free sugar intake increased linearly across quintiles of ultra-processed food consumption for all age groups, except among the elderly. Eliminating ultra-processed foods could potentially reduce the prevalence of excessive free sugar intake by 47%.

**Conclusion:** Our findings suggest that actions to reduce the ultra-processed food consumption generally rich in free sugars could lead to substantial public health benefits.

**Keywords:** Food processing; Ultra-processed; Free sugar; United Kingdom.

## ARTICLE SUMMARY

### Strengths and limitations of this study

- Use of a large and nationally representative sample of the UK population, increasing generalisability.
- Use of data on free sugars rather than total sugars or sugar-sweetened beverages, which correspond to the guidelines relevant area of prioritisation.
- Use of NOVA system, which has been recognised as a valid tool for public health and nutrition research and policy by international organizations.
- Dietary data obtained by food diaries are subject to potential error and bias.
- UK national dietary survey collects limited information indicative of food processing (for example, place of meals and product brands), which may lead to misclassification of food items.

## INTRODUCTION

Excessive consumption of free sugar is associated with obesity, type 2 diabetes, dental caries, and several other health outcomes [1-4]. To address this associated health burden, the World Health Organization (WHO) [5] recommends that free sugars should be reduced to less than 10% of total energy intake and also suggests a level below 5% to obtain additional health benefits, such as reduction of dental caries. Achievement of this ambitious target will require bold and systematic efforts to reduce sugar across a variety of food products in most settings.

As defined by the NOVA food classification system, ultra-processed foods are industrial formulations of many ingredients, mostly of exclusive industrial use, that result from a sequence of industrial processes (hence ultra-processed) [6]. In some high-income countries, including the UK, ultra-processed foods account for more than half of total dietary energy intake [7-9]. Importantly, national dietary surveys conducted in high- and middle-income countries [8-12] have shown a strong and positive association between consumption of ultra-processed foods and excessive dietary added (or free) sugar intake. Free sugars include sugars added to foods by the manufacturer, cook and consumer, plus sugars naturally present in honey, syrups and fruit juices [5], while added sugars captures all free sugars, but exclude naturally occurring sugars in fruit juices.

Free sugar intake in the UK is high, ranging from 11 to 15% of total energy intake [13]. To address this, the UK has implemented a number of measures including a sugar-sweetened beverage levy in 2018. However, action on sugar sweetened beverages alone is unlikely to reduce population level sugar intake to WHO recommended levels. In a more recent publication, the voluntary sugar reduction programme continues being endorsed by the government, but other measures such as restriction of advertising and in-store promotions of some sugary foods are also being considered as strategies to reduce childhood obesity [14]. A better understanding of the key sources of sugar intake in the UK diet is required to inform policy development. This study aims to describe the dietary sources of free sugars in different age groups of the UK population taking into account food groups classified according



1  
2  
3 to the NOVA classification system and estimate the proportion of excessive free sugars  
4 that could be potentially avoided by reducing the consumption of their main dietary  
5 sources.  
6  
7  
8  
9

## 10 11 **METHODS**

### 12 13 14 15 16 **Data source and collection**

17  
18  
19  
20  
21 We used data from the National Diet and Nutrition Survey Rolling Programme  
22 (NDNS) years 1-6 (2008/09-2009/10, 2010/11-2011/12, 2012/13-2013/14) combined,  
23 which is a cross-sectional survey of people aged 1.5 years or older. The survey was  
24 designed to be representative of the UK population and provides comprehensive  
25 information on food intake. Details of the rationale, design, and methods of the survey  
26 have been described elsewhere [15]. Briefly, the sample was drawn from households  
27 randomly selected from the UK Postcode Address File, a list of all UK addresses. One  
28 adult (aged 19 years and older) and one child (aged 1.5–18 years), if available, were  
29 randomly selected from each household. Only a child was selected from some  
30 households to be part of a 'child boost' to ensure approximately equal numbers of  
31 children and adults. Participants (or in the case of children  $\leq 11$  years, their  
32 parent/carer) completed a four-day food diary and participated in an interview that  
33 included data on socio-demographic status.  
34  
35  
36  
37  
38  
39  
40  
41  
42  
43  
44

45 Participants were asked to report all foods and drinks consumed both within and  
46 outside the home. Portion sizes were estimated using household measures or weights  
47 from packaging. Once completed, diaries were checked by interviewers with  
48 respondents and missing details added to improve completeness. Diary days were  
49 randomly selected to ensure balanced representation of all days of the week. All  
50 individuals who completed three or four days of dietary recording were eligible for  
51 inclusion in the study, giving a sample size of 9,374 (4,738 adults and 4,636 children)  
52 participants for years 1 to 6 (2008/09 to 2013/14) combined.  
53  
54  
55  
56  
57  
58  
59  
60

1  
2  
3 The food intake data from completed records were coded and edited using the  
4 software DINO (Diet In, Nutrients Out) and food and nutrient intakes estimated using  
5 nutrient composition data from the Department of Health's Nutrient Databank,  
6 updated for each survey year [16, 17]. Free sugars are defined as sugars added to  
7 foods by the manufacturer, cook or consumer, plus sugars naturally present in honey,  
8 syrups, fruit juices and fruit concentrates [5]. Intakes in the UK NDNS years 1-6 were  
9 expressed as non-milk extrinsic sugars (NMES). The term NMES captures all sugars  
10 defined by the term free sugars while also including half of the sugars present in dried,  
11 stewed or canned fruit. The NMES values could be slightly higher in some cases than  
12 the free sugar values, mostly in the non-ultra-processed food group since the term free  
13 sugar does not include sugars contributed by dried and processed fruits. Based on the  
14 assumption that those definitions are sufficiently similar for assessment and  
15 monitoring purposes [1,3], this study used the term free sugars.  
16  
17  
18  
19  
20  
21  
22  
23  
24  
25  
26

27 Computerized raw data files and documentation from this survey were obtained  
28 under license from the UK Data Archive (<http://www.esds.ac.uk>). All relevant research  
29 ethics and governance committees approved the survey.  
30  
31  
32  
33  
34  
35

### 36 **Food classification according to processing**

37  
38  
39

40 We classified all recorded food items according to NOVA, a food classification  
41 system based on the nature, extent, and purpose of the industrial food processing [6].  
42 This classification includes four groups: 1) unprocessed or minimally processed foods  
43 (e.g. fresh, dry or frozen fruits or vegetables; grains, flours and pasta; pasteurized or  
44 power plain milk, plain yogurt, fresh or frozen meat); 2) processed culinary ingredients  
45 (e.g. table sugar, oils, butter, and salt); 3) processed foods (e.g. vegetables in brine,  
46 cheese, simple breads, fruits in syrup, canned fish); and 4) ultra-processed foods (e.g.  
47 soft drinks, sweet or savoury packaged snacks, confectionery; packaged breads and  
48 buns; reconstituted meat products and pre-prepared frozen or shelf-stable dishes) (**see**  
49 **Suppl. Table S1**). The detailed description of NOVA classification can be found  
50 elsewhere [6, 18].  
51  
52  
53  
54  
55  
56  
57  
58  
59  
60

1  
2  
3 All foods in NDNS are coded as food number and grouped into subsidiary food  
4 groups (n = 155). When possible, subsidiary food groups were directly classified  
5 according to NOVA (see **Suppl. Table S2**). When foods within a subsidiary food group  
6 pertained to different NOVA groups (n = 52), it was the food codes instead of the  
7 group, which were individually classified. By doing so, we were able to classify each  
8 underlying ingredient of homemade dishes in its corresponding NOVA group.  
9 Subsidiary food groups as classified by NOVA are described in the Supplementary Table  
10 S2.  
11  
12  
13  
14  
15  
16  
17

18 Although the NDNS database was provided with most food items systematically  
19 disaggregated into their individual components, about 4% of composite food codes  
20 were still mixed dishes compiled from two or more single-ingredient food code [19].  
21 The method we adopted to disaggregate food codes has been described previously  
22 [19]. Using the core sample of years 1 to 4 (2008/09 to 2011/12) (n = 4,125), we  
23 estimated that composite food codes represented only 3% of total calories. In this  
24 case, dishes were categorised according to the main constituent ingredient. Dishes in  
25 which a main constituent ingredient was not clearly identified (e.g. chicken and  
26 vegetable soup) were classified as a specific subgroup of freshly prepared dishes based  
27 on one or more unprocessed or minimally processed food (group 1). Non-caloric  
28 supplements were not included in the analyses.  
29  
30  
31  
32  
33  
34  
35  
36  
37  
38  
39  
40

## 41 **Covariates**

42  
43  
44  
45 Covariates included were age (years), sex, ethnicity (White, Mixed ethnic group,  
46 Black or Black British, Asian or Asian British and Other race), region (England North,  
47 England Central/Midlands, England South (including London), Scotland, Wales, and  
48 Northern Ireland), survey year (years 1-6), and equivalised household income  
49 (equivalised for different household sizes and composition using the McClements  
50 equivalence scale [15]). Due to the significant proportion of missing values for the  
51 equivalised household income (12.8%), we applied multiple imputation by chained  
52 equation method based on age, sex, ethnicity, excessive free sugars intake and ultra-  
53  
54  
55  
56  
57  
58  
59  
60

1  
2  
3 processed food consumption. Multiple imputation was performed 20 times, and the  
4 Monte Carlo error analysis showed good statistical reproducibility of the results [20].  
5 We used the average of estimates from each imputed dataset. Sensitivity analysis was  
6 conducted comparing findings from imputed data and complete case analysis.  
7  
8  
9

### 10 11 12 13 **Data analysis** 14 15 16

17  
18 For each survey day and age group (1.5 – 10 years, 11 – 18 years, 19 – 64 years,  
19 and ≥64 years), we defined extreme total energy intake outliers as values below the 1<sup>st</sup>  
20 and above the 99th percentiles [21] (**see Suppl. Figure S1**). Based on these criteria, we  
21 excluded ten individuals who had all days of food diary classified as outliers. In total,  
22 9,364 (4,729 adults and 4,635 children) participants were eligible for inclusion in the  
23 analyses and more than 91% completed the four food diary days. We used the mean of  
24 all available days of food diary for each individual.  
25  
26  
27  
28  
29

30  
31 Food items were sorted into mutually exclusive food groups according to NOVA  
32 classification. We combined the group of unprocessed or minimally processed foods  
33 with the group of processed culinary ingredients, as foods belonging to these two  
34 groups are usually mixed together in culinary preparations and, therefore, consumed  
35 together. Thus, we performed the analyses considering three groups of foods:  
36 unprocessed or minimally processed foods and processed culinary ingredients  
37 (individuals are able to determine the amount of table sugars they add), processed  
38 foods (sugar added by the food industry), and ultra-processed foods (sugar added by  
39 the food industry).  
40  
41  
42  
43  
44  
45  
46  
47

48 First, we estimated the distribution of total energy and free sugars intake  
49 according to the food groups. Then, we calculated the mean free sugars intake of the  
50 overall diet and the prevalence of excessive intake of free sugars. We used the WHO  
51 recommendations [5] to assess the excessive intake of free sugars (≥10% of total  
52 energy). Analyses using the UK recommendations to further limit free sugars intake to  
53 less than 5% of total energy intake are presented in a supplementary table (**Suppl.**  
54  
55  
56  
57  
58  
59  
60

1  
2  
3 **Table S3).** Analyses were carried out for the entire population and also stratified by  
4 age group.  
5

6  
7 Next, the prevalence of excessive intake of free sugars ( $\geq 10\%$  of total energy) was  
8 compared across quintiles of the energy share provided by each of the three food  
9 groups. Poisson regression was used to estimate prevalence ratios (PR) and 95%  
10 confidence intervals for the associations between each of the three NOVA food group  
11 quintiles and prevalence of individuals consuming more than 10% of total energy from  
12 free sugars. Tests of linear trend were performed to evaluate the quintiles as a single  
13 continuous variable. All analyses were stratified by age group. Multiple regression  
14 models were also performed to adjust for age, sex, ethnicity, region, survey year, and  
15 equivalised household income (sterling pounds). Analyses using the entire population  
16 are presented in a supplementary table (**Suppl. Table S4**). We also evaluated the  
17 extent to which the association between the exposure (dietary contribution of NOVA  
18 food groups) and the dietary content in free sugars changed according to the survey  
19 year, by including a multiplicative interaction term (survey year\*dietary contribution of  
20 NOVA food groups) in the fully adjusted models.  
21  
22

23  
24 Finally, we estimated the proportion of excessive free sugar intake that could be  
25 potentially avoided if exposure to the risk factors were eliminated (theoretical  
26 minimum risk exposure level scenarios) [22, 23]. The counterfactual scenarios were  
27 defined considering the main dietary sources of free sugars. The first counterfactual  
28 scenario assumed no consumption of ultra-processed food (potentially hidden sugars),  
29 while in the second scenario table sugar consumption was set to zero. Table sugar  
30 included honey, molasses, maple syrup (100%), and sugar added to coffee/juice and  
31 homemade dishes (potentially sugar that can be measured by the consumer).  
32 Examples of homemade dishes include: biscuits, fruit pies, buns cakes and pastries,  
33 cereal based milk puddings, and sponge pudding (**see Suppl. Table S2**).  
34  
35

36  
37 In both scenarios, we first calculated the prevalence of excessive free sugar intake  
38 in the UK population ( $P_{population}$ ). We then estimated the predicted prevalence of  
39 excessive free sugar intake that would be expected had the consumption of each of  
40 these main sources of free sugars being zero ( $P_{nonexposed}$ ). Lastly, we calculated the  
41 proportion of excessive free sugar intake that could be potentially avoided in each  
42 scenario using the following formula:  $(P_{population} - P_{nonexposed}) / P_{population}$ . Prevalences  
43  
44  
45  
46  
47  
48  
49  
50  
51  
52  
53  
54  
55  
56  
57  
58  
59  
60

1  
2  
3 were adjusted for sex, age, ethnicity, region, survey year, and household income.' To  
4  
5 test more feasible scenarios, we also estimated the percent reduction in prevalence of  
6  
7 excessive free sugar intake from reducing the consumption of ultra-processed foods  
8  
9 and table sugar by 50% (**see Suppl. Figure S2**).

10  
11 NDNS study weights were used in all analyses to account for sampling and non-  
12  
13 response error. All statistical analyses were carried out using Stata Statistical Software  
14  
15 version 14. The *p* values reported were two-tailed, and a threshold of <0.05 was  
16  
17 considered for statistically significant associations.

### 21 **Patient and public involvement**

22  
23 Patients and/or public were not involved in in the design or conduct of this study.  
24  
25  
26  
27

### 28 **RESULTS**

29  
30  
31  
32 Ultra-processed foods account for 56.8% of total energy intake and 64.7% of total  
33  
34 free sugars in the UK diet. Unprocessed or minimally processed foods and processed  
35  
36 culinary ingredients represented an additional 34.3% of total energy intake and 23.8%  
37  
38 of free sugars, and processed foods the remaining 8.8% of total energy intake and  
39  
40 11.5% of free sugars. Ultra-processed foods accounted for a higher percentage of total  
41  
42 energy intake among children (63.5%) and adolescents (68%). The average UK daily  
43  
44 intake of free sugars was 12.4% (SE 0.1) of total energy intake and 61.3% of British  
45  
46 exceeded the recommended limit of 10% energy from free sugars. This proportion was  
47  
48 even higher among children (74.9%) and adolescents (82.9%) (**Table 1**).  
49  
50  
51  
52  
53  
54  
55  
56  
57  
58  
59  
60

Table 1. Dietary contribution of NOVA food groups and indicators of the dietary content in free sugars according to age groups. UK population aged 1.5 years or over (2008–14).

| Age groups     | Dietary contribution (% of total energy intake)                           |             |                 |             |                       |             | % of total energy intake from free sugars                                 |             |                 |             |                       |             | Individuals with ≥10% of total energy intake from free sugars |             |              |              |              |
|----------------|---------------------------------------------------------------------------|-------------|-----------------|-------------|-----------------------|-------------|---------------------------------------------------------------------------|-------------|-----------------|-------------|-----------------------|-------------|---------------------------------------------------------------|-------------|--------------|--------------|--------------|
|                | Unprocessed or minimally processed foods + Processed culinary ingredients |             | Processed foods |             | Ultra-processed foods |             | Unprocessed or minimally processed foods + Processed culinary ingredients |             | Processed foods |             | Ultra-processed foods |             | Total                                                         |             | Overall diet |              |              |
|                | Mean                                                                      | SE          | Mean            | SE          | Mean                  | SE          | Mean                                                                      | SE          | Mean            | SE          | Mean                  | SE          | Mean                                                          | SE          | %            | 95%CI        |              |
| 1.5 - 10 years | 31.96                                                                     | 0.33        | 4.51            | 0.10        | 63.53                 | 0.34        | 18.82                                                                     | 0.45        | 5.15            | 0.22        | 76.03                 | 0.49        | 14.00                                                         | 0.14        | 74.94        | 72.78        | 76.99        |
| 11 - 18 years  | 27.25                                                                     | 0.37        | 4.75            | 0.16        | 68.00                 | 0.40        | 18.63                                                                     | 0.55        | 2.48            | 0.19        | 78.89                 | 0.57        | 15.78                                                         | 0.19        | 82.91        | 80.72        | 84.90        |
| 19 - 64 years  | 34.75                                                                     | 0.32        | 10.37           | 0.19        | 54.89                 | 0.35        | 24.68                                                                     | 0.50        | 12.96           | 0.38        | 62.36                 | 0.56        | 11.93                                                         | 0.14        | 56.59        | 54.47        | 58.68        |
| ≥65 years      | 38.57                                                                     | 0.49        | 8.45            | 0.29        | 52.98                 | 0.52        | 26.77                                                                     | 0.96        | 15.38           | 0.69        | 57.86                 | 1.01        | 11.36                                                         | 0.23        | 56.83        | 52.98        | 60.59        |
| <b>Total</b>   | <b>34.35</b>                                                              | <b>0.22</b> | <b>8.83</b>     | <b>0.13</b> | <b>56.82</b>          | <b>0.24</b> | <b>23.78</b>                                                              | <b>0.36</b> | <b>11.46</b>    | <b>0.27</b> | <b>64.75</b>          | <b>0.40</b> | <b>12.44</b>                                                  | <b>0.10</b> | <b>61.27</b> | <b>59.76</b> | <b>62.76</b> |

1  
2  
3 No significant interaction was observed between the exposure and the survey  
4 year for the total energy intake from free sugars (unprocessed or minimally processed  
5 foods + processed culinary ingredients:  $p = 0.254$ ; processed foods:  $p = 0.538$ ; ultra-  
6 processed foods:  $p = 0.137$ ), nor for the prevalence of excessive intake of free sugars  
7 (unprocessed or minimally processed foods + processed culinary ingredients:  $p =$   
8  $0.609$ ; processed foods:  $p = 0.262$ ; ultra-processed foods:  $p = 0.258$ ). Even so, we  
9 included variable survey year (1-6) in the adjusted model.  
10  
11  
12  
13  
14  
15

16 Indicators of the dietary content in free sugars according to quintiles of the  
17 dietary contribution of NOVA food groups stratified by age groups are shown in **Tables**  
18 **2 to 5** (1.5 – 10 years, 11 – 18 years, 19 – 64 years, and  $\geq 64$  years, respectively). The  
19 dietary contents of free sugars increased linearly across quintiles of ultra-processed  
20 food consumption for children (from 10.4% in the lowest quintile to 15.3% in the  
21 highest quintile), adolescents (from 12.7% to 17.4%, respectively) and adults (from  
22 9.6% to 15.2%, respectively), whereas the increase for elderly was not significant (from  
23 10.6% to 11.7%, respectively). The prevalence of excessive free sugar intake also  
24 increased linearly across quintiles of ultra-processed food consumption for children,  
25 adolescents and adults. Children in the highest quintiles of ultra-processed food  
26 consumption had a prevalence of excessive free sugar intake 60% higher (PRadj 1.6;  
27 95% CI 1.3 to 1.9) than those in the lowest quintile group. The same trend was  
28 observed for adolescents (PRadj 1.6 95% IC 1.2 – 1.9) and adults (PRadj 1.7 95% IC 1.5  
29 – 1.9). Although no linear trend was found between quintiles of ultra-processed food  
30 consumption and excessive free sugars intake among elderly ( $p > 0.05$ ), the fourth  
31 quintile group had a prevalence of excessive free sugar intake 35% higher (PRadj 1.3;  
32 95% CI 1.1 to 1.7) than those in the lowest quintile group.  
33  
34  
35  
36  
37  
38  
39  
40  
41  
42  
43  
44  
45  
46  
47

48 Opposite trends were observed for the group of unprocessed or minimally  
49 processed foods and processed culinary ingredients, where the prevalence of excessive  
50 free sugars intake decreased from the first to the last quintile of these food groups in  
51 all age groups. The prevalence of excessive free sugars intake also decreased from the  
52 first to the last quintile of processed foods, but only in adolescents and adults.  
53  
54  
55  
56  
57  
58  
59  
60



1  
2  
3           Sensitivity analysis performed by considering complete cases only indicated that  
4 the results of the multiple imputations did not differ significantly from the complete  
5 case analysis (data not shown).  
6  
7  
8  
9  
10  
11  
12  
13  
14  
15  
16  
17  
18  
19  
20  
21  
22  
23  
24  
25  
26  
27  
28  
29  
30  
31  
32  
33  
34  
35  
36  
37  
38  
39  
40  
41  
42  
43  
44  
45  
46  
47  
48  
49  
50  
51  
52  
53  
54  
55  
56  
57  
58  
59  
60

For peer review only

**Table 2. Indicators of the dietary content in free sugars according to quintiles of the dietary contribution of NOVA food groups in the UK population aged 1.5 - 10 years (2008-14).**

| Dietary contribution (% of total energy intake)                                  | % of total energy intake from free sugars |             | Individuals with $\geq 10\%$ of total energy intake from free sugars |                    |             |           |                   |                   |                          |              |  |
|----------------------------------------------------------------------------------|-------------------------------------------|-------------|----------------------------------------------------------------------|--------------------|-------------|-----------|-------------------|-------------------|--------------------------|--------------|--|
|                                                                                  | <i>Quintile</i>                           | <i>mean</i> | <i>min</i>                                                           | <i>max</i>         | <i>mean</i> | <i>SE</i> | <i>%</i>          | <i>PR*</i>        | <i>PRadj<sup>†</sup></i> | <i>95%CI</i> |  |
| <b>Unprocessed or minimally processed foods + Processed culinary ingredients</b> |                                           |             |                                                                      |                    |             |           |                   |                   |                          |              |  |
| 1st                                                                              | 15.36                                     | 0.00        | 20.92                                                                | 15.80              | 0.33        | 82.99     | 1.00              | 1.00              | –                        | –            |  |
| 2 <sup>nd</sup>                                                                  | 24.86                                     | 20.93       | 28.41                                                                | 14.60              | 0.30        | 79.62     | 0.96              | 0.95              | 0.89                     | 1.02         |  |
| 3 <sup>rd</sup>                                                                  | 31.57                                     | 28.46       | 34.96                                                                | 14.37              | 0.28        | 81.68     | 0.98              | 0.99              | 0.93                     | 1.06         |  |
| 4 <sup>th</sup>                                                                  | 39.30                                     | 34.98       | 43.86                                                                | 13.66              | 0.36        | 73.40     | 0.88              | 0.91              | 0.84                     | 0.99         |  |
| 5 <sup>th</sup>                                                                  | 52.46                                     | 43.97       | 79.93                                                                | 11.13 <sup>‡</sup> | 0.26        | 53.87     | 0.65 <sup>‡</sup> | 0.69 <sup>‡</sup> | 0.61                     | 0.78         |  |
| <b>Processed foods</b>                                                           |                                           |             |                                                                      |                    |             |           |                   |                   |                          |              |  |
| 1st                                                                              | 0.41                                      | 0.00        | 1.33                                                                 | 13.93              | 0.29        | 72.58     | 1.00              | 1.00              | –                        | –            |  |
| 2 <sup>nd</sup>                                                                  | 2.56                                      | 1.34        | 3.79                                                                 | 14.82              | 0.30        | 80.23     | 1.11              | 1.11              | 1.03                     | 1.19         |  |
| 3 <sup>rd</sup>                                                                  | 5.18                                      | 3.79        | 6.82                                                                 | 13.77              | 0.25        | 73.85     | 1.02              | 1.04              | 0.95                     | 1.13         |  |
| 4 <sup>th</sup>                                                                  | 8.96                                      | 6.83        | 11.95                                                                | 13.37              | 0.31        | 73.23     | 1.01              | 1.02              | 0.93                     | 1.12         |  |
| 5 <sup>th</sup>                                                                  | 16.05                                     | 12.04       | 41.71                                                                | 13.16              | 0.52        | 69.20     | 0.95              | 0.99              | 0.86                     | 1.14         |  |
| <b>Ultra-processed foods</b>                                                     |                                           |             |                                                                      |                    |             |           |                   |                   |                          |              |  |
| 1st                                                                              | 36.38                                     | 15.11       | 43.67                                                                | 10.35              | 0.38        | 46.41     | 1.00              | 1.00              | –                        | –            |  |
| 2 <sup>nd</sup>                                                                  | 49.00                                     | 43.72       | 53.03                                                                | 12.37              | 0.30        | 66.78     | 1.44              | 1.39              | 1.15                     | 1.70         |  |
| 3 <sup>rd</sup>                                                                  | 57.17                                     | 53.06       | 60.95                                                                | 13.84              | 0.37        | 74.22     | 1.60              | 1.50              | 1.24                     | 1.81         |  |
| 4 <sup>th</sup>                                                                  | 65.58                                     | 60.96       | 70.14                                                                | 14.48              | 0.26        | 80.95     | 1.74              | 1.62              | 1.35                     | 1.95         |  |
| 5 <sup>th</sup>                                                                  | 78.05                                     | 70.15       | 100                                                                  | 15.32 <sup>‡</sup> | 0.25        | 81.41     | 1.75 <sup>‡</sup> | 1.62 <sup>‡</sup> | 1.35                     | 1.95         |  |

\*PR=Prevalence ratios estimated using Poisson regression.

<sup>†</sup>PRadj=Prevalence ratios adjusted for sex, age, race/ethnicity (White, Mixed ethnic group, Black or Black British, Asian or Asian British and Other race), region, survey year, and household income.

<sup>‡</sup>Significant linear trend across all quintiles ( $p \leq 0.01$ ).

**Table 3. Indicators of the dietary content in free sugars according to quintiles of the dietary contribution of NOVA food groups in the UK population aged 11 - 18 years (2008-14).**

| Dietary contribution (% of total energy intake)                                  |       |       |       | % of total energy intake from free sugars |      | Individuals with ≥10% of total energy intake from free sugars |                   |                    |       |      |
|----------------------------------------------------------------------------------|-------|-------|-------|-------------------------------------------|------|---------------------------------------------------------------|-------------------|--------------------|-------|------|
| Quintile                                                                         | mean  | min   | max   | mean                                      | SE   | %                                                             | PR*               | PRadj <sup>i</sup> | 95%CI |      |
| <b>Unprocessed or minimally processed foods + Processed culinary ingredients</b> |       |       |       |                                           |      |                                                               |                   |                    |       |      |
| 1st                                                                              | 14.43 | 0.00  | 20.89 | 17.28                                     | 0.36 | 88.89                                                         | 1.00              | 1.00               | –     | –    |
| 2nd                                                                              | 24.61 | 20.92 | 28.43 | 15.87                                     | 0.35 | 84.30                                                         | 0.95              | 0.95               | 0.89  | 1.01 |
| 3rd                                                                              | 31.46 | 28.44 | 34.93 | 15.50                                     | 0.37 | 81.82                                                         | 0.92              | 0.92               | 0.86  | 0.99 |
| 4th                                                                              | 39.24 | 34.98 | 43.84 | 13.96                                     | 0.43 | 78.15                                                         | 0.88              | 0.89               | 0.82  | 0.96 |
| 5th                                                                              | 52.96 | 43.88 | 79.86 | 13.60 <sup>¥</sup>                        | 0.80 | 66.92                                                         | 0.75 <sup>¥</sup> | 0.77 <sup>¥</sup>  | 0.66  | 0.88 |
| <b>Processed foods</b>                                                           |       |       |       |                                           |      |                                                               |                   |                    |       |      |
| 1st                                                                              | 0.29  | 0.00  | 1.33  | 17.18                                     | 0.41 | 85.11                                                         | 1.00              | 1.00               | –     | –    |
| 2nd                                                                              | 2.56  | 1.34  | 3.79  | 15.81                                     | 0.35 | 81.74                                                         | 0.96              | 0.96               | 0.90  | 1.03 |
| 3rd                                                                              | 5.16  | 3.80  | 6.81  | 15.62                                     | 0.35 | 86.87                                                         | 1.02              | 1.02               | 0.96  | 1.09 |
| 4th                                                                              | 8.94  | 6.82  | 11.95 | 14.52                                     | 0.43 | 79.40                                                         | 0.93              | 0.93               | 0.86  | 1.01 |
| 5th                                                                              | 17.53 | 12.05 | 41.62 | 13.68 <sup>¥</sup>                        | 0.57 | 74.89                                                         | 0.88 <sup>£</sup> | 0.87 <sup>£</sup>  | 0.78  | 0.99 |
| <b>Ultra-processed foods</b>                                                     |       |       |       |                                           |      |                                                               |                   |                    |       |      |
| 1st                                                                              | 35.29 | 18.40 | 42.94 | 12.72                                     | 1.39 | 56.18                                                         | 1.00              | 1.00               | –     | –    |
| 2nd                                                                              | 49.35 | 43.70 | 53.03 | 13.65                                     | 0.56 | 75.73                                                         | 1.35              | 1.34               | 1.03  | 1.74 |
| 3rd                                                                              | 56.91 | 53.08 | 60.96 | 14.19                                     | 0.40 | 79.24                                                         | 1.41              | 1.40               | 1.09  | 1.80 |
| 4th                                                                              | 65.63 | 60.96 | 70.13 | 14.99                                     | 0.32 | 80.76                                                         | 1.44              | 1.42               | 1.11  | 1.82 |
| 5th                                                                              | 79.05 | 70.14 | 100   | 17.37 <sup>¥</sup>                        | 0.29 | 89.04                                                         | 1.58 <sup>¥</sup> | 1.56 <sup>¥</sup>  | 1.23  | 1.99 |

\*PR=Prevalence ratios estimated using Poisson regression.

<sup>i</sup>PRadj=Prevalence ratios adjusted for sex, age, race/ethnicity (White, Mixed ethnic group, Black or Black British, Asian or Asian British and Other race), region, survey year, and household income.

<sup>¥</sup>Significant linear trend across all quintiles (p≤0.01).

<sup>£</sup>Significant linear trend across all quintiles (p≤0.05).

**Table 4. Indicators of the dietary content in free sugars according to quintiles of the dietary contribution of NOVA food groups in the UK population aged 19 - 64 years (2008-14).**

| Dietary contribution (% of total energy intake)                                  |       |       |       | % of total energy intake from free sugars |      | Individuals with $\geq 10\%$ of total energy intake from free sugars |                   |                    |       |      |
|----------------------------------------------------------------------------------|-------|-------|-------|-------------------------------------------|------|----------------------------------------------------------------------|-------------------|--------------------|-------|------|
| Quintile                                                                         | mean  | min   | max   | mean                                      | SE   | %                                                                    | PR*               | PRadj <sup>i</sup> | 95%CI |      |
| <b>Unprocessed or minimally processed foods + Processed culinary ingredients</b> |       |       |       |                                           |      |                                                                      |                   |                    |       |      |
| 1st                                                                              | 15.06 | 0.00  | 20.92 | 15.11                                     | 0.36 | 35.87                                                                | 1.00              | –                  | –     |      |
| 2nd                                                                              | 24.93 | 20.95 | 28.41 | 12.87                                     | 0.31 | 31.12                                                                | 0.85              | 0.87               | 0.79  | 0.96 |
| 3rd                                                                              | 31.65 | 28.43 | 34.96 | 11.97                                     | 0.31 | 30.87                                                                | 0.79              | 0.85               | 0.77  | 0.94 |
| 4th                                                                              | 38.95 | 34.97 | 43.88 | 11.01                                     | 0.28 | 28.45                                                                | 0.66              | 0.72               | 0.64  | 0.80 |
| 5th                                                                              | 54.24 | 43.93 | 91.90 | 9.89 <sup>‡</sup>                         | 0.25 | 25.28                                                                | 0.57 <sup>‡</sup> | 0.62 <sup>‡</sup>  | 0.55  | 0.71 |
| <b>Processed foods</b>                                                           |       |       |       |                                           |      |                                                                      |                   |                    |       |      |
| 1st                                                                              | 0.28  | 0.00  | 1.32  | 13.09                                     | 0.50 | 59.14                                                                | 1.00              | 1.00               | –     |      |
| 2nd                                                                              | 2.60  | 1.34  | 3.79  | 12.82                                     | 0.41 | 60.65                                                                | 1.03              | 1.04               | 0.92  | 1.19 |
| 3rd                                                                              | 5.35  | 3.79  | 6.82  | 12.17                                     | 0.30 | 61.42                                                                | 1.04              | 1.04               | 0.92  | 1.18 |
| 4th                                                                              | 9.36  | 6.82  | 12.03 | 11.62                                     | 0.26 | 55.92                                                                | 0.95              | 0.98               | 0.87  | 1.11 |
| 5th                                                                              | 19.80 | 12.04 | 65.22 | 11.27 <sup>‡</sup>                        | 0.22 | 52.47                                                                | 0.89 <sup>‡</sup> | 0.92 <sup>‡</sup>  | 0.82  | 1.03 |
| <b>Ultra-processed foods</b>                                                     |       |       |       |                                           |      |                                                                      |                   |                    |       |      |
| 1st                                                                              | 34.45 | 1.82  | 43.67 | 9.62                                      | 0.27 | 39.42                                                                | 1.00              | 1.00               | –     |      |
| 2nd                                                                              | 48.70 | 43.69 | 53.04 | 11.11                                     | 0.25 | 53.34                                                                | 1.35              | 1.30               | 1.13  | 1.50 |
| 3rd                                                                              | 57.08 | 53.06 | 60.96 | 11.83                                     | 0.29 | 56.84                                                                | 1.44              | 1.37               | 1.19  | 1.57 |
| 4th                                                                              | 65.34 | 60.96 | 70.14 | 13.09                                     | 0.32 | 66.31                                                                | 1.68              | 1.57               | 1.37  | 1.79 |
| 5th                                                                              | 78.04 | 70.15 | 100   | 15.21 <sup>‡</sup>                        | 0.38 | 74.30                                                                | 1.88 <sup>‡</sup> | 1.67 <sup>‡</sup>  | 1.46  | 1.92 |

\*PR=Prevalence ratios estimated using Poisson regression.

<sup>i</sup>PRadj=Prevalence ratios adjusted for sex, age, race/ethnicity (White, Mixed ethnic group, Black or Black British, Asian or Asian British and Other race), region, survey year, and household income.

<sup>‡</sup>Significant linear trend across all quintiles ( $p \leq 0.01$ ).

**Table 5. Indicators of the dietary content in free sugars according to quintiles of the dietary contribution of NOVA food groups in the UK population aged 65 years or over (2008-14).**

| Dietary contribution (% of total energy intake)                                  | %        |       | % of total energy intake from free sugars |       | Individuals with ≥10% of total energy intake from free sugars |       |                   |                   |                    |       |  |
|----------------------------------------------------------------------------------|----------|-------|-------------------------------------------|-------|---------------------------------------------------------------|-------|-------------------|-------------------|--------------------|-------|--|
|                                                                                  | Quintile | mean  | min                                       | max   | mean                                                          | SE    | %                 | PR*               | PRadj <sup>i</sup> | 95%CI |  |
| <b>Unprocessed or minimally processed foods + Processed culinary ingredients</b> |          |       |                                           |       |                                                               |       |                   |                   |                    |       |  |
| 1st                                                                              | 16.63    | 6.34  | 20.82                                     | 11.67 | 0.87                                                          | 56.16 | 1.00              | 1.00              | –                  | –     |  |
| 2nd                                                                              | 25.04    | 20.95 | 28.36                                     | 12.83 | 0.61                                                          | 67.39 | 1.20              | 1.19              | 0.9                | 1.5   |  |
| 3rd                                                                              | 32.06    | 28.44 | 34.90                                     | 11.98 | 0.48                                                          | 64.37 | 1.15              | 1.15              | 0.8                | 1.5   |  |
| 4th                                                                              | 39.30    | 34.98 | 43.85                                     | 10.93 | 0.44                                                          | 53.96 | 0.96              | 0.97              | 0.7                | 1.2   |  |
| 5th                                                                              | 52.26    | 43.89 | 78.36                                     | 10.70 | 0.42                                                          | 50.94 | 0.91 <sup>£</sup> | 0.91 <sup>£</sup> | 0.6                | 1.2   |  |
| <b>Processed foods</b>                                                           |          |       |                                           |       |                                                               |       |                   |                   |                    |       |  |
| 1st                                                                              | 0.38     | 0.00  | 1.32                                      | 9.70  | 0.72                                                          | 43.52 | 1.00              | 1.00              | –                  | –     |  |
| 2nd                                                                              | 2.42     | 1.34  | 3.78                                      | 12.13 | 0.56                                                          | 64.30 | 1.48              | 1.49              | 1.1                | 1.9   |  |
| 3rd                                                                              | 5.23     | 3.79  | 6.81                                      | 12.16 | 0.45                                                          | 65.00 | 1.49              | 1.52              | 1.1                | 1.9   |  |
| 4th                                                                              | 9.27     | 6.82  | 12.02                                     | 11.10 | 0.47                                                          | 54.46 | 1.25              | 1.27              | 0.9                | 1.6   |  |
| 5th                                                                              | 19.10    | 12.04 | 50.86                                     | 11.23 | 0.46                                                          | 53.62 | 1.23              | 1.29              | 0.9                | 1.6   |  |
| <b>Ultra-processed foods</b>                                                     |          |       |                                           |       |                                                               |       |                   |                   |                    |       |  |
| 1st                                                                              | 35.98    | 7.79  | 43.69                                     | 10.63 | 0.49                                                          | 47.63 | 1.00              | 1.00              | –                  | –     |  |
| 2nd                                                                              | 48.67    | 43.74 | 53.02                                     | 11.30 | 0.48                                                          | 58.67 | 1.23              | 1.20              | 0.9                | 1.4   |  |
| 3rd                                                                              | 56.97    | 53.05 | 60.91                                     | 11.61 | 0.45                                                          | 59.89 | 1.26              | 1.21              | 0.9                | 1.5   |  |
| 4th                                                                              | 64.99    | 61.01 | 70.08                                     | 12.01 | 0.54                                                          | 65.53 | 1.38              | 1.35              | 1.0                | 1.6   |  |
| 5th                                                                              | 75.66    | 70.17 | 92.30                                     | 11.67 | 0.70                                                          | 53.75 | 1.13              | 1.06              | 0.8                | 1.4   |  |

\*PR=Prevalence ratios estimated using Poisson regression.

<sup>i</sup>PRadj=Prevalence ratios adjusted for sex, age, race/ethnicity (White, Mixed ethnic group, Black or Black British, Asian or Asian British and Other race), region, survey year, and household income.

\*Significant linear trend across all quintiles (p≤0.01).

<sup>£</sup>Significant linear trend across all quintiles (p≤0.05).

In our counterfactual scenarios, we calculated the percentage of excessive free sugar intake avoided if the consumption of ultra-processed foods and table sugar were zero (**Figure 1**). We estimated that about 47% of the prevalence of excessive free

1  
2  
3 sugars intake in the UK population could be potentially avoided if the consumption of  
4 ultra-processed foods was eliminated. Eliminating table sugar could potentially avoid  
5 9.4% of the prevalence of excessive free sugars intake. This greater reduction in the  
6 percentage of excessive free sugar intake due to elimination of ultra-processed foods,  
7 relative to table sugar, was observed in all age groups, except in the elderly group  
8 where both scenarios had similar impacts on total free sugar intake. For the more  
9 feasible scenario, we found a similar trend where a greater reduction in the  
10 percentage of excessive free sugar intake due to a 50% reduction of ultra-processed  
11 foods, relative to table sugar, was observed in all age groups, except in the elderly  
12 group (see Suppl. Figure S2).  
13  
14  
15  
16  
17  
18  
19  
20  
21  
22  
23

## 24 DISCUSSION

25  
26  
27  
28 In this large, nationally representative sample of the UK population, higher  
29 consumption of ultra-processed food was associated with greater dietary content of  
30 free sugars in children, adolescents, and adults. Using theoretical minimum risk  
31 exposure level scenarios, we also showed that by eliminating ultra-processed food  
32 consumption, the prevalence of excessive free sugar intake (10% or more of total  
33 energy intake) could be potentially reduced from 60% to 31%. In children and  
34 adolescents, the potential reduction could be from 74% to 45% and from 83% to 53%,  
35 respectively.  
36  
37  
38  
39  
40  
41  
42

43 Our findings confirm an excessive consumption of free sugars in the UK diet [13]  
44 and show that ultra-processed foods contributed nearly 65% of all free sugars in all age  
45 groups and nearly 80% in children and adolescents. Unprocessed or minimally  
46 processed foods (mostly fresh juice) and processed culinary ingredients (mostly table  
47 sugar) contributed between 19% and 27% of the dietary content of free sugars, while  
48 processed foods provided the lowest contribution in all age groups.  
49  
50  
51  
52  
53  
54

55 Our findings are similar to previous studies conducted in high- and middle-  
56 income countries that have shown strong associations between the intake of ultra-  
57 processed foods and the dietary content of free sugars [8-11]. A previous study  
58  
59  
60

1  
2  
3 conducted in Chile similarly showed that the association between ultra-processed food  
4 consumption and the dietary content of added sugars is more pronounced among  
5 children and adolescents [12]. In our study, there was no linear association between  
6 ultra-processed food consumption and dietary content of free sugars among the  
7 elderly. Although the prevalence of excessive free sugar intake was higher in the fourth  
8 in regards to the first quintile of ultra-processed food consumption, the prevalence in  
9 the highest quintile group was not different from the first. A possible explanation for  
10 this finding could be changes in the composition of different types of ultra-processed  
11 across quintiles in the elderly. Actually, while in the overall population, ultra-processed  
12 sweetened products such as soft/fruit drinks, confectionary, milk-based drinks, and  
13 biscuits monotonically increased across quintiles (from 18% to 23% of the total calories  
14 from ultra-processed foods), in the elderly a drop in consumption was observed  
15 between the fourth and fifth quintiles (from 18 to 15%) (data no shown).

16  
17  
18  
19  
20  
21  
22  
23  
24  
25  
26  
27  
28  
29  
30  
31  
32  
33  
34  
35  
36  
37  
38  
39  
40  
41  
42  
43  
44  
45  
46  
47  
48  
49  
50  
51  
52  
53  
54  
55  
56  
57  
58  
59  
60  
There is strong evidence that the high consumption of free sugars contributes to  
excess obesity, type 2 diabetes, dyslipidaemia, hypertension and coronary heart  
disease [2-4]. Consequently, most dietary recommendations now advise limiting free  
sugar intake, but more focused efforts are needed to put this recommendation into  
practice. Changing personal behaviour and choice alone is not an effective or realistic  
option as our findings confirm that the majority of free sugar is added to food before it  
is marketed and sold. Voluntary agreements between industry and government have  
been shown repeatedly to be ineffective in improving public health [24]. This is  
confirmed by recent UK experience where the early stages of the government's sugar  
reduction programme, which challenged the food industry to voluntarily cut sugar in  
some products, has produced only slow progress toward proposed targets [25]. Thus,  
more drastic measures that change the availability, price and marketing of these  
products is necessary.

The analyses presented here suggest that actions to reduce the consumption of  
ultra-processed foods often rich in free sugars could lead to larger public health  
benefits. Policies concerning the use of fiscal measures to reduce intake of free sugars  
and improve diet quality should consider extending beyond artificially sweetened

1  
2  
3 beverages to include the main driver of excessive free sugar intake, including dairy  
4 drinks, cakes, biscuits and confectionery [13].  
5  
6

7 To our knowledge, this is the first study to examine the association between  
8 consumption of ultra-processed foods, as defined per NOVA [6], and dietary content of  
9 free sugar in different age groups of the UK population. The use of NOVA is a key  
10 strength of the study as it classified foods by their level of processing level using  
11 standardised and objective criteria. NOVA has been recognised as a valid tool for  
12 public health and nutrition research and policy by the Food and Agricultural  
13 Organization of the United Nations [26] and the Pan American Health Organization  
14 [27]. In addition, we used data from the NDNS - a large and nationally representative  
15 sample of the UK population, applying weighting to reduce any sampling and non-  
16 response bias. Unlike household budget data, food diaries employed in the NDNS take  
17 food wastage into account, include food eaten out of home, and do not assume that all  
18 individuals within a household consume the same diet. Importantly, the dietary data  
19 also allowed for the disaggregation of dishes into their constituents and classification  
20 of the underlying ingredients, which enabled the calculation of more precise estimates  
21 of intakes of each NOVA group and reduced misclassification.  
22  
23  
24  
25  
26  
27  
28  
29  
30  
31  
32  
33  
34

35 Potential limitations should be considered. The dietary data we used were self-  
36 reported and may be subject to misclassification. A constant limitation of dietary  
37 assessment methods is underreporting of some foods (particularly unhealthy foods),  
38 though food diaries are recognised to be one of the most comprehensive methods for  
39 assessing dietary intake. Possible underreporting of unhealthy foods may lead to an  
40 underestimation of the dietary contribution of ultra-processed foods and the overall  
41 intake of free sugars, but may less likely affect the association between these  
42 variables. Nevertheless, accurate and valid NDNS data were achieved through optimal  
43 methods for collecting dietary intake [28] which helped to minimise missing  
44 information. NDNS collects limited information indicative of food processing (for  
45 example, place of meals and product brands), which may lead to misclassification of  
46 food items. This bias is more likely for a small number of specific food items such as  
47 pizza where there is insufficient information for classification purposes (see **Suppl.**  
48 **Table S2**). In those cases, the most frequently consumed alternative (culinary  
49  
50  
51  
52  
53  
54  
55  
56  
57  
58  
59  
60



1  
2  
3 preparation or manufactured product) was chosen. Finally, our theoretical minimum  
4 risk exposure models estimate the potential impact of eliminating each of the main  
5 sources of free sugars on excessive free sugar intake, ignoring substitutions that may  
6 occur in the consumption of other foods. Although our findings suggest that greater  
7 reduction in excessive free sugar intake could be achieved by eliminating ultra-  
8 processed food consumption, guidance to the public about reducing the consumption  
9 of table sugar remains an important component of any public health guidance.  
10  
11  
12  
13  
14  
15  
16  
17  
18

## 19 **Conclusions**

20  
21 Almost half of excessive intake of free sugars in the UK can be attributed to ultra-  
22 processed foods. Policies to reduce sugar consumption should focus on minimizing  
23 consumption of ultra-processed foods and replacing them with unprocessed or  
24 minimally processed foods alternatives. The study adds to a growing body of evidence  
25 that ultra-processed foods are a major contributor to growth of diet related non-  
26 communicable diseases globally.  
27  
28  
29  
30  
31  
32  
33  
34

35 **Author contributions:** CAM, EMS, FR, MLdCL, and RBL designed the research. FR and  
36 RBL undertook data management and analysis. CAM, CM, EMS, FR, LFMR, MLdCL, and  
37 RBL interpreted the data. FR wrote the first draft of the manuscript. All authors read,  
38 edited and approved the final manuscript.  
39  
40  
41  
42

43 **Funding:** This work was supported by the Fundação de Amparo à Pesquisa do Estado  
44 de São Paulo (FAPESP), grant numbers 2015/14900-9, 2016/14302-7 (FR is a  
45 beneficiary of a postdoctoral fellowship), and 2014/25614-4 (LFMR is a beneficiary of a  
46 doctoral fellowship). FAPESP had no role in the design, analysis or writing of this  
47 manuscript.  
48  
49  
50  
51

52 **Competing interests:** None declared.  
53

54 **Data sharing statement:** This study is based on open data of the UK population that is  
55 available in the UK Data Archive website (<http://www.esds.ac.uk>).  
56  
57  
58  
59  
60

**REFERENCES**

1. Scientific Advisory Committee on Nutrition. SACN's Sugars and Health Recommendations: Why 5%. London, UK: Scientific Advisory Committee on Nutrition, Department of Health, 2015.
2. Te Morenga LA, Howatson AJ, Jones RM, Mann J. Dietary sugars and cardiometabolic risk: systematic review and meta-analyses of randomized controlled trials of the effects on blood pressure and lipids. *Am J Clin Nutr* 2014;100(1):65-79.
3. Scientific Advisory Committee on Nutrition. Carbohydrates and Health Report. London, UK: Scientific Advisory Committee on Nutrition, Department of Health, 2015.
4. Te Morenga L, Mallard S, Mann J. Dietary sugars and body weight: systematic review and meta-analyses of randomised controlled trials and cohort studies. *BMJ* 2013;346:e7492.
5. World Health Organization. Sugars intake for adults and children. Geneva, Switzerland: World Health Organization, 2015.
6. Monteiro CA, Cannon G, Moubarac JC, Levy RB, Louzada ML, Jaime PC. The UN decade of nutrition, the NOVA food classification and the trouble with ultra-processing. *Public Health Nutr* 2018;21:5–17.
7. Martinez Steele E, Popkin BM, Swinburn B, Monteiro CA. The share of ultra-processed foods and the overall nutritional quality of diets in the US: evidence from a nationally representative cross-sectional study. *Popul Health Metr* 2017;15:6.
8. Moubarac JC, Batal M, Louzada ML, Martinez Steele E, Monteiro CA. Consumption of ultra-processed foods predicts diet quality in Canada. *Appetite* 2017;108:512-520.
9. Rauber F, da Costa Louzada ML, Steele EM, Millett C, Monteiro CA, Levy RB. Ultra-Processed Food Consumption and Chronic Non-Communicable Diseases-

- 1  
2  
3 Related Dietary Nutrient Profile in the UK (2008-2014). *Nutrients*. 2018;10(5)  
4 9;10(5), pii: E587.  
5  
6  
7 10. Martinez Steele E, Baraldi LG, Louzada ML, Moubarac JC, Mozaffarian D,  
8 Monteiro CA. Ultra-processed foods and added sugars in the US diet: evidence  
9 from a nationally representative cross-sectional study. *BMJ Open*  
10 2016;6(3):e009892.  
11  
12  
13 11. Louzada M, Ricardo CZ, Steele EM, Levy RB, Cannon G, Monteiro CA. The share  
14 of ultra-processed foods determines the overall nutritional quality of diets in  
15 Brazil. *Public Health Nutr* 2018;21(1):94-102.  
16  
17  
18 12. Cediel G, Reyes M, da Costa Louzada ML, Martinez Steele E, Monteiro CA,  
19 Corvalán C, Uauy R. Ultra-processed foods and added sugars in the Chilean diet  
20 (2010). *Public Health Nutr* 2018;21(1):125-133.  
21  
22  
23 13. Public Health England. National Diet and Nutrition Survey Results from years 7  
24 and 8 (Combined) of the Rolling Programme (2014/2015 to 2015/2016).  
25 London, UK: Public Health England, 2018.  
26  
27  
28 14. Department of Health and Social Care: Global Public Health Directorate:  
29 Obesity, Food and Nutrition. Childhood obesity: a plan for action, Chapter 2.  
30 London, UK: Department of Health and Social Care, 2018.  
31  
32  
33 15. Public Health England. National Diet and Nutrition Survey Results from Years 1,  
34 2, 3 and 4 (Combined) of the Rolling Programme (2008/2009–2011/2012).  
35 London, UK: Public Health England, 2014.  
36  
37  
38 16. Fitt E, Cole D, Ziauddeen N, Pell D, Stickley E, Harvey A, Stephen AM. DINO (Diet  
39 In Nutrients Out) - an integrated dietary assessment system. *Public Health Nutr*  
40 2015;18(2):234-241.  
41  
42  
43 17. Public Health England. McCance and Widdowson's the composition of foods  
44 integrated dataset 2015. London, UK: Public Health England, 2015.  
45  
46  
47 18. Monteiro CA, Cannon G, Levy RB, Moubarac JC, Jaime PC, Martins AP, Canella  
48 D, Louzada MLDC, Parra D. NOVA. The star shines bright. *World Nutrition*  
49 2016;7(1-3):28-38.  
50  
51  
52  
53  
54  
55  
56  
57  
58  
59  
60

- 1  
2  
3 19. Fitt E, Mak TN, Stephen AM, Prynne C, Roberts C, Swan G, Farron-Wilson M.  
4 Disaggregating composite food codes in the UK National Diet and Nutrition  
5 Survey food composition databank. *Eur J Clin Nutr* 2010;64 Suppl 3:S32-36.  
6  
7
- 8  
9 20. White IR, Royston P, Wood AM. Multiple imputation using chained equations:  
10 Issues and guidance for practice. *Stat Med* 2011;30(4):377-399.  
11  
12
- 13 21. Nielsen SJ, Adair L. An alternative to dietary data exclusions. *J Am Diet Assoc*  
14 2007;107(5):792-799.  
15  
16
- 17 22. Steenland K, Armstrong B. An overview of methods for calculating the burden  
18 of disease due to specific risk factors. *Epidemiology*. 2006 Sep;17(5):512-9.  
19  
20
- 21 23. Rezende LFM, Eluf-Neto J. Population attributable fraction: planning of diseases  
22 prevention actions in Brazil. *Rev Saúde Pública* 2016;50:30.  
23  
24
- 25 24. Moodie R, Stuckler D, Monteiro CA, Sheron N, Neal B, Thamarangsi T, Lincoln P,  
26 Casswell S. Profits and pandemics: prevention of harmful effects of tobacco,  
27 alcohol, and ultra-processed food and drink industries. *Lancet*  
28 2013;381(9867):670-679.  
29  
30
- 31 25. Public Health England. First measure of industry progress to cut sugar unveiled  
32 [press release]. London, UK: Public Health England, 2018.  
33  
34
- 35 26. Food and Agriculture Organization of the United Nations. Guidelines on the  
36 collection of information on food processing through food consumption  
37 surveys. Rome, Italy: Food and Agriculture Organization of the United Nations,  
38 2015.  
39  
40
- 41 27. Pan American Health Organization. Ultra-processed Food and Drink Products in  
42 Latin America: Trends, Impact on Obesity, Policy Implications. Washington, DC:  
43 Pan American Health Organization, 2015.  
44  
45
- 46 28. Public Health England. Dietary data collection and editing. In *National Diet and*  
47 *Nutrition Survey. Results from years 1–4 (combined) of the Rolling Programme*  
48 *(2008/2009–2011/2012)*. London, UK: Public Health England, 2014. Available  
49 online:  
50 [https://www.gov.uk/government/statistics/national-diet-](https://www.gov.uk/government/statistics/national-diet-and-nutrition-survey-results-from-years-1-to-4-combined-of-the-rolling-)  
51 [and-nutrition-survey-results-from-years-1-to-4-combined-of-the-rolling-](https://www.gov.uk/government/statistics/national-diet-and-nutrition-survey-results-from-years-1-to-4-combined-of-the-rolling-)  
52  
53  
54  
55  
56  
57  
58  
59  
60

1  
2  
3  
4  
5  
6  
7  
8  
9  
10  
11  
12  
13  
14  
15  
16  
17  
18  
19  
20  
21  
22  
23  
24  
25  
26  
27  
28  
29  
30  
31  
32  
33  
34  
35  
36  
37  
38  
39  
40  
41  
42  
43  
44  
45  
46  
47  
48  
49  
50  
51  
52  
53  
54  
55  
56  
57  
58  
59  
60

programme-for-2008-and-2009-to-2011-and-2012 (accessed on 15 January 2018).

For peer review only

1  
2  
3 **Figure 1.** Percentage of excessive free sugar intake that would be avoided under two  
4 counterfactual scenarios regarding the consumption of the main dietary sources of  
5 free sugar. UK population aged 1.5 years or over (2008–14).  
6  
7  
8  
9  
10  
11  
12  
13  
14  
15  
16  
17  
18  
19  
20  
21  
22  
23  
24  
25  
26  
27  
28  
29  
30  
31  
32  
33  
34  
35  
36  
37  
38  
39  
40  
41  
42  
43  
44  
45  
46  
47  
48  
49  
50  
51  
52  
53  
54  
55  
56  
57  
58  
59  
60

For peer review only

Figure 1.

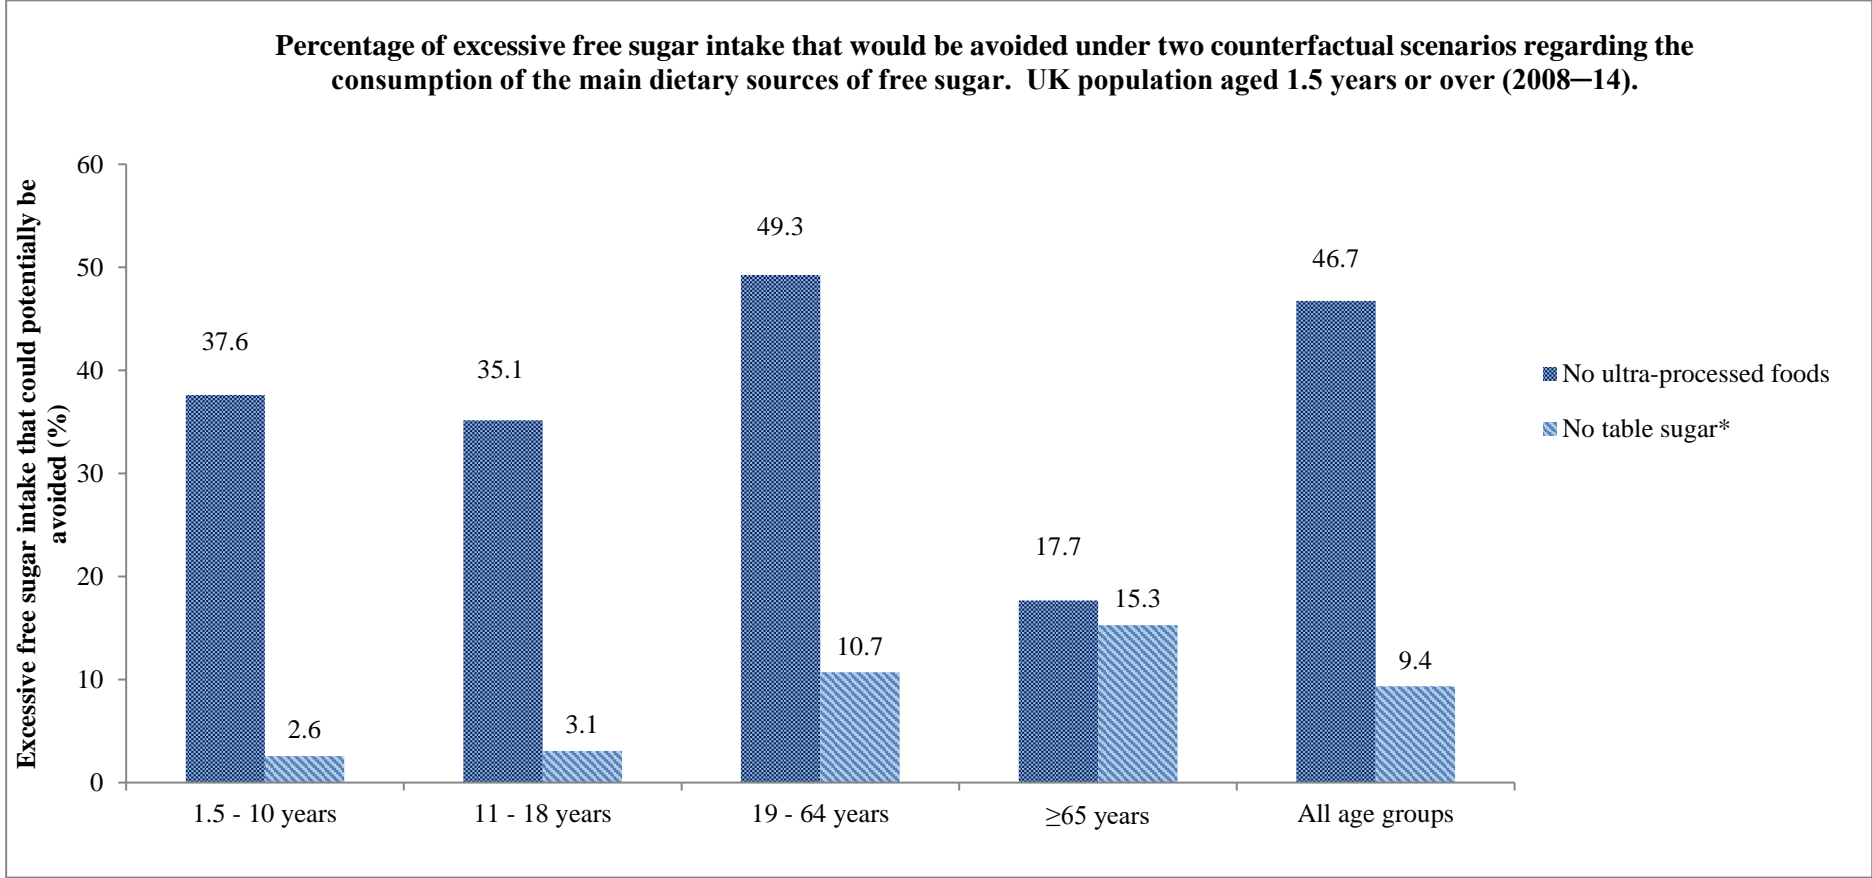

\*Including honey, molasses, maple syrup (100%).

1  
2  
3  
4 **Ultra-processed foods and excessive free sugar intake in the United Kingdom: a nationally**  
5 **representative cross-sectional study.**  
6  
7  
8  
9

10 Fernanda Rauber <sup>1,2</sup>, Maria Laura da Costa Louzada <sup>1,3</sup>, Eurídice Martínez Steele <sup>1,2</sup>, Leandro  
11 Fórnias Machado de Rezende <sup>1,4</sup>, Christopher Millett <sup>1,5</sup>, Carlos Augusto Monteiro <sup>1,2</sup>, Renata  
12 Bertazzi Levy <sup>1,6</sup>  
13  
14  
15  
16

17 <sup>1</sup> Núcleo de Pesquisas Epidemiológicas em Nutrição e Saúde, Universidade de São Paulo, São  
18 Paulo, Brasil.

19 <sup>2</sup> Departamento de Nutrição, Faculdade de Saúde Pública, Universidade de São Paulo, São  
20 Paulo, Brasil.

21 <sup>3</sup> Departamento de Políticas Públicas e Saúde Coletiva, Universidade Federal de São Paulo,  
22 São Paulo, Brasil.

23 <sup>4</sup> Universidade Federal de São Paulo. Escola Paulista de Medicina. Departamento de  
24 Medicina Preventiva. São Paulo - SP, Brasil.

25 <sup>5</sup> Public Health Policy Evaluation Unit, School of Public Health, Imperial College London,  
26 London, United Kingdom.

27 <sup>6</sup> Departamento de Medicina Preventiva, Faculdade de Medicina FMUSP, Universidade de  
28 São Paulo, São Paulo, Brasil.  
29  
30  
31  
32  
33  
34  
35  
36  
37  
38  
39  
40  
41  
42  
43  
44  
45  
46  
47  
48  
49  
50  
51  
52  
53  
54  
55  
56  
57  
58  
59  
60



**Supplementary table S1. The Nova food classification system\***

| Food groups                                                                                                                                                                                                                                                                                                                                                                                                                                                                                                                                                                                                                                                                                                  | Examples                                                                                                                                                                                                                                                                                                                                                                                                                                                                                                                                                                                                                             |
|--------------------------------------------------------------------------------------------------------------------------------------------------------------------------------------------------------------------------------------------------------------------------------------------------------------------------------------------------------------------------------------------------------------------------------------------------------------------------------------------------------------------------------------------------------------------------------------------------------------------------------------------------------------------------------------------------------------|--------------------------------------------------------------------------------------------------------------------------------------------------------------------------------------------------------------------------------------------------------------------------------------------------------------------------------------------------------------------------------------------------------------------------------------------------------------------------------------------------------------------------------------------------------------------------------------------------------------------------------------|
| <p><b>1) Unprocessed foods or minimally processed foods</b></p> <p>Natural foods altered by methods such as freezing, pasteurization, fermentation, removal of inedible or unwanted parts, grinding, and other methods that do not include the addition of substances such as salt, sugar and/or oils or fats.</p>                                                                                                                                                                                                                                                                                                                                                                                           | <p>Fresh, dry or frozen fruits or vegetables; legumes; grains, roots and tubers, flours and pasta; pasteurized or power plain milk and plain yogurt; fresh or frozen meat (fish, poultry and red meat); eggs; nuts and seeds; fungi; fresh or pasteurised fruit or vegetable juices without added sugar, sweeteners or flavours; tea, coffee and drinking water.</p>                                                                                                                                                                                                                                                                 |
| <p><b>2) Processed culinary ingredients</b></p> <p>Substances obtained directly from group 1 foods or from nature by processes that include pressing, refining, grinding, milling, and drying, and consumed in combination with group 1 foods in freshly prepared dishes or drinks.</p>                                                                                                                                                                                                                                                                                                                                                                                                                      | <p>Salt; sugar, honey and molasses; vegetable oils; butter and lard; starches extracted from corn and other plants.</p>                                                                                                                                                                                                                                                                                                                                                                                                                                                                                                              |
| <p><b>3) Processed foods</b></p> <p>Products manufactured with the addition of group 2 substances (e.g. salt, sugar, oil, and fats) to group 1 foods and alcoholic drinks produced by fermentation of group 1 foods such as beer, cider and wine.</p>                                                                                                                                                                                                                                                                                                                                                                                                                                                        | <p>Canned or bottled vegetables, fruits and legumes; salted or sugared nuts and seeds; salted, cured, or smoked meats; canned fish; fruits in syrup; cheeses and unpackaged freshly made breads.</p>                                                                                                                                                                                                                                                                                                                                                                                                                                 |
| <p><b>4) Ultra-processed foods</b></p> <p>Food and drink formulations made from several ingredients. Such ingredients include salt, sugar, oils, and fats but also other substances derived from foods but not commonly used as culinary ingredients (such as protein isolates, hydrogenated oils, modified starches) and additives used to imitate sensory quality of natural foods and freshly prepared dishes or to disguise unpalatable aspects of the final product (such as flavours, colours, sweeteners, emulsifiers). Alcoholic drinks produced by fermentation of group 1 foods followed by distillation of the resulting alcohol, such as whisky, gin, rum, vodka, are classified in group 4.</p> | <p>Carbonated drinks; sweet or savoury packaged snacks; confectionery; mass-produced packaged breads and buns; margarines and spreads; biscuits, pastries, cakes, and cake mixes; breakfast 'cereals', 'cereal' and 'energy' bars; 'energy' drinks; milk drinks, 'fruit' yoghurts and 'fruit' drinks; cocoa drinks; meat and chicken extracts and 'instant' sauces; ready to heat products including pre-prepared pies and pasta and pizza dishes; poultry and fish 'nuggets' and 'sticks', sausages, burgers, hot dogs, and other reconstituted meat products, and powdered and packaged 'instant' soups, noodles and desserts.</p> |

Adapted from Monteiro et al. (2016 and 2018).

Monteiro CA, Cannon G, Moubarac JC et al. (2018) The UN Decade of Nutrition, the NOVA food classification and the trouble with ultra-processing. *Public Health Nutr* 21, 5-17.

Monteiro CA, Cannon G, Levy RB, et al. NOVA. The star shines bright. *World Nutrition*. 2016;7(1-3):28-38.

Supplementary Table S2. Coding of subsidiary food groups from National Diet and Nutrition Survey according to NOVA classification.

| Subsidiary food group code | Subsidiary food group name                              | NOVA food group† |
|----------------------------|---------------------------------------------------------|------------------|
| 1C                         | Pizza                                                   | 4                |
| 1D                         | Pasta (manufactured products and ready meals)           | 4                |
| 1E                         | Pasta (other, including homemade dishes)                | *                |
| 1F                         | Rice (manufactured products and ready meals)            | 4                |
| 1G                         | Rice (other, including homemade dishes)                 | *                |
| 1R                         | Other cereals                                           | *                |
| 2R                         | White bread (not high fibre, not multiseed bread)       | 4                |
| 3R                         | Wholemeal bread                                         | 4                |
| 4R                         | Other bread                                             | 4                |
| 5R                         | High fibre breakfast cereals                            | 4                |
| 6R                         | Other breakfast cereals (not high fibre)                | 4                |
| 7A                         | Biscuits(manufactured/retail)                           | 4                |
| 7B                         | Biscuits (homemade)                                     | *                |
| 8B                         | Fruit pies (manufactured)                               | 4                |
| 8C                         | Fruit pies (homemade)                                   | *                |
| 8D                         | Buns cakes and pastries (manufactured)                  | 4                |
| 8E                         | Buns cakes and pastries (homemade)                      | *                |
| 9C                         | Cereal based milk puddings (manufactured)               | 4                |
| 9D                         | Cereal based milk puddings (homemade)                   | *                |
| 9E                         | Sponge puddings (manufactured)                          | 4                |
| 9F                         | Sponge puddings (homemade)                              | *                |
| 9G                         | Other cereal based puddings (manufactured)              | 4                |
| 9H                         | Other cereal based puddings (homemade)                  | *                |
| 10R                        | Whole milk                                              | 1                |
| 11R                        | Semi-skimmed milk                                       | 1                |
| 12R                        | Skimmed milk                                            | 1                |
| 13A                        | Infant formula                                          | 4                |
| 13B                        | Cream (including imitation cream)                       | *                |
| 13R                        | Other milk                                              | *                |
| 14A                        | Cottage cheese                                          | 3                |
| 14B                        | Cheddar cheese                                          | 3                |
| 14R                        | Other cheese                                            | *                |
| 15B                        | Yogurt                                                  | *                |
| 15C                        | Fromage frais and other dairy desserts (manufactured)   | 4                |
| 15D                        | Dairy desserts (homemade)                               | *                |
| 16C                        | Manufactured egg products, including ready meals        | 4                |
| 16D                        | Other eggs and egg dishes, including homemade           | *                |
| 17R                        | Butter                                                  | 2                |
| 18A                        | Polyunsaturated margarine                               | 4                |
| 18B                        | Polyunsaturated oils                                    | 2                |
| 19A                        | Polyunsaturated low fat spread                          | 4                |
| 19R                        | Low fat spread not polyunsaturated                      | 4                |
| 20A                        | Block margarine                                         | 4                |
| 20B                        | Soft margarine not polyunsaturated                      | 4                |
| 20C                        | Other cooking fats and oils not polyunsaturated         | 2                |
| 21A                        | Reduced fat spread (polyunsaturated)                    | 4                |
| 21B                        | Reduced fat spread (not polyunsaturated)                | 4                |
| 22A                        | Ready meals/meal centres based on bacon and ham         | 4                |
| 22B                        | Other bacon and ham (including homemade dishes)         | *                |
| 23A                        | Manufactured beef products (including ready meals)      | 4                |
| 23B                        | Other beef & veal (including homemade recipe dishes)    | *                |
| 24A                        | Manufactured lamb products (including ready meals)      | 4                |
| 24B                        | Other lamb (including homemade recipe dishes)           | *                |
| 25A                        | Manufactured pork products(including ready meals)       | 4                |
| 25B                        | Other pork (including homemade recipe dishes)           | *                |
| 26A                        | Manufactured coated chicken/turkey products             | 4                |
| 27A                        | Manufactured chicken products (including ready meals)   | 4                |
| 27B                        | Other chicken/turkey (including homemade recipe dishes) | *                |
| 28R                        | Liver and dishes                                        | *                |
| 29R                        | Burgers and kebabs purchased                            | 4                |
| 30A                        | Ready meals based on sausages                           | 4                |
| 30B                        | Other sausages (including homemade dishes)              | *                |
| 31A                        | Meat pies and pastries (manufactured)                   | 4                |
| 31B                        | Meat pies and pastries (homemade)                       | *                |

1  
2  
3  
4  
5  
6  
7  
8  
9  
10  
11  
12  
13  
14  
15  
16  
17  
18  
19  
20  
21  
22  
23  
24  
25  
26  
27  
28  
29  
30  
31  
32  
33  
34  
35  
36  
37  
38  
39  
40  
41  
42  
43  
44  
45  
46  
47  
48  
49  
50  
51  
52  
53  
54  
55  
56  
57  
58  
59  
60

|     |                                                               |    |
|-----|---------------------------------------------------------------|----|
| 32A | Other meat products (manufactured including ready meals)      | 4  |
| 32B | Other meat (including homemade recipe dishes)                 | *  |
| 33R | White fish coated or fried                                    | *  |
| 34C | Manufactured white fish products (including ready meals)      | 4  |
| 34D | Other white fish (including homemade dishes)                  | *  |
| 34E | Manufactured shellfish products (including ready meals)       | 4  |
| 34F | Other shellfish (including homemade dishes)                   | *  |
| 34G | Manufactured canned tuna products (including ready meals)     | *  |
| 34H | Other canned tuna (including homemade dishes)                 | *  |
| 35A | Manufactured oily fish products (including ready meals)       | 4  |
| 35B | Other oily fish (including homemade dishes)                   | *  |
| 36A | Carrots (raw)                                                 | 1  |
| 36B | Salad and other raw vegetables                                | *  |
| 36C | Tomatoes raw                                                  | 1  |
| 37A | Peas not raw                                                  | *  |
| 37B | Green beans not raw                                           | *  |
| 37C | Baked beans                                                   | 4  |
| 37D | Leafy green vegetables not raw                                | *  |
| 37E | Carrots not raw                                               | *  |
| 37F | Tomatoes not raw                                              | *  |
| 37I | Beans and pulses (including ready meal & homemade dishes)     | *  |
| 37K | Meat alternatives (including ready meals and homemade dishes) | 4  |
| 37L | Other manufactured vegetable products (including ready meals) | 4  |
| 37M | Other vegetables (including homemade dishes)                  | *  |
| 38A | Chips purchased including takeaway                            | 4  |
| 38C | Other manufactured potato products fried/baked                | 4  |
| 38D | Other fried/roast potatoes (including homemade dishes)        | *  |
| 39A | Other potato products and dishes(manufactured)                | 4  |
| 39B | Other potatoes (including homemade dishes)                    | *  |
| 40A | Apples and pears not canned                                   | *  |
| 40B | Citrus fruit not canned                                       | *  |
| 40C | Bananas                                                       | *  |
| 40D | Canned fruit in juice                                         | *  |
| 40E | Canned fruit in syrup                                         | 3  |
| 40R | Other fruit not canned                                        | *  |
| 41A | Sugar                                                         | *  |
| 41B | Preserves                                                     | 3  |
| 41R | Sweet spreads fillings and icing                              | 4  |
| 42R | Crisps and savoury snacks                                     | 4  |
| 43R | Sugar confectionery                                           | 4  |
| 44R | Chocolate confectionery                                       | 4  |
| 45R | Fruit juice                                                   | *  |
| 47A | Liqueurs                                                      | 4  |
| 47B | Spirits                                                       | 4  |
| 48A | Wine                                                          | 3  |
| 48B | Fortified wine                                                | 4  |
| 48C | Low alcohol and alcohol free wine                             | 3  |
| 49A | Beers and lagers                                              | 3  |
| 49B | Low alcohol & alcohol free beer & lager                       | 3  |
| 49C | Cider and Perry                                               | 4  |
| 49D | Low alcohol & alcohol free cider & Perry                      | 4  |
| 49E | Alcoholic soft drinks (Alcopops)                              | 4  |
| 50A | Beverages dry weight                                          | 4  |
| 50C | Soup (manufactured/retail)                                    | 4  |
| 50D | Soup (homemade)                                               | *  |
| 50E | Nutrition powders and drinks                                  | 4  |
| 50R | Savoury sauces pickles gravies & condiments                   | 4  |
| 51A | Coffee (made up weight)                                       | *  |
| 51B | Tea (made up)                                                 | *  |
| 51C | Herbal tea (made up)                                          | 1  |
| 51D | Bottled water still or carbonated                             | *  |
| 51R | Tap water only                                                | 1  |
| 52A | Commercial toddlers drinks                                    | 3  |
| 52R | Commercial toddlers foods                                     | 3  |
| 53R | Ice cream                                                     | 4  |
| 54A | Cod liver oil and other fish oils                             | ** |
| 54B | Evening primrose oil and other plant oils                     | ** |
| 54C | Single vitamins/minerals not Folic acid, iron, calcium        | ** |

|     |                                                                     |    |
|-----|---------------------------------------------------------------------|----|
| 54D | Folic acid                                                          | ** |
| 54E | Iron only or with vitamin C                                         | ** |
| 54F | Calcium only or with vitamin D                                      | ** |
| 54G | Vitamins (two or more including multivitamins) no minerals          | ** |
| 54H | Minerals (two or more including multimineral) no vitamins           | ** |
| 54I | Vitamins and minerals (including multivitamins & minerals)          | ** |
| 54J | Non-nutrient supplements (including herbal)                         | ** |
| 54K | Other nutrient supplements                                          | ** |
| 54L | Vitamin C                                                           | ** |
| 54M | Single vitamins/minerals not Folic acid, iron, calcium or vitamin C | ** |
| 54N | Cod liver oil and other fish oils (including with vitamins A, D, E) | ** |
| 54P | Multivitamins and/or minerals with omega ultra-processed            | ** |
| 55R | Artificial sweeteners                                               | 4  |
| 56R | Nuts and seeds                                                      | *  |
| 57A | Soft drinks not low calorie concentrated                            | 4  |
| 57B | Soft drinks not low calorie carbonated                              | 4  |
| 57C | Soft drinks not low calorie, ready to drink, still                  | 4  |
| 58A | Soft drinks low calorie concentrated                                | 4  |
| 58B | Soft drinks low calorie carbonated                                  | 4  |
| 58C | Soft drinks low calorie, ready to drink, still                      | 4  |
| 59R | Brown, granary and wheat germ bread                                 | 4  |
| 60R | 1% Milk                                                             | 1  |
| 61R | Smoothies                                                           | 1  |

† NOVA food groups defined as 1) unprocessed or minimally processed foods; 2) processed culinary ingredients; 3) processed foods; and 4) ultra-processed foods.

\* All foods within this subsidiary food group were individually coded (by food name).

\*\* Supplements were not included in any of the NOVA food groups.

Source: Rauber F, Louzada MLC, Steele EM, Millett C, Monteiro CA, Levy RB. Ultra-Processed Food Consumption and Chronic Non-Communicable Diseases-Related Dietary Nutrient Profile in the UK (2008–2014). *Nutrients* 2018, 10, 587; doi:10.3390/nu10050587.

**Supplementary table S3. Dietary content in free sugars according to age groups. UK population aged 1.5 years or over (2008–14).**

| Age groups            | % of total energy intake from free sugars |             | Individuals with $\geq 5\%$ of total energy intake from free sugars |              |              |
|-----------------------|-------------------------------------------|-------------|---------------------------------------------------------------------|--------------|--------------|
|                       | mean                                      | SE          | %                                                                   | 95%CI        |              |
| 1.5 - 10 years        | 14.00                                     | 0.14        | 97.16                                                               | 96.29        | 97.84        |
| 11 - 18 years         | 15.78                                     | 0.19        | 96.77                                                               | 95.62        | 97.62        |
| 19 - 64 years         | 11.93                                     | 0.14        | 88.82                                                               | 87.48        | 90.04        |
| $\geq 65$ years       | 11.36                                     | 0.23        | 87.62                                                               | 84.88        | 89.93        |
| <b>All age groups</b> | <b>12.44</b>                              | <b>0.10</b> | <b>90.34</b>                                                        | <b>89.39</b> | <b>91.21</b> |

**Supplementary table S4. Indicators of the dietary content in free sugars according to quintiles of the dietary contribution of NOVA food groups in the UK population aged 1.5 years or over (2008-14).**

| Dietary contribution (% of total energy intake)                                  |       |       |        | % of total energy intake from free sugars |      | Individuals with $\geq 5\%$ of total energy intake from free sugars |                   |                    |       |      | Individuals with $\geq 10\%$ of total energy intake from free sugars |                   |                    |       |      |
|----------------------------------------------------------------------------------|-------|-------|--------|-------------------------------------------|------|---------------------------------------------------------------------|-------------------|--------------------|-------|------|----------------------------------------------------------------------|-------------------|--------------------|-------|------|
| Quintile                                                                         | mean  | min   | max    | mean                                      | SE   | %                                                                   | PR*               | PRadj <sup>†</sup> | 95%CI |      | %                                                                    | PR*               | PRadj <sup>†</sup> | 95%CI |      |
| <b>Unprocessed or minimally processed foods + Processed culinary ingredients</b> |       |       |        |                                           |      |                                                                     |                   |                    |       |      |                                                                      |                   |                    |       |      |
| 1st                                                                              | 15.10 | 0.00  | 20.92  | 15.36                                     | 0.24 | 95.94                                                               | 1.00              | 1.00               | –     | –    | 77.42                                                                | 1.00              | 1.00               | –     | –    |
| 2nd                                                                              | 24.90 | 20.92 | 28.43  | 13.44                                     | 0.22 | 94.28                                                               | 0.98              | 0.99               | 0.97  | 1.01 | 68.55                                                                | 0.89              | 0.92               | 0.86  | 0.97 |
| 3rd                                                                              | 31.68 | 28.43 | 34.96  | 12.62                                     | 0.21 | 91.92                                                               | 0.96              | 0.97               | 0.95  | 1.00 | 65.09                                                                | 0.84              | 0.89               | 0.84  | 0.95 |
| 4th                                                                              | 39.08 | 34.97 | 43.88  | 11.46                                     | 0.21 | 89.70                                                               | 0.93              | 0.96               | 0.93  | 0.98 | 55.09                                                                | 0.71              | 0.77               | 0.72  | 0.83 |
| 5th                                                                              | 53.57 | 43.88 | 91.90  | 10.32 <sup>‡</sup>                        | 0.19 | 82.41                                                               | 0.86              | 0.89               | 0.86  | 0.92 | 46.36                                                                | 0.60 <sup>‡</sup> | 0.67 <sup>‡</sup>  | 0.61  | 0.73 |
| <b>Processed foods</b>                                                           |       |       |        |                                           |      |                                                                     |                   |                    |       |      |                                                                      |                   |                    |       |      |
| 1st                                                                              | 0.32  | 0.00  | 1.33   | 13.53                                     | 0.29 | 87.19                                                               | 1.00              | 1.00               | –     | –    | 64.14                                                                | 1.00              | 1.00               | –     | –    |
| 2nd                                                                              | 2.55  | 1.34  | 3.79   | 13.48                                     | 0.24 | 92.34                                                               | 1.06              | 1.06               | 1.03  | 1.10 | 67.93                                                                | 1.06              | 1.08               | 1.01  | 1.16 |
| 3rd                                                                              | 5.28  | 3.79  | 6.82   | 12.83                                     | 0.19 | 92.39                                                               | 1.06              | 1.07               | 1.03  | 1.10 | 67.10                                                                | 1.05              | 1.08               | 1.00  | 1.16 |
| 4th                                                                              | 9.28  | 6.82  | 12.03  | 11.89                                     | 0.20 | 90.61                                                               | 1.04              | 1.06               | 1.02  | 1.09 | 58.87                                                                | 0.92              | 0.98               | 0.91  | 1.06 |
| 5th                                                                              | 19.54 | 12.04 | 65.22  | 11.38 <sup>‡</sup>                        | 0.19 | 89.40                                                               | 1.03              | 1.04               | 1.01  | 1.08 | 53.70                                                                | 0.84 <sup>‡</sup> | 0.91 <sup>‡</sup>  | 0.84  | 0.98 |
| <b>Ultra-processed foods</b>                                                     |       |       |        |                                           |      |                                                                     |                   |                    |       |      |                                                                      |                   |                    |       |      |
| 1st                                                                              | 34.89 | 1.82  | 43.69  | 9.94                                      | 0.22 | 80.50                                                               | 1.00              | 1.00               | –     | –    | 41.87                                                                | 1.00              | 1.00               | –     | –    |
| 2nd                                                                              | 48.74 | 43.69 | 53.04  | 11.34                                     | 0.20 | 89.16                                                               | 1.11              | 1.10               | 1.05  | 1.15 | 56.35                                                                | 1.35              | 1.31               | 1.18  | 1.46 |
| 3rd                                                                              | 57.06 | 53.05 | 60.96  | 12.16                                     | 0.21 | 92.65                                                               | 1.15              | 1.14               | 1.09  | 1.18 | 60.76                                                                | 1.45              | 1.39               | 1.25  | 1.54 |
| 4th                                                                              | 65.37 | 60.96 | 70.14  | 13.38                                     | 0.21 | 94.08                                                               | 1.17              | 1.15               | 1.10  | 1.19 | 70.18                                                                | 1.68              | 1.55               | 1.41  | 1.72 |
| 5th                                                                              | 78.06 | 70.14 | 100.00 | 15.41 <sup>‡</sup>                        | 0.21 | 95.30                                                               | 1.18 <sup>‡</sup> | 1.15 <sup>‡</sup>  | 1.10  | 1.19 | 77.20                                                                | 1.84 <sup>‡</sup> | 1.64 <sup>‡</sup>  | 1.48  | 1.81 |

\*PR=Prevalence ratios estimated using Poisson regression.

<sup>†</sup>PRadj=Prevalence ratios adjusted for sex, age, race/ethnicity (White, Mixed ethnic group, Black or Black British, Asian or Asian British and Other race), region, survey year, and household income.

<sup>‡</sup>Significant linear trend across all quintiles ( $p \leq 0.01$ ).

Supplementary figure S1. Distribution of total energy intake by age groups, including outliers. UK population (2008-14).

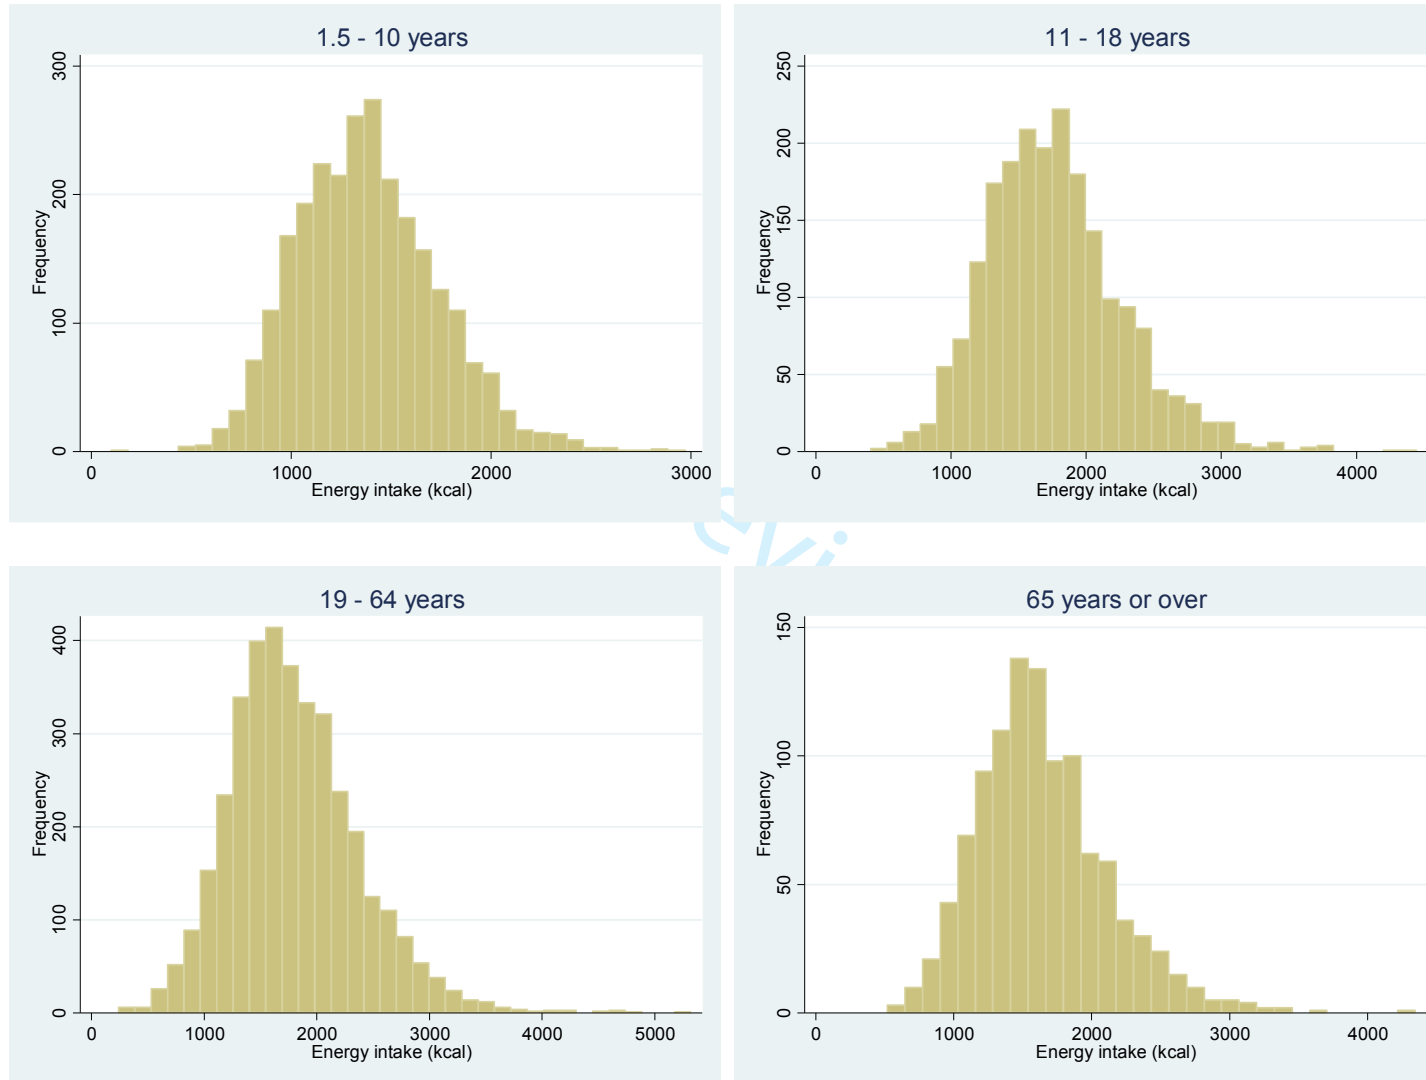

Supplementary figure S2. Percentage of excessive free sugar intake that would be avoided under two possible scenarios regarding the consumption of the main dietary sources of free sugar. UK population aged 1.5 years or over (2008–14).

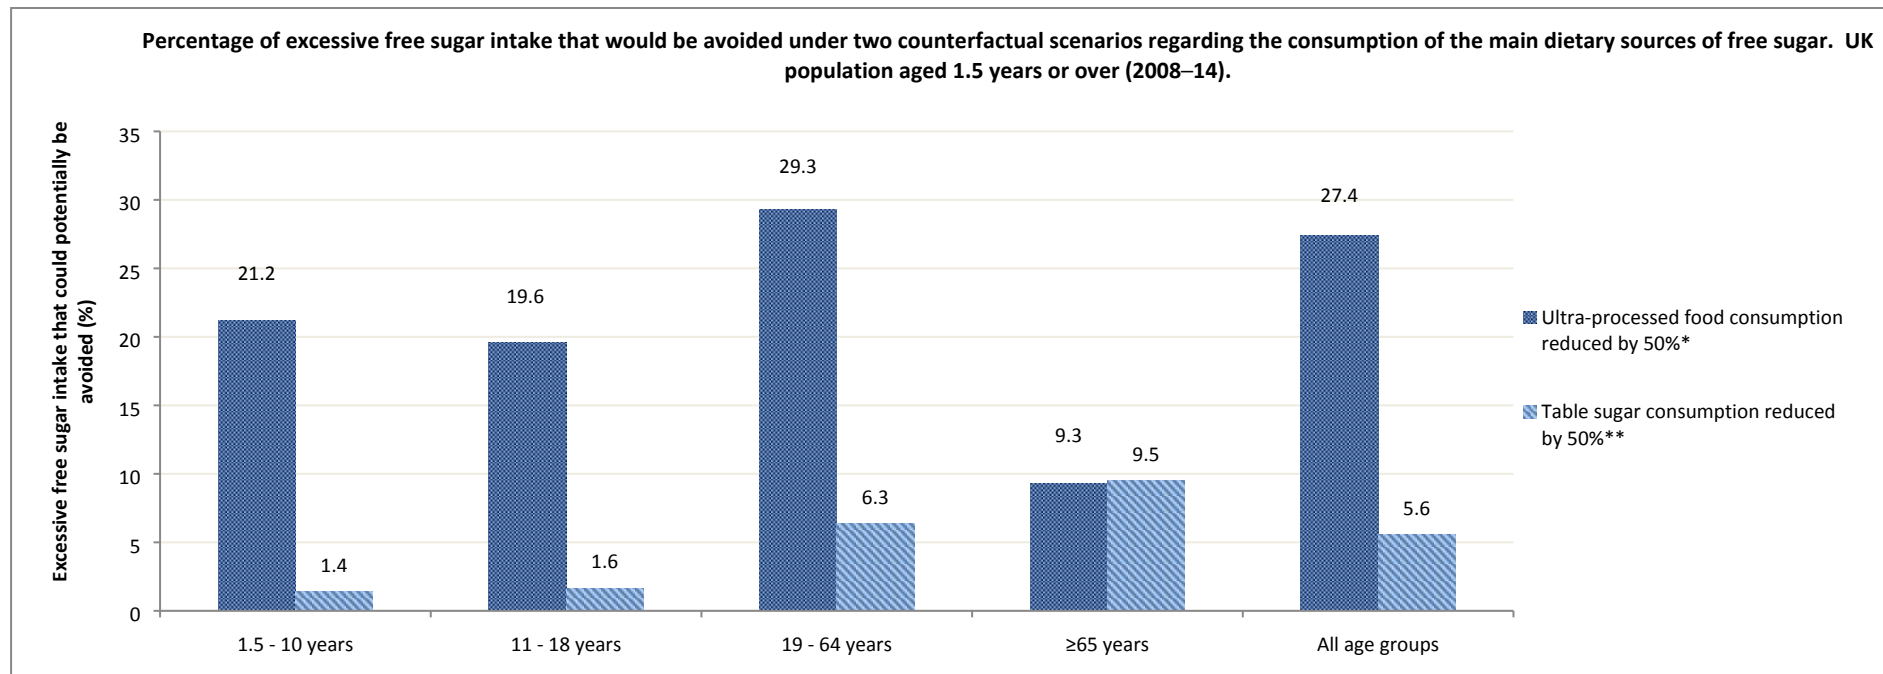

\* The consumption of ultra-processed food was reduced by 50% of the average intake for each age group (1.5-10y: from 63.5 to 28.4% of total energy intake; 11-18y: from 68 to 34%; 19-64y: from 54.8 to 27.4%; ≥65y: from 52.9 to 26.4%; all age groups: from 56.8 to 28.4%).

\*\* The consumption of table sugar (including honey, molasses, maple syrup) was reduced by 50% of the average intake for each age group (1.5-10y: from 0.48 to 0.24% of total energy intake; 11-18y: from 1.0 to 0.5%; 19-64y: from 1.8 to 0.9%; ≥65y: from 1.9 to 0.9%; all age groups: from 1.6 to 0.8%).



STROBE Statement—Checklist of items that should be included in reports of *cross-sectional studies*

|                              | Item No | Recommendation                                                                                                                                                                                               | Page No |
|------------------------------|---------|--------------------------------------------------------------------------------------------------------------------------------------------------------------------------------------------------------------|---------|
| <b>Title and abstract</b>    | 1       | (a) Indicate the study's design with a commonly used term in the title or the abstract                                                                                                                       | 1, 2    |
|                              |         | (b) Provide in the abstract an informative and balanced summary of what was done and what was found                                                                                                          | 1, 2    |
| <b>Introduction</b>          |         |                                                                                                                                                                                                              |         |
| Background/rationale         | 2       | Explain the scientific background and rationale for the investigation being reported                                                                                                                         | 4       |
| Objectives                   | 3       | State specific objectives, including any prespecified hypotheses                                                                                                                                             | 4, 5    |
| <b>Methods</b>               |         |                                                                                                                                                                                                              |         |
| Study design                 | 4       | Present key elements of study design early in the paper                                                                                                                                                      | 5       |
| Setting                      | 5       | Describe the setting, locations, and relevant dates, including periods of recruitment, exposure, follow-up, and data collection                                                                              | 5       |
| Participants                 | 6       | (a) Give the eligibility criteria, and the sources and methods of selection of participants                                                                                                                  | 5       |
| Variables                    | 7       | Clearly define all outcomes, exposures, predictors, potential confounders, and effect modifiers. Give diagnostic criteria, if applicable                                                                     | 6-9     |
| Data sources/<br>measurement | 8*      | For each variable of interest, give sources of data and details of methods of assessment (measurement). Describe comparability of assessment methods if there is more than one group                         | 6-9     |
| Bias                         | 9       | Describe any efforts to address potential sources of bias                                                                                                                                                    | 6,7,9   |
| Study size                   | 10      | Explain how the study size was arrived at                                                                                                                                                                    | 5       |
| Quantitative variables       | 11      | Explain how quantitative variables were handled in the analyses. If applicable, describe which groupings were chosen and why                                                                                 | 7,8     |
| Statistical methods          | 12      | (a) Describe all statistical methods, including those used to control for confounding                                                                                                                        | 8-9     |
|                              |         | (b) Describe any methods used to examine subgroups and interactions                                                                                                                                          | 8,9     |
|                              |         | (c) Explain how missing data were addressed                                                                                                                                                                  | 8       |
|                              |         | (d) If applicable, describe analytical methods taking account of sampling strategy                                                                                                                           | 9       |
|                              |         | (e) Describe any sensitivity analyses                                                                                                                                                                        | NA      |
| <b>Results</b>               |         |                                                                                                                                                                                                              |         |
| Participants                 | 13*     | (a) Report numbers of individuals at each stage of study—eg numbers potentially eligible, examined for eligibility, confirmed eligible, included in the study, completing follow-up, and analysed            | 8       |
|                              |         | (b) Give reasons for non-participation at each stage                                                                                                                                                         | NA      |
|                              |         | (c) Consider use of a flow diagram                                                                                                                                                                           | NA      |
| Descriptive data             | 14*     | (a) Give characteristics of study participants (eg demographic, clinical, social) and information on exposures and potential confounders                                                                     | NA      |
|                              |         | (b) Indicate number of participants with missing data for each variable of interest                                                                                                                          | 8       |
| Outcome data                 | 15*     | Report numbers of outcome events or summary measures                                                                                                                                                         | 10      |
| Main results                 | 16      | (a) Give unadjusted estimates and, if applicable, confounder-adjusted estimates and their precision (eg, 95% confidence interval). Make clear which confounders were adjusted for and why they were included | 12-16   |

|                          |    |                                                                                                                                                                            |       |
|--------------------------|----|----------------------------------------------------------------------------------------------------------------------------------------------------------------------------|-------|
|                          |    | (b) Report category boundaries when continuous variables were categorized                                                                                                  |       |
|                          |    | (c) If relevant, consider translating estimates of relative risk into absolute risk for a meaningful time period                                                           | NA    |
| Other analyses           | 17 | Report other analyses done—eg analyses of subgroups and interactions, and sensitivity analyses                                                                             | 12    |
| <b>Discussion</b>        |    |                                                                                                                                                                            |       |
| Key results              | 18 | Summarise key results with reference to study objectives                                                                                                                   | 17    |
| Limitations              | 19 | Discuss limitations of the study, taking into account sources of potential bias or imprecision. Discuss both direction and magnitude of any potential bias                 | 18,19 |
| Interpretation           | 20 | Give a cautious overall interpretation of results considering objectives, limitations, multiplicity of analyses, results from similar studies, and other relevant evidence | 19    |
| Generalisability         | 21 | Discuss the generalisability (external validity) of the study results                                                                                                      | 17,18 |
| <b>Other information</b> |    |                                                                                                                                                                            |       |
| Funding                  | 22 | Give the source of funding and the role of the funders for the present study and, if applicable, for the original study on which the present article is based              | 20    |

\*Give information separately for exposed and unexposed groups.

**Note:** An Explanation and Elaboration article discusses each checklist item and gives methodological background and published examples of transparent reporting. The STROBE checklist is best used in conjunction with this article (freely available on the Web sites of PLoS Medicine at <http://www.plosmedicine.org/>, Annals of Internal Medicine at <http://www.annals.org/>, and Epidemiology at <http://www.epidem.com/>). Information on the STROBE Initiative is available at [www.strobe-statement.org](http://www.strobe-statement.org).
