# Supplementary material for: Ultra-processed foods and excessive free sugar intake in the UK: a nationally representative cross-sectional study
Source: PubMed Central journal article supplement — BMJ Open. 2019 Oct 28;9(10):e027546. doi: 10.1136/bmjopen-2018-027546 (PMC6830631; doi:10.1136/bmjopen-2018-027546), 2019-10-28
Supplement: bmjopen-2018-027546supp001.pdf [file bmjopen-2018-027546supp001.pdf]

**Ultra-processed foods and excessive free sugar intake in the UK: a nationally representative cross-sectional study.**

Fernanda Rauber <sup>1,2</sup>, Maria Laura da Costa Louzada <sup>1,3</sup>, Eurídice Martínez Steele <sup>1,2</sup>, Leandro Fórnias Machado de Rezende <sup>1,4</sup>, Christopher Millett <sup>1,5</sup>, Carlos Augusto Monteiro <sup>1,2</sup>, Renata Bertazzi Levy <sup>1,6</sup>

<sup>1</sup> Núcleo de Pesquisas Epidemiológicas em Nutrição e Saúde, Universidade de São Paulo, São Paulo, Brasil.

<sup>2</sup> Departamento de Nutrição, Faculdade de Saúde Pública, Universidade de São Paulo, São Paulo, Brasil.

<sup>3</sup> Departamento de Políticas Públicas e Saúde Coletiva, Universidade Federal de São Paulo, São Paulo, Brasil.

<sup>4</sup> Universidade Federal de São Paulo. Escola Paulista de Medicina. Departamento de Medicina Preventiva. São Paulo - SP, Brasil.

<sup>5</sup> Public Health Policy Evaluation Unit, School of Public Health, Imperial College London, London, United Kingdom.

<sup>6</sup> Departamento de Medicina Preventiva, Faculdade de Medicina FMUSP, Universidade de São Paulo, São Paulo, Brasil.

**Supplementary table S1. The Nova food classification system\***

| Food groups                                                                                                                                                                                                                                                                                                                                                                                                                                                                                                                                                                                                                                                                                                  | Examples                                                                                                                                                                                                                                                                                                                                                                                                                                                                                                                                                                                                                             |
|--------------------------------------------------------------------------------------------------------------------------------------------------------------------------------------------------------------------------------------------------------------------------------------------------------------------------------------------------------------------------------------------------------------------------------------------------------------------------------------------------------------------------------------------------------------------------------------------------------------------------------------------------------------------------------------------------------------|--------------------------------------------------------------------------------------------------------------------------------------------------------------------------------------------------------------------------------------------------------------------------------------------------------------------------------------------------------------------------------------------------------------------------------------------------------------------------------------------------------------------------------------------------------------------------------------------------------------------------------------|
| <p><b>1) Unprocessed foods or minimally processed foods</b></p> <p>Natural foods altered by methods such as freezing, pasteurization, fermentation, removal of inedible or unwanted parts, grinding, and other methods that do not include the addition of substances such as salt, sugar and/or oils or fats.</p>                                                                                                                                                                                                                                                                                                                                                                                           | <p>Fresh, dry or frozen fruits or vegetables; legumes; grains, roots and tubers, flours and pasta; pasteurized or power plain milk and plain yogurt; fresh or frozen meat (fish, poultry and red meat); eggs; nuts and seeds; fungi; fresh or pasteurised fruit or vegetable juices without added sugar, sweeteners or flavours; tea, coffee and drinking water.</p>                                                                                                                                                                                                                                                                 |
| <p><b>2) Processed culinary ingredients</b></p> <p>Substances obtained directly from group 1 foods or from nature by processes that include pressing, refining, grinding, milling, and drying, and consumed in combination with group 1 foods in freshly prepared dishes or drinks.</p>                                                                                                                                                                                                                                                                                                                                                                                                                      | <p>Salt; sugar, honey and molasses; vegetable oils; butter and lard; starches extracted from corn and other plants.</p>                                                                                                                                                                                                                                                                                                                                                                                                                                                                                                              |
| <p><b>3) Processed foods</b></p> <p>Products manufactured with the addition of group 2 substances (e.g. salt, sugar, oil, and fats) to group 1 foods and alcoholic drinks produced by fermentation of group 1 foods such as beer, cider and wine.</p>                                                                                                                                                                                                                                                                                                                                                                                                                                                        | <p>Canned or bottled vegetables, fruits and legumes; salted or sugared nuts and seeds; salted, cured, or smoked meats; canned fish; fruits in syrup; cheeses and unpackaged freshly made breads.</p>                                                                                                                                                                                                                                                                                                                                                                                                                                 |
| <p><b>4) Ultra-processed foods</b></p> <p>Food and drink formulations made from several ingredients. Such ingredients include salt, sugar, oils, and fats but also other substances derived from foods but not commonly used as culinary ingredients (such as protein isolates, hydrogenated oils, modified starches) and additives used to imitate sensory quality of natural foods and freshly prepared dishes or to disguise unpalatable aspects of the final product (such as flavours, colours, sweeteners, emulsifiers). Alcoholic drinks produced by fermentation of group 1 foods followed by distillation of the resulting alcohol, such as whisky, gin, rum, vodka, are classified in group 4.</p> | <p>Carbonated drinks; sweet or savoury packaged snacks; confectionery; mass-produced packaged breads and buns; margarines and spreads; biscuits, pastries, cakes, and cake mixes; breakfast 'cereals', 'cereal' and 'energy' bars; 'energy' drinks; milk drinks, 'fruit' yoghurts and 'fruit' drinks; cocoa drinks; meat and chicken extracts and 'instant' sauces; ready to heat products including pre-prepared pies and pasta and pizza dishes; poultry and fish 'nuggets' and 'sticks', sausages, burgers, hot dogs, and other reconstituted meat products, and powdered and packaged 'instant' soups, noodles and desserts.</p> |

Adapted from Monteiro et al. (2016 and 2018).

Monteiro CA, Cannon G, Moubarac JC et al. (2018) The UN Decade of Nutrition, the NOVA food classification and the trouble with ultra-processing. *Public Health Nutr* 21, 5-17.

Monteiro CA, Cannon G, Levy RB, et al. NOVA. The star shines bright. *World Nutrition*. 2016;7(1-3):28-38.

Supplementary Table S2. Coding of subsidiary food groups from National Diet and Nutrition Survey according to NOVA classification.

| Subsidiary food group code | Subsidiary food group name                               | NOVA food group† |
|----------------------------|----------------------------------------------------------|------------------|
| 1C                         | Pizza                                                    | 4                |
| 1D                         | Pasta (manufactured products and ready meals)            | 4                |
| 1E                         | Pasta (other, including homemade dishes)                 | *                |
| 1F                         | Rice (manufactured products and ready meals)             | 4                |
| 1G                         | Rice (other, including homemade dishes)                  | *                |
| 1R                         | Other cereals                                            | *                |
| 2R                         | White bread (not high fibre, not multiseed bread)        | 4                |
| 3R                         | Wholemeal bread                                          | 4                |
| 4R                         | Other bread                                              | 4                |
| 5R                         | High fibre breakfast cereals                             | 4                |
| 6R                         | Other breakfast cereals (not high fibre)                 | 4                |
| 7A                         | Biscuits(manufactured/retail)                            | 4                |
| 7B                         | Biscuits (homemade)                                      | *                |
| 8B                         | Fruit pies (manufactured)                                | 4                |
| 8C                         | Fruit pies (homemade)                                    | *                |
| 8D                         | Buns cakes and pastries (manufactured)                   | 4                |
| 8E                         | Buns cakes and pastries (homemade)                       | *                |
| 9C                         | Cereal based milk puddings (manufactured)                | 4                |
| 9D                         | Cereal based milk puddings (homemade)                    | *                |
| 9E                         | Sponge puddings (manufactured)                           | 4                |
| 9F                         | Sponge puddings (homemade)                               | *                |
| 9G                         | Other cereal based puddings (manufactured)               | 4                |
| 9H                         | Other cereal based puddings (homemade)                   | *                |
| 10R                        | Whole milk                                               | 1                |
| 11R                        | Semi-skimmed milk                                        | 1                |
| 12R                        | Skimmed milk                                             | 1                |
| 13A                        | Infant formula                                           | 4                |
| 13B                        | Cream (including imitation cream)                        | *                |
| 13R                        | Other milk                                               | *                |
| 14A                        | Cottage cheese                                           | 3                |
| 14B                        | Cheddar cheese                                           | 3                |
| 14R                        | Other cheese                                             | *                |
| 15B                        | Yogurt                                                   | *                |
| 15C                        | Fromage frais and other dairy desserts (manufactured)    | 4                |
| 15D                        | Dairy desserts (homemade)                                | *                |
| 16C                        | Manufactured egg products, including ready meals         | 4                |
| 16D                        | Other eggs and egg dishes, including homemade            | *                |
| 17R                        | Butter                                                   | 2                |
| 18A                        | Polyunsaturated margarine                                | 4                |
| 18B                        | Polyunsaturated oils                                     | 2                |
| 19A                        | Polyunsaturated low fat spread                           | 4                |
| 19R                        | Low fat spread not polyunsaturated                       | 4                |
| 20A                        | Block margarine                                          | 4                |
| 20B                        | Soft margarine not polyunsaturated                       | 4                |
| 20C                        | Other cooking fats and oils not polyunsaturated          | 2                |
| 21A                        | Reduced fat spread (polyunsaturated)                     | 4                |
| 21B                        | Reduced fat spread (not polyunsaturated)                 | 4                |
| 22A                        | Ready meals/meal centres based on bacon and ham          | 4                |
| 22B                        | Other bacon and ham (including homemade dishes)          | *                |
| 23A                        | Manufactured beef products (including ready meals)       | 4                |
| 23B                        | Other beef & veal (including homemade recipe dishes)     | *                |
| 24A                        | Manufactured lamb products (including ready meals)       | 4                |
| 24B                        | Other lamb (including homemade recipe dishes)            | *                |
| 25A                        | Manufactured pork products(including ready meals)        | 4                |
| 25B                        | Other pork (including homemade recipe dishes)            | *                |
| 26A                        | Manufactured coated chicken/turkey products              | 4                |
| 27A                        | Manufactured chicken products (including ready meals)    | 4                |
| 27B                        | Other chicken/turkey (including homemade recipe dishes)  | *                |
| 28R                        | Liver and dishes                                         | *                |
| 29R                        | Burgers and kebabs purchased                             | 4                |
| 30A                        | Ready meals based on sausages                            | 4                |
| 30B                        | Other sausages (including homemade dishes)               | *                |
| 31A                        | Meat pies and pastries (manufactured)                    | 4                |
| 31B                        | Meat pies and pastries (homemade)                        | *                |
| 32A                        | Other meat products (manufactured including ready meals) | 4                |

|     |                                                               |    |
|-----|---------------------------------------------------------------|----|
| 32B | Other meat (including homemade recipe dishes)                 | *  |
| 33R | White fish coated or fried                                    | *  |
| 34C | Manufactured white fish products (including ready meals)      | 4  |
| 34D | Other white fish (including homemade dishes)                  | *  |
| 34E | Manufactured shellfish products (including ready meals)       | 4  |
| 34F | Other shellfish (including homemade dishes)                   | *  |
| 34G | Manufactured canned tuna products (including ready meals)     | *  |
| 34H | Other canned tuna (including homemade dishes)                 | *  |
| 35A | Manufactured oily fish products (including ready meals)       | 4  |
| 35B | Other oily fish (including homemade dishes)                   | *  |
| 36A | Carrots (raw)                                                 | 1  |
| 36B | Salad and other raw vegetables                                | *  |
| 36C | Tomatoes raw                                                  | 1  |
| 37A | Peas not raw                                                  | *  |
| 37B | Green beans not raw                                           | *  |
| 37C | Baked beans                                                   | 4  |
| 37D | Leafy green vegetables not raw                                | *  |
| 37E | Carrots not raw                                               | *  |
| 37F | Tomatoes not raw                                              | *  |
| 37I | Beans and pulses (including ready meal & homemade dishes)     | *  |
| 37K | Meat alternatives (including ready meals and homemade dishes) | 4  |
| 37L | Other manufactured vegetable products (including ready meals) | 4  |
| 37M | Other vegetables (including homemade dishes)                  | *  |
| 38A | Chips purchased including takeaway                            | 4  |
| 38C | Other manufactured potato products fried/baked                | 4  |
| 38D | Other fried/roast potatoes (including homemade dishes)        | *  |
| 39A | Other potato products and dishes(manufactured)                | 4  |
| 39B | Other potatoes (including homemade dishes)                    | *  |
| 40A | Apples and pears not canned                                   | *  |
| 40B | Citrus fruit not canned                                       | *  |
| 40C | Bananas                                                       | *  |
| 40D | Canned fruit in juice                                         | *  |
| 40E | Canned fruit in syrup                                         | 3  |
| 40R | Other fruit not canned                                        | *  |
| 41A | Sugar                                                         | *  |
| 41B | Preserves                                                     | 3  |
| 41R | Sweet spreads fillings and icing                              | 4  |
| 42R | Crisps and savoury snacks                                     | 4  |
| 43R | Sugar confectionery                                           | 4  |
| 44R | Chocolate confectionery                                       | 4  |
| 45R | Fruit juice                                                   | *  |
| 47A | Liqueurs                                                      | 4  |
| 47B | Spirits                                                       | 4  |
| 48A | Wine                                                          | 3  |
| 48B | Fortified wine                                                | 4  |
| 48C | Low alcohol and alcohol free wine                             | 3  |
| 49A | Beers and lagers                                              | 3  |
| 49B | Low alcohol & alcohol free beer & lager                       | 3  |
| 49C | Cider and Perry                                               | 4  |
| 49D | Low alcohol & alcohol free cider & Perry                      | 4  |
| 49E | Alcoholic soft drinks (Alcopops)                              | 4  |
| 50A | Beverages dry weight                                          | 4  |
| 50C | Soup (manufactured/retail)                                    | 4  |
| 50D | Soup (homemade)                                               | *  |
| 50E | Nutrition powders and drinks                                  | 4  |
| 50R | Savoury sauces pickles gravies & condiments                   | 4  |
| 51A | Coffee (made up weight)                                       | *  |
| 51B | Tea (made up)                                                 | *  |
| 51C | Herbal tea (made up)                                          | 1  |
| 51D | Bottled water still or carbonated                             | *  |
| 51R | Tap water only                                                | 1  |
| 52A | Commercial toddlers drinks                                    | 3  |
| 52R | Commercial toddlers foods                                     | 3  |
| 53R | Ice cream                                                     | 4  |
| 54A | Cod liver oil and other fish oils                             | ** |
| 54B | Evening primrose oil and other plant oils                     | ** |
| 54C | Single vitamins/minerals not Folic acid, iron, calcium        | ** |
| 54D | Folic acid                                                    | ** |

|     |                                                                     |    |
|-----|---------------------------------------------------------------------|----|
| 54E | Iron only or with vitamin C                                         | ** |
| 54F | Calcium only or with vitamin D                                      | ** |
| 54G | Vitamins (two or more including multivitamins) no minerals          | ** |
| 54H | Minerals (two or more including multimineral) no vitamins           | ** |
| 54I | Vitamins and minerals (including multivitamins & minerals)          | ** |
| 54J | Non-nutrient supplements (including herbal)                         | ** |
| 54K | Other nutrient supplements                                          | ** |
| 54L | Vitamin C                                                           | ** |
| 54M | Single vitamins/minerals not Folic acid, iron, calcium or vitamin C | ** |
| 54N | Cod liver oil and other fish oils (including with vitamins A, D, E) | ** |
| 54P | Multivitamins and/or minerals with omega ultra-processed            | ** |
| 55R | Artificial sweeteners                                               | 4  |
| 56R | Nuts and seeds                                                      | *  |
| 57A | Soft drinks not low calorie concentrated                            | 4  |
| 57B | Soft drinks not low calorie carbonated                              | 4  |
| 57C | Soft drinks not low calorie, ready to drink, still                  | 4  |
| 58A | Soft drinks low calorie concentrated                                | 4  |
| 58B | Soft drinks low calorie carbonated                                  | 4  |
| 58C | Soft drinks low calorie, ready to drink, still                      | 4  |
| 59R | Brown, granary and wheat germ bread                                 | 4  |
| 60R | 1% Milk                                                             | 1  |
| 61R | Smoothies                                                           | 1  |

† NOVA food groups defined as 1) unprocessed or minimally processed foods; 2) processed culinary ingredients; 3) processed foods; and 4) ultra-processed foods.

\* All foods within this subsidiary food group were individually coded (by food name).

\*\* Supplements were not included in any of the NOVA food groups.

Source: Rauber F, Louzada MLC, Steele EM, Millett C, Monteiro CA, Levy RB. Ultra-Processed Food Consumption and Chronic Non-Communicable Diseases-Related Dietary Nutrient Profile in the UK (2008–2014). *Nutrients* 2018, 10, 587; doi:10.3390/nu10050587.

**Supplementary table S3. Dietary content in free sugars according to age groups. UK population aged 1.5 years or over (2008–14).**

| Age groups            | % of total energy intake from free sugars |             | Individuals with $\geq 5\%$ of total energy intake from free sugars |              |              |
|-----------------------|-------------------------------------------|-------------|---------------------------------------------------------------------|--------------|--------------|
|                       | mean                                      | SE          | %                                                                   | 95%CI        |              |
| 1.5 - 10 years        | 14.00                                     | 0.14        | 97.16                                                               | 96.29        | 97.84        |
| 11 - 18 years         | 15.78                                     | 0.19        | 96.77                                                               | 95.62        | 97.62        |
| 19 - 64 years         | 11.93                                     | 0.14        | 88.82                                                               | 87.48        | 90.04        |
| $\geq 65$ years       | 11.36                                     | 0.23        | 87.62                                                               | 84.88        | 89.93        |
| <b>All age groups</b> | <b>12.44</b>                              | <b>0.10</b> | <b>90.34</b>                                                        | <b>89.39</b> | <b>91.21</b> |

**Supplementary table S4. Indicators of the dietary content in free sugars according to quintiles of the dietary contribution of NOVA food groups in the UK population aged 1.5 years or over (2008-14).**

| Dietary contribution (% of total energy intake)                                  |       |       |        | % of total energy intake from free sugars |      | Individuals with $\geq 5\%$ of total energy intake from free sugars |                   |                    |       |      | Individuals with $\geq 10\%$ of total energy intake from free sugars |                   |                    |       |      |
|----------------------------------------------------------------------------------|-------|-------|--------|-------------------------------------------|------|---------------------------------------------------------------------|-------------------|--------------------|-------|------|----------------------------------------------------------------------|-------------------|--------------------|-------|------|
| Quintile                                                                         | mean  | min   | max    | mean                                      | SE   | %                                                                   | PR*               | PRadj <sup>i</sup> | 95%CI |      | %                                                                    | PR*               | PRadj <sup>i</sup> | 95%CI |      |
| <b>Unprocessed or minimally processed foods + Processed culinary ingredients</b> |       |       |        |                                           |      |                                                                     |                   |                    |       |      |                                                                      |                   |                    |       |      |
| 1st                                                                              | 15.10 | 0.00  | 20.92  | 15.36                                     | 0.24 | 95.94                                                               | 1.00              | 1.00               | –     | –    | 77.42                                                                | 1.00              | 1.00               | –     | –    |
| 2nd                                                                              | 24.90 | 20.92 | 28.43  | 13.44                                     | 0.22 | 94.28                                                               | 0.98              | 0.99               | 0.97  | 1.01 | 68.55                                                                | 0.89              | 0.92               | 0.86  | 0.97 |
| 3rd                                                                              | 31.68 | 28.43 | 34.96  | 12.62                                     | 0.21 | 91.92                                                               | 0.96              | 0.97               | 0.95  | 1.00 | 65.09                                                                | 0.84              | 0.89               | 0.84  | 0.95 |
| 4th                                                                              | 39.08 | 34.97 | 43.88  | 11.46                                     | 0.21 | 89.70                                                               | 0.93              | 0.96               | 0.93  | 0.98 | 55.09                                                                | 0.71              | 0.77               | 0.72  | 0.83 |
| 5th                                                                              | 53.57 | 43.88 | 91.90  | 10.32 <sup>‡</sup>                        | 0.19 | 82.41                                                               | 0.86              | 0.89               | 0.86  | 0.92 | 46.36                                                                | 0.60 <sup>‡</sup> | 0.67 <sup>‡</sup>  | 0.61  | 0.73 |
| <b>Processed foods</b>                                                           |       |       |        |                                           |      |                                                                     |                   |                    |       |      |                                                                      |                   |                    |       |      |
| 1st                                                                              | 0.32  | 0.00  | 1.33   | 13.53                                     | 0.29 | 87.19                                                               | 1.00              | 1.00               | –     | –    | 64.14                                                                | 1.00              | 1.00               | –     | –    |
| 2nd                                                                              | 2.55  | 1.34  | 3.79   | 13.48                                     | 0.24 | 92.34                                                               | 1.06              | 1.06               | 1.03  | 1.10 | 67.93                                                                | 1.06              | 1.08               | 1.01  | 1.16 |
| 3rd                                                                              | 5.28  | 3.79  | 6.82   | 12.83                                     | 0.19 | 92.39                                                               | 1.06              | 1.07               | 1.03  | 1.10 | 67.10                                                                | 1.05              | 1.08               | 1.00  | 1.16 |
| 4th                                                                              | 9.28  | 6.82  | 12.03  | 11.89                                     | 0.20 | 90.61                                                               | 1.04              | 1.06               | 1.02  | 1.09 | 58.87                                                                | 0.92              | 0.98               | 0.91  | 1.06 |
| 5th                                                                              | 19.54 | 12.04 | 65.22  | 11.38 <sup>‡</sup>                        | 0.19 | 89.40                                                               | 1.03              | 1.04               | 1.01  | 1.08 | 53.70                                                                | 0.84 <sup>‡</sup> | 0.91 <sup>‡</sup>  | 0.84  | 0.98 |
| <b>Ultra-processed foods</b>                                                     |       |       |        |                                           |      |                                                                     |                   |                    |       |      |                                                                      |                   |                    |       |      |
| 1st                                                                              | 34.89 | 1.82  | 43.69  | 9.94                                      | 0.22 | 80.50                                                               | 1.00              | 1.00               | –     | –    | 41.87                                                                | 1.00              | 1.00               | –     | –    |
| 2nd                                                                              | 48.74 | 43.69 | 53.04  | 11.34                                     | 0.20 | 89.16                                                               | 1.11              | 1.10               | 1.05  | 1.15 | 56.35                                                                | 1.35              | 1.31               | 1.18  | 1.46 |
| 3rd                                                                              | 57.06 | 53.05 | 60.96  | 12.16                                     | 0.21 | 92.65                                                               | 1.15              | 1.14               | 1.09  | 1.18 | 60.76                                                                | 1.45              | 1.39               | 1.25  | 1.54 |
| 4th                                                                              | 65.37 | 60.96 | 70.14  | 13.38                                     | 0.21 | 94.08                                                               | 1.17              | 1.15               | 1.10  | 1.19 | 70.18                                                                | 1.68              | 1.55               | 1.41  | 1.72 |
| 5th                                                                              | 78.06 | 70.14 | 100.00 | 15.41 <sup>‡</sup>                        | 0.21 | 95.30                                                               | 1.18 <sup>‡</sup> | 1.15 <sup>‡</sup>  | 1.10  | 1.19 | 77.20                                                                | 1.84 <sup>‡</sup> | 1.64 <sup>‡</sup>  | 1.48  | 1.81 |

\*PR=Prevalence ratios estimated using Poisson regression.

<sup>i</sup>PRadj=Prevalence ratios adjusted for sex, age, race/ethnicity (White, Mixed ethnic group, Black or Black British, Asian or Asian British and Other race), region, survey year, and household income.

<sup>‡</sup>Significant linear trend across all quintiles ( $p \leq 0.01$ ).

Supplementary figure S1. Distribution of total energy intake by age groups, including outliers. UK population (2008-14).

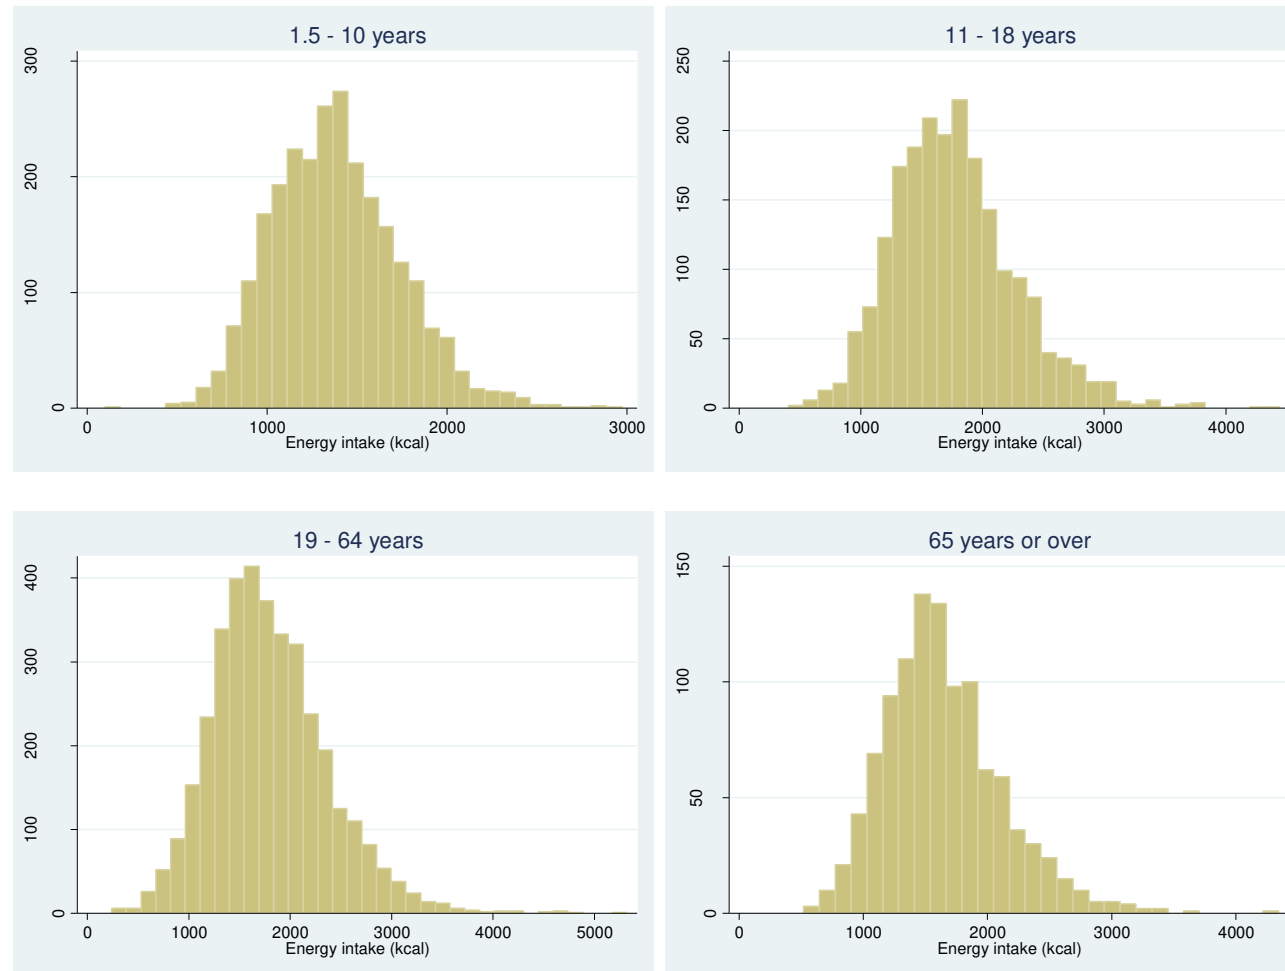



**Supplementary figure S2. Percentage of excessive free sugar intake that would be avoided under two possible scenarios regarding the consumption of the main dietary sources of free sugar. UK population aged 1.5 years or over (2008–14).**

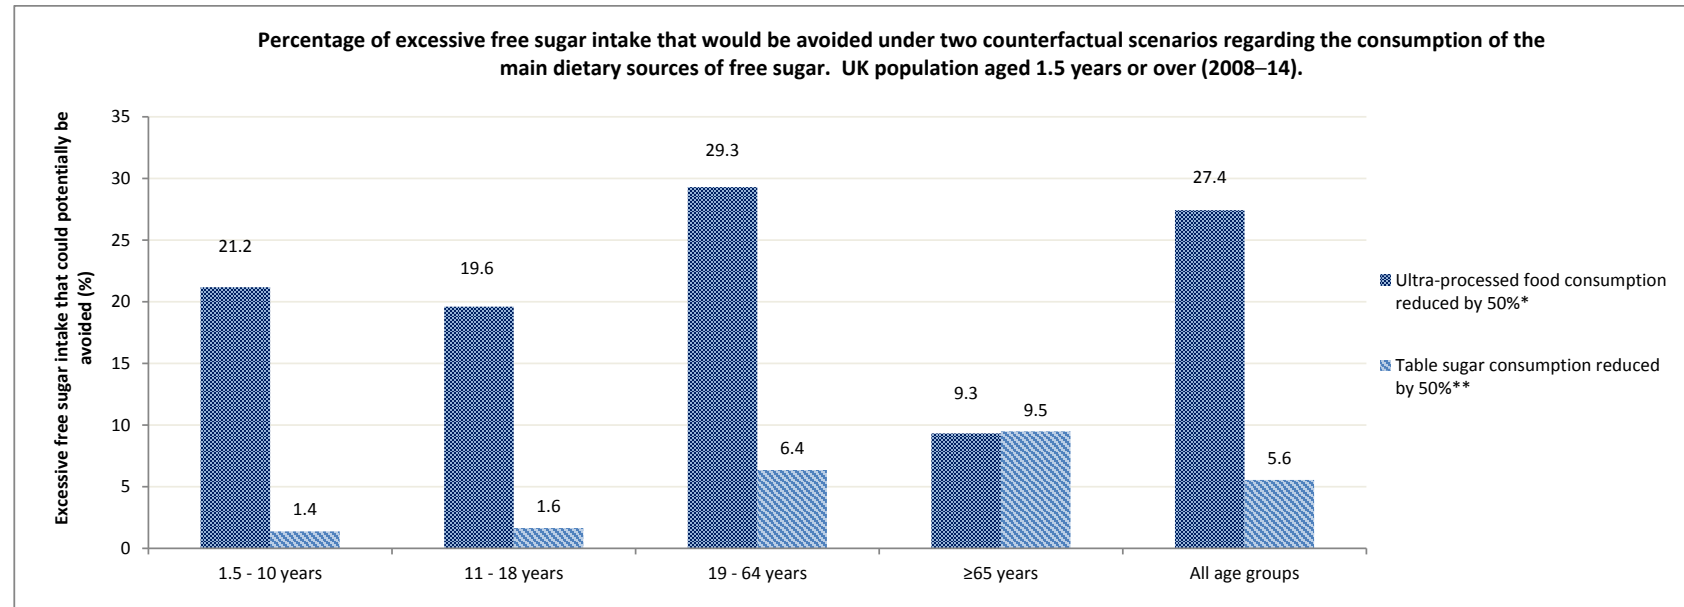

\* The consumption of ultra-processed food was reduced by 50% of the average intake for each age group (1.5-10y: from 63.5 to 28.4% of total energy intake; 11-18y: from 68 to 34%; 19-64y: from 54.8 to 27.4%; ≥65y: from 52.9 to 26.4%; all age groups: from 56.8 to 28.4%).

\*\* The consumption of table sugar (including honey, molasses, maple syrup) was reduced by 50% of the average intake for each age group (1.5-10y: from 0.48 to 0.24% of total energy intake; 11-18y: from 1.0 to 0.5%; 19-64y: from 1.8 to 0.9%; ≥65y: from 1.9 to 0.9%; all age groups: from 1.6 to 0.8%).
